# Supplementary material for: Stop codon read-through of mammalian MTCH2 leading to an unstable isoform regulates mitochondrial membrane potential
Source: PubMed Central journal article supplement (PMC7863902; doi:10.1074/jbc.ra120.014253), 2020-10-07

**Fig 2A left**

| Sample                                                                                  | Replicate | Fluc   | Rluc  | Fluc/Rluc   | Avg         | SD          |
|-----------------------------------------------------------------------------------------|-----------|--------|-------|-------------|-------------|-------------|
| <b><i>MTCH2 -Stop-Fluc</i></b>                                                          | 1         | 45200  | 22700 | 1.991189427 | 2.048054473 | 0.053309325 |
|                                                                                         | 2         | 54100  | 25800 | 2.096899225 |             |             |
|                                                                                         | 3         | 44000  | 21400 | 2.056074766 |             |             |
| <b><i>MTCH2 -Stop-ISR1+12<sup>ISR2</sup>-Fluc</i></b>                                   | 1         | 362000 | 37100 | 9.757412399 | 10.55370954 | 3.336405357 |
|                                                                                         | 2         | 295200 | 38400 | 7.6875      |             |             |
|                                                                                         | 3         | 526000 | 37000 | 14.21621622 |             |             |
| <b><i>MTCH2 -Stop-Non specific-Fluc</i></b>                                             | 1         | 12500  | 25700 | 0.486381323 | 0.368202038 | 0.102854804 |
|                                                                                         | 2         | 7600   | 23800 | 0.319327731 |             |             |
|                                                                                         | 3         | 8130   | 27200 | 0.298897059 |             |             |
| <b><i>MTCH2 -No Stop-Fluc</i></b>                                                       | 1         | 833000 | 38700 | 21.5245478  | 17.79516187 | 4.883544479 |
|                                                                                         | 2         | 723000 | 36900 | 19.59349593 |             |             |
|                                                                                         | 3         | 422000 | 34400 | 12.26744186 |             |             |
| <b>No Fluc</b>                                                                          | 1         | 9      | 40600 | 0.000221675 | 0.000311009 | 9.76294E-05 |
|                                                                                         | 2         | 13     | 43900 | 0.000296128 |             |             |
|                                                                                         | 3         | 12     | 28900 | 0.000415225 |             |             |
| <b>P value</b>                                                                          |           |        |       |             |             |             |
| <i>MTCH2 -Stop-Fluc</i> and <i>MTCH2 -Stop-ISR1+12<sup>ISR2</sup>-Fluc</i>              | 0.012     |        |       |             |             |             |
| <i>MTCH2 -Stop-ISR1+12<sup>ISR2</sup>-Fluc</i> and <i>MTCH2 -Stop-Non specific-Fluc</i> | 0.006     |        |       |             |             |             |

**Fig 2A left**

MTCH2-Stop-Fluc  
MTCH2-Stop-ISR1+12<sup>ISR2</sup>-FLuc  
MTCH2-Stop-Non specific-Fluc  
MTCH2-No Stop-FLuc  
No FLuc

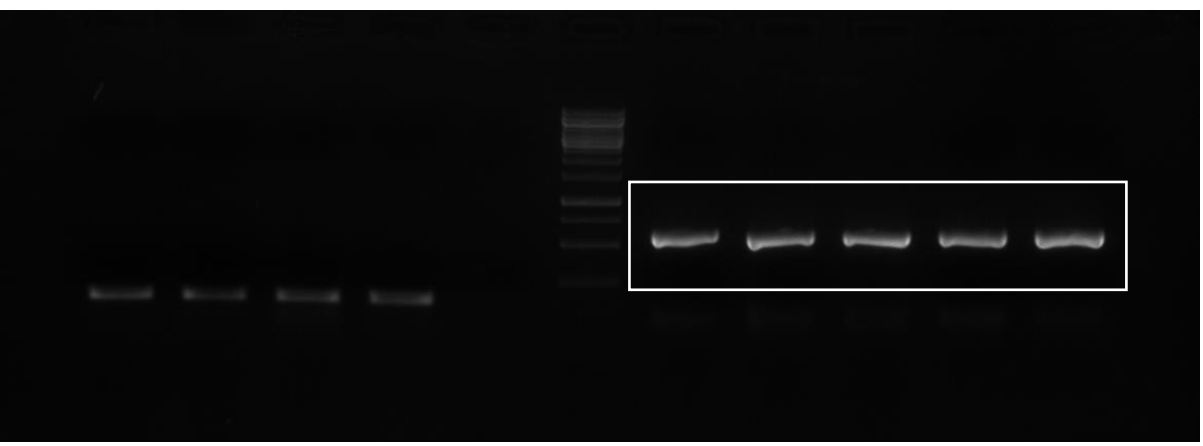

*FLuc*

*GAPDH*

**Exposure 1**

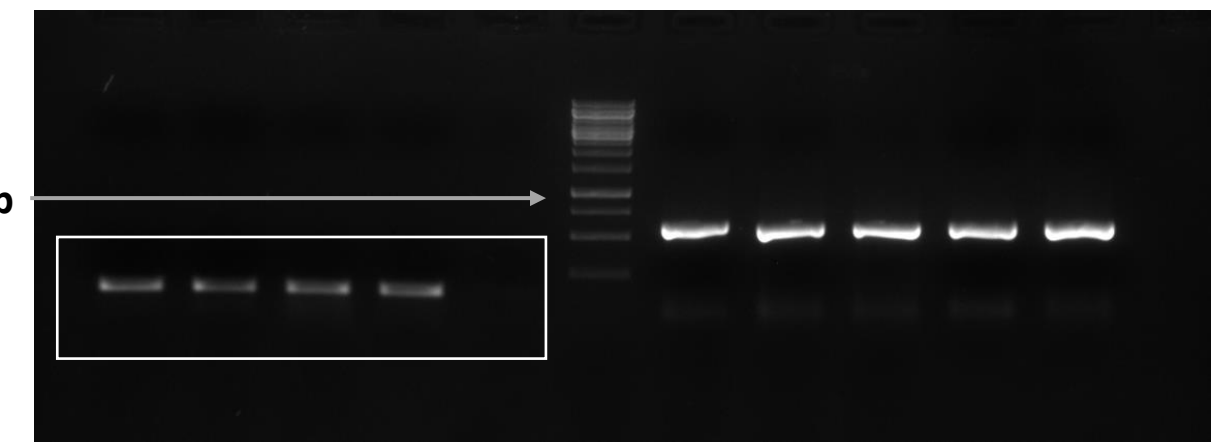

1 kb

*FLuc*

*GAPDH*

**Exposure 2**

**Fig 2A right**

| <b>Sample</b>                                                              | <b>Replicate</b> | <b>Fluc</b>                | <b>Avg</b>  | <b>SD</b>   |
|----------------------------------------------------------------------------|------------------|----------------------------|-------------|-------------|
| <b><i>MTCH2 -Stop-Fluc</i></b>                                             | 1                | 39                         | 54.66666667 | 18.44812547 |
|                                                                            | 2                | 75                         |             |             |
|                                                                            | 3                | 50                         |             |             |
| <b><i>MTCH2 -Stop-ISR1+12<sup>ISR2</sup>-FLuc</i></b>                      | 1                | 2619                       | 2951.333333 | 350.1918522 |
|                                                                            | 2                | 3317                       |             |             |
|                                                                            | 3                | 2918                       |             |             |
| <b><i>MTCH2 -No Stop-FLuc</i></b>                                          | 1                | 7547                       | 5486.666667 | 2215.629106 |
|                                                                            | 2                | 5770                       |             |             |
|                                                                            | 3                | 3143                       |             |             |
|                                                                            |                  |                            |             |             |
| <b>P value</b>                                                             |                  |                            |             |             |
| <i>MTCH2 -Stop-Fluc</i> and <i>MTCH2 -Stop-ISR1+12<sup>ISR2</sup>-FLuc</i> | 0.005            | Welch's correction applied |             |             |

**Fig 2B top**

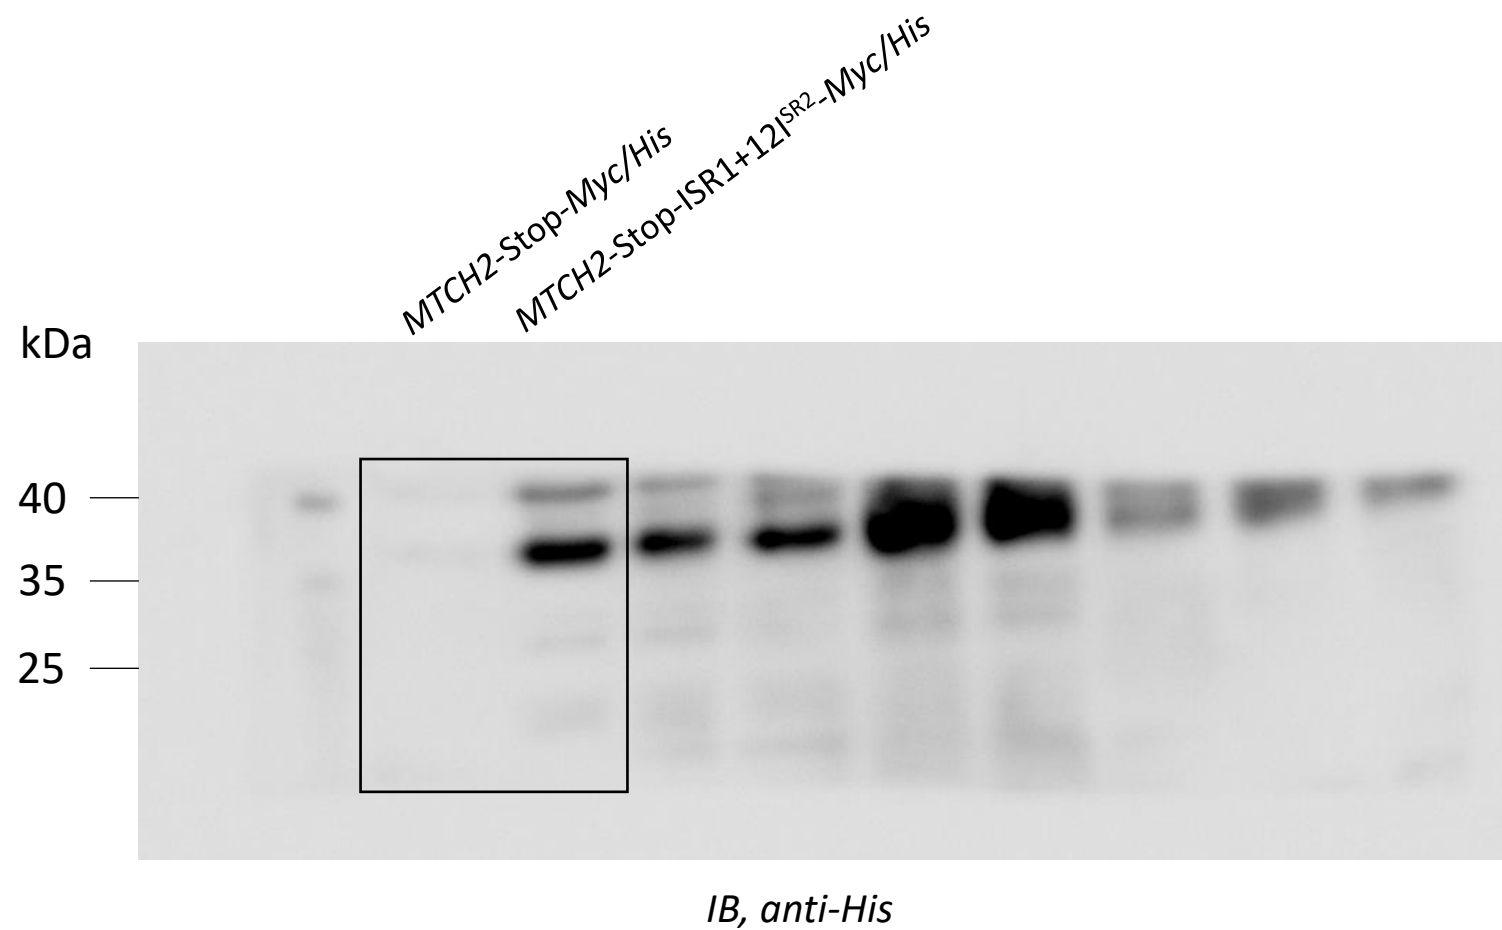

**Fig 2B bottom**

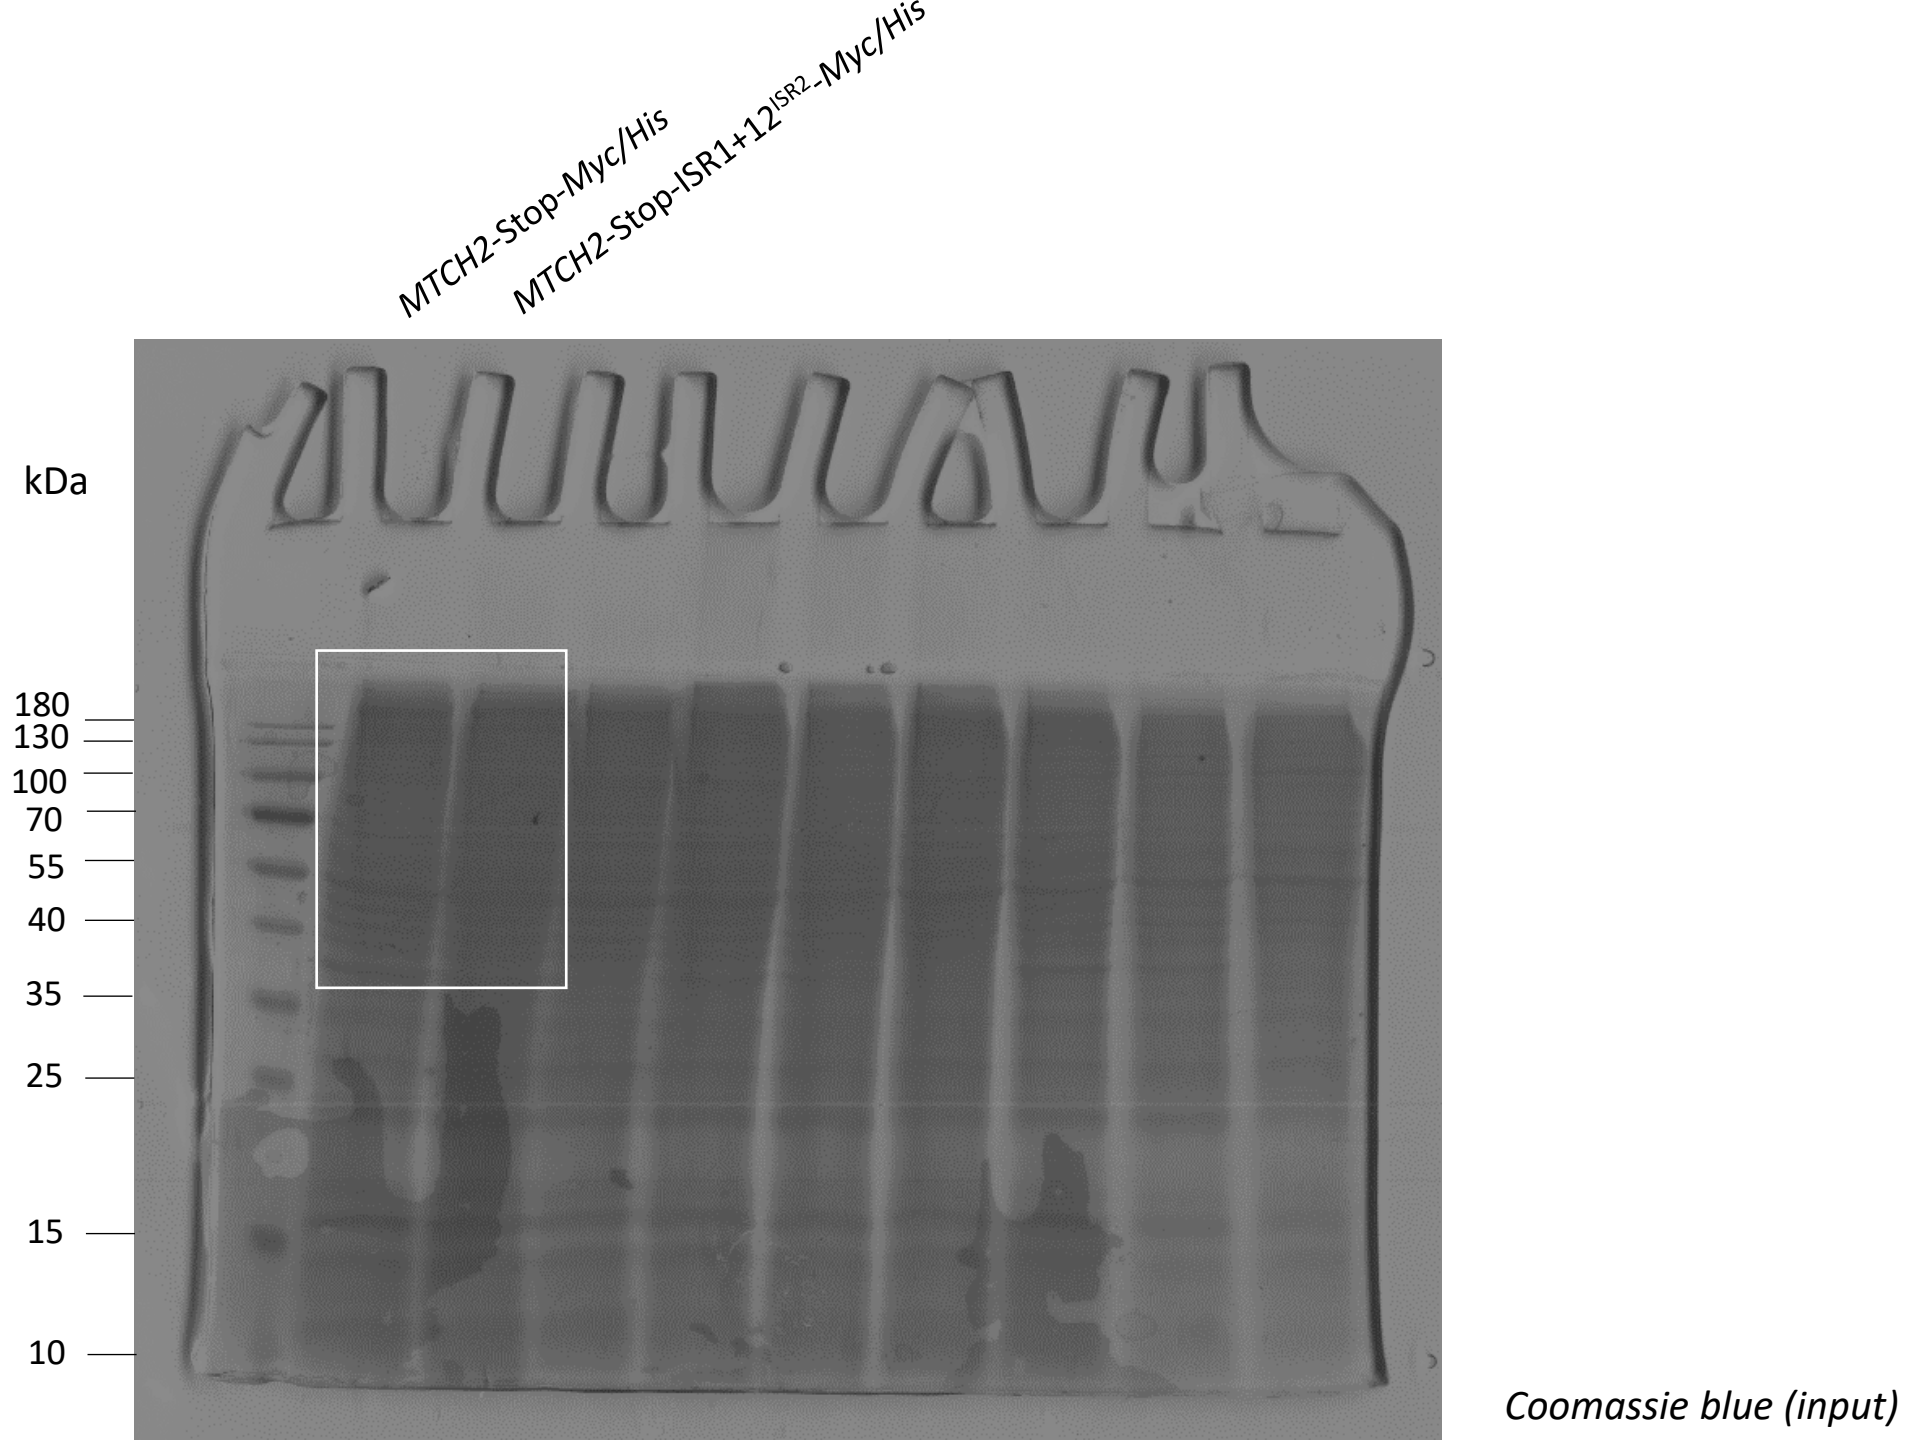

**Fig 2C**

| <b>Sample</b>                                                                   | <b>Replicate</b> | <b>GFP MFI</b> | <b>RFP MFI</b> | <b>GFP/RFP</b> | <b>Avg</b>  | <b>SD</b>   |
|---------------------------------------------------------------------------------|------------------|----------------|----------------|----------------|-------------|-------------|
| <b><i>MTCH2 -Stop-GFP</i></b>                                                   | 1                | 1138.1         | 1078.8         | 1.054968484    | 1.112259838 | 0.089377815 |
|                                                                                 | 2                | 1038.3         | 973.5          | 1.066563945    |             |             |
|                                                                                 | 3                | 1209.9         | 995.6          | 1.215247087    |             |             |
| <b><i>MTCH2 -Stop-ISR1+12<sup>ISR2</sup>-GFP</i></b>                            | 1                | 10982.4        | 1491.9         | 7.361351297    | 7.734263723 | 0.380294958 |
|                                                                                 | 2                | 10440.4        | 1352.4         | 7.719905353    |             |             |
|                                                                                 | 3                | 10458.1        | 1287.7         | 8.121534519    |             |             |
| <b><i>MTCH2 -No Stop-GFP</i></b>                                                | 1                | 10754.6        | 905.1          | 11.88222296    | 12.27967012 | 0.9876024   |
|                                                                                 | 2                | 11243.1        | 973.2          | 11.5527127     |             |             |
|                                                                                 | 3                | 11053          | 824.6          | 13.4040747     |             |             |
|                                                                                 |                  |                |                |                |             |             |
|                                                                                 |                  |                |                |                |             |             |
| <b>P value</b>                                                                  |                  |                |                |                |             |             |
| <b><i>MTCH2 -Stop-GFP</i> and <i>MTCH2 -Stop-ISR1+12<sup>ISR2</sup>-GFP</i></b> | <0.0001          |                |                |                |             |             |

Fig 2C

*MTCH2-Stop-GFP*

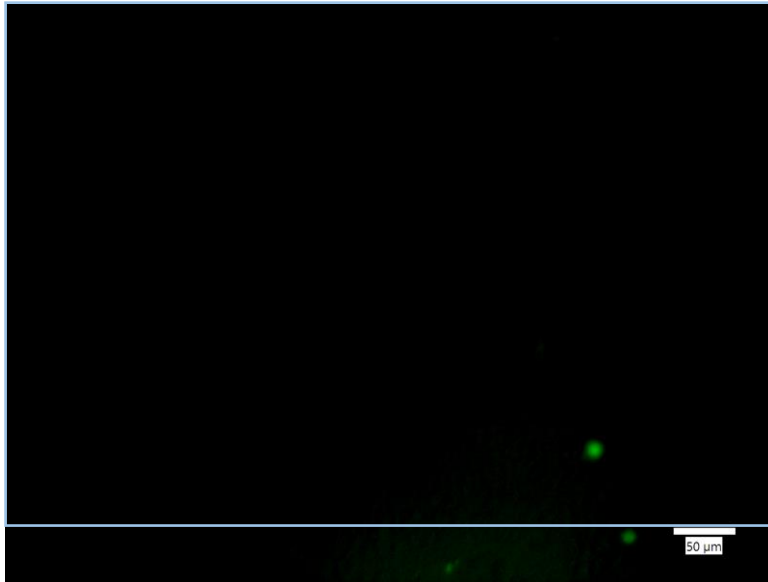

*MTCH2-Stop-ISR1+12<sup>ISR2</sup>-GFP*

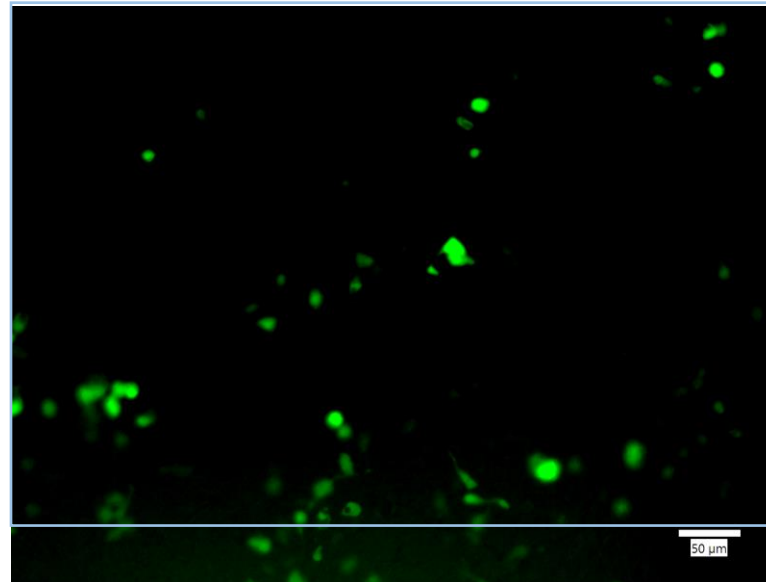

*MTCH2-No Stop-GFP*

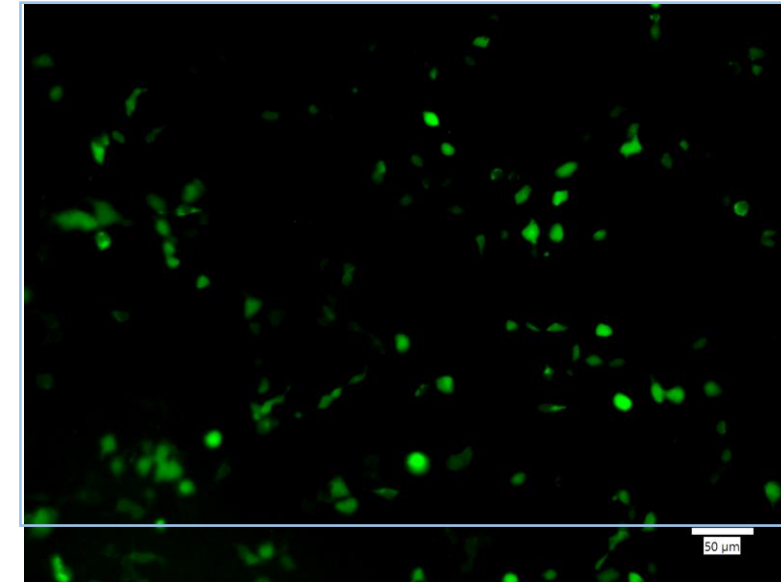

**Fig 2D**

| Sample                                                                                                    | Replicate | Fluc   | Rluc    | Fluc/Rluc   | Avg         | SD          |
|-----------------------------------------------------------------------------------------------------------|-----------|--------|---------|-------------|-------------|-------------|
| <i>Rluc</i> -Stop-non specific- <i>Fluc</i>                                                               | 1         | 1950   | 73700   | 0.026458616 | 0.025909391 | 0.001254471 |
|                                                                                                           | 2         | 2210   | 90300   | 0.024473976 |             |             |
|                                                                                                           | 3         | 1940   | 72400   | 0.02679558  |             |             |
| <i>Rluc</i> -Stop-ISR1+12 <sup>ISR2</sup> - <i>FLuc</i>                                                   | 1         | 1110   | 11400   | 0.097368421 | 0.093928456 | 0.009237474 |
|                                                                                                           | 2         | 1060   | 12700   | 0.083464567 |             |             |
|                                                                                                           | 3         | 1060   | 10500   | 0.100952381 |             |             |
| <i>Rluc</i> - No stop-ISR1+12 <sup>ISR2</sup> - <i>FLuc</i>                                               | 1         | 341000 | 1080000 | 0.315740741 | 0.347855423 | 0.034618538 |
|                                                                                                           | 2         | 333000 | 970000  | 0.343298969 |             |             |
|                                                                                                           | 3         | 333000 | 866000  | 0.384526559 |             |             |
| <b>P value</b>                                                                                            |           |        |         |             |             |             |
| <i>Rluc</i> - Stop-non specific- <i>Fluc</i> and <i>Rluc</i> - Stop-ISR1+12 <sup>ISR2</sup> - <i>FLuc</i> |           | <0.001 |         |             |             |             |



**Fig 3A left**

| <b>Sample</b>                                                                       | <b>Replicate</b> | <b>Fluc</b> | <b>Rluc</b>      | <b>Fluc/Rluc</b> | <b>Avg</b>  | <b>SD</b>   |
|-------------------------------------------------------------------------------------|------------------|-------------|------------------|------------------|-------------|-------------|
| <b><i>MTCH2 -Stop-ISR1-Stop-Fluc</i></b>                                            | 1                | 1830        | 91900            | 0.019912949      | 0.021895527 | 0.002563526 |
|                                                                                     | 2                | 2070        | 83500            | 0.024790419      |             |             |
|                                                                                     | 3                | 1750        | 83400            | 0.020983213      |             |             |
| <b><i>MTCH2 -Stop-ISR1-Stop-ISR2-FLuc</i></b>                                       | 1                | 7340        | 77400            | 0.094832041      | 0.107120687 | 0.013733271 |
|                                                                                     | 2                | 9780        | 80200            | 0.121945137      |             |             |
|                                                                                     | 3                | 8440        | 80700            | 0.104584882      |             |             |
| <b><i>MTCH2 -No Stop-Fluc</i></b>                                                   | 1                | 14000       | 16800            | 0.833333333      | 0.995852703 | 0.14082265  |
|                                                                                     | 2                | 17200       | 15900            | 1.081761006      |             |             |
|                                                                                     | 3                | 14800       | 13800            | 1.072463768      |             |             |
| <b><i>No Fluc</i></b>                                                               | 1                | 58          | 28200            | 0.002056738      | 0.001128328 | 0.000822155 |
|                                                                                     | 2                | 28          | 33500            | 0.000835821      |             |             |
|                                                                                     | 3                | 13          | 26400            | 0.000492424      |             |             |
|                                                                                     |                  |             |                  |                  |             |             |
| P value                                                                             |                  |             |                  |                  |             |             |
| <b><i>MTCH2 -Stop-ISR1-Stop-Fluc</i> and <i>MTCH2 -Stop-ISR1-Stop-ISR2-Fluc</i></b> |                  |             | <b>&lt;0.001</b> |                  |             |             |

**Fig 3A left**

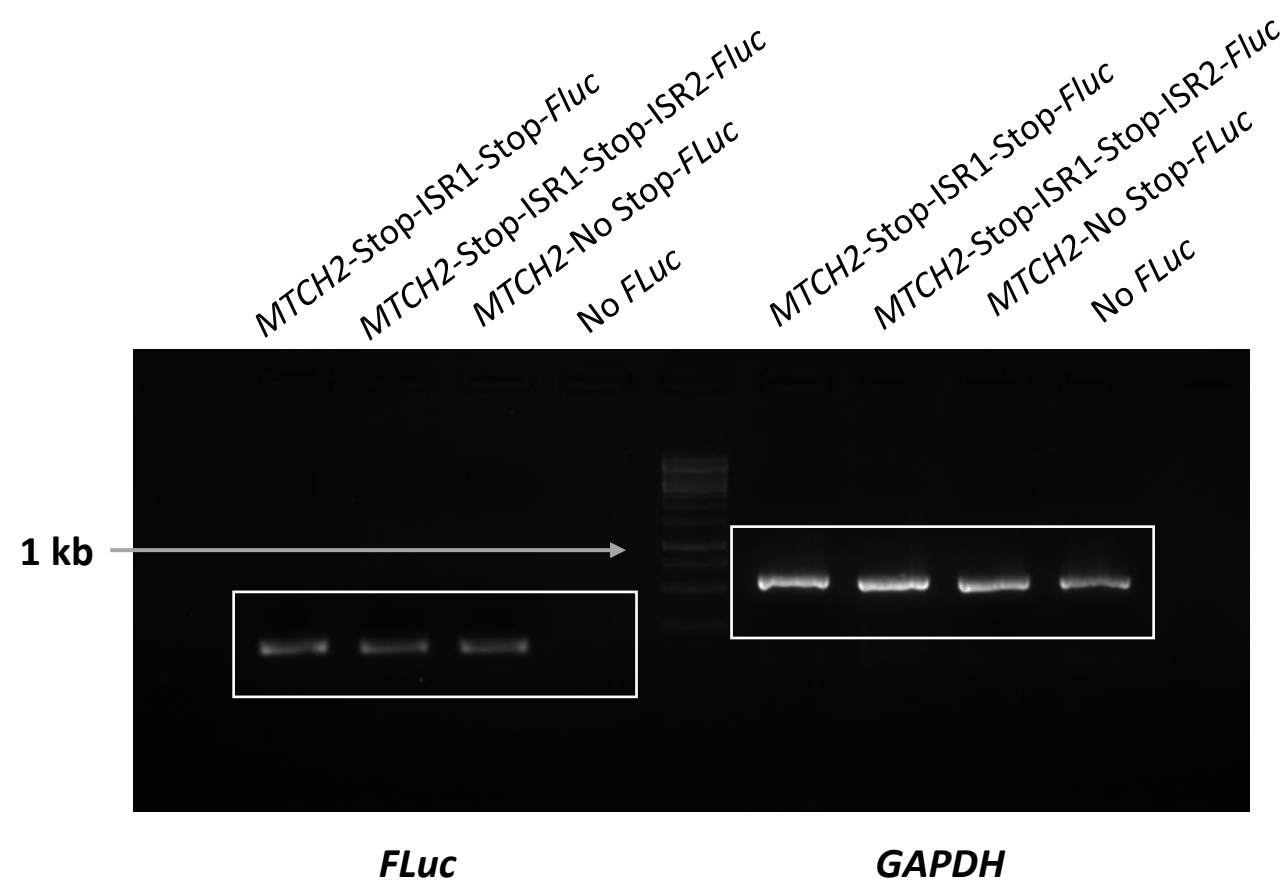

**Fig 3A right**

| <b>Sample</b>                                                                       | <b>Replicate</b> | <b>Fluc</b> | <b>Avg</b>                 | <b>SD</b>   |
|-------------------------------------------------------------------------------------|------------------|-------------|----------------------------|-------------|
| <b><i>MTCH2 -Stop-ISR1-Stop-Fluc</i></b>                                            | 1                | 109         | 173.6666667                | 88.86694174 |
|                                                                                     | 2                | 137         |                            |             |
|                                                                                     | 3                | 275         |                            |             |
| <b><i>MTCH2 -Stop-ISR1-Stop-ISR2-FLuc</i></b>                                       | 1                | 13900       | 11416.66667                | 2475.042087 |
|                                                                                     | 2                | 11400       |                            |             |
|                                                                                     | 3                | 8950        |                            |             |
| <b><i>MTCH2 -No Stop-Fluc</i></b>                                                   | 1                | 73800       | 99266.66667                | 22077.43947 |
|                                                                                     | 2                | 111000      |                            |             |
|                                                                                     | 3                | 113000      |                            |             |
|                                                                                     |                  |             |                            |             |
|                                                                                     |                  |             |                            |             |
| P value                                                                             |                  |             |                            |             |
| <b><i>MTCH2 -Stop-ISR1-Stop-Fluc</i> and <i>MTCH2 -Stop-ISR1-Stop-ISR2-FLuc</i></b> |                  | 0.0158      | Welch's correction applied |             |

**Fig 3B**

| Sample                                                                            | Replicate | GFP MFI     | RFP MFI | GFP/RFP     | Avg         | SD          |
|-----------------------------------------------------------------------------------|-----------|-------------|---------|-------------|-------------|-------------|
| <b><i>MTCH2 -Stop-ISR1-Stop-GFP</i></b>                                           | 1         | 170.133333  | 477.7   | 0.356151001 | 0.360166881 | 0.007013245 |
|                                                                                   | 2         | 169.733333  | 460.9   | 0.368264988 |             |             |
|                                                                                   | 3         | 157.033333  | 441     | 0.356084655 |             |             |
| <b><i>MTCH2 -Stop-ISR1-Stop-ISR2-GFP</i></b>                                      | 1         | 939.633333  | 486.6   | 1.931017947 | 1.719830229 | 0.193698769 |
|                                                                                   | 2         | 843.133333  | 543.8   | 1.550447468 |             |             |
|                                                                                   | 3         | 1137.533333 | 677.9   | 1.678025274 |             |             |
| <b><i>MTCH2 -No Stop-GFP</i></b>                                                  | 1         | 14985.63333 | 1004.2  | 14.92295691 | 14.93940516 | 1.056443265 |
|                                                                                   | 2         | 14446.93333 | 1040    | 13.89128205 |             |             |
|                                                                                   | 3         | 14622.83333 | 913.7   | 16.00397651 |             |             |
|                                                                                   |           |             |         |             |             |             |
|                                                                                   |           |             |         |             |             |             |
| P value                                                                           |           |             |         |             |             |             |
| <b><i>MTCH2 -Stop-ISR1-Stop-GFP</i> and <i>MTCH2 -Stop-ISR1-Stop-ISR2-GFP</i></b> |           |             | 0.0003  |             |             |             |

**Fig 3B**

*MTCH2-Stop-ISR1-Stop-GFP*

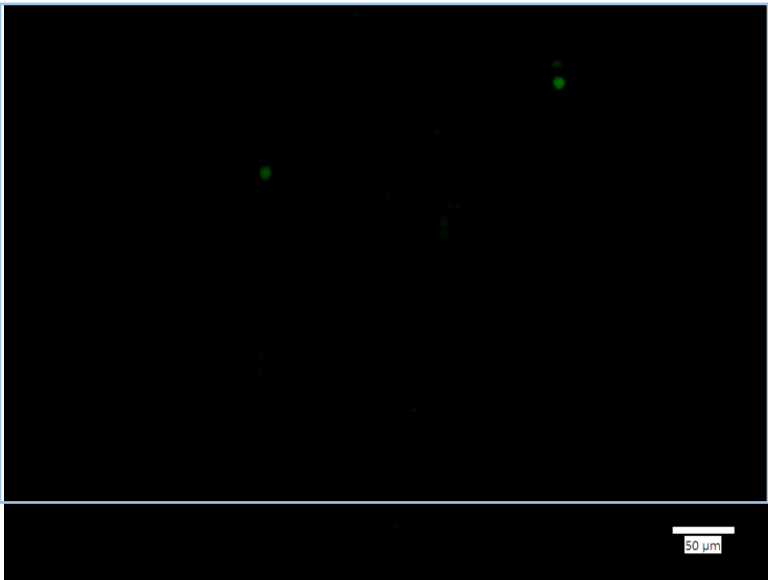

*MTCH2-Stop-ISR1-Stop-ISR2-GFP*

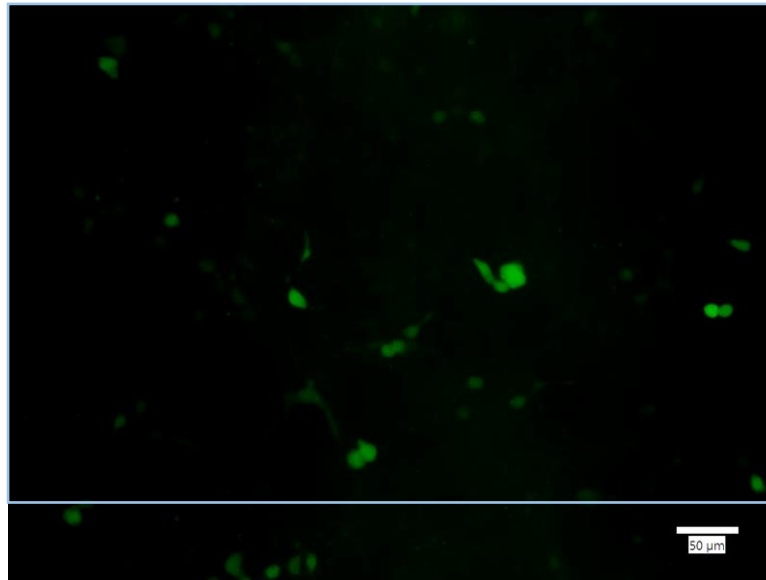

*MTCH2-No Stop-GFP*

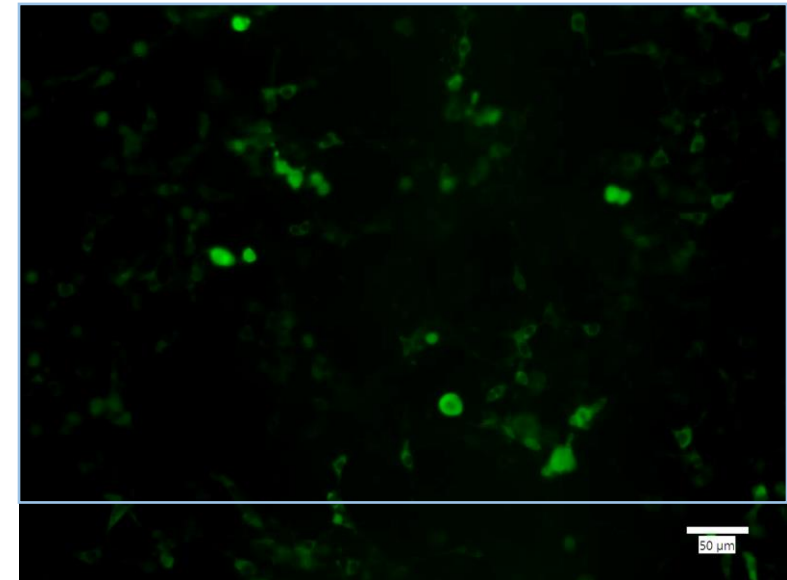

**Fig 3C**

| Sample                                                                                | Replicate | Fluc   | Rluc                       | Fluc/Rluc   | Avg         | SD          |
|---------------------------------------------------------------------------------------|-----------|--------|----------------------------|-------------|-------------|-------------|
| <i>Rluc -Stop-ISR1-Stop-Fluc</i>                                                      | 1         | 384    | 56800                      | 0.006760563 | 0.004582753 | 0.002673198 |
|                                                                                       | 2         | 340    | 63100                      | 0.005388273 |             |             |
|                                                                                       | 3         | 111    | 69400                      | 0.001599424 |             |             |
| <i>Rluc -Stop-non specific-Fluc</i>                                                   | 1         | 2060   | 424000                     | 0.004858491 | 0.004348468 | 0.000511443 |
|                                                                                       | 2         | 2180   | 501000                     | 0.004351297 |             |             |
|                                                                                       | 3         | 1960   | 511000                     | 0.003835616 |             |             |
| <i>Rluc -Stop-ISR1-Stop-ISR2-FLuc</i>                                                 | 1         | 932    | 62900                      | 0.01481717  | 0.014737722 | 0.001189018 |
|                                                                                       | 2         | 862    | 63800                      | 0.013510972 |             |             |
|                                                                                       | 3         | 1050   | 66100                      | 0.015885023 |             |             |
| <i>Rluc -Stop-ISR1+12<sup>ISR2</sup>-FLuc</i>                                         | 1         | 3020   | 49500                      | 0.061010101 | 0.055948159 | 0.00714586  |
|                                                                                       | 2         | 2790   | 58400                      | 0.047773973 |             |             |
|                                                                                       | 3         | 2640   | 44700                      | 0.059060403 |             |             |
| <i>Rluc -No stop-ISR1+12<sup>ISR2</sup>-FLuc</i>                                      | 1         | 539000 | 2090000                    | 0.257894737 | 0.288646905 | 0.029481087 |
|                                                                                       | 2         | 570000 | 1800000                    | 0.316666667 |             |             |
|                                                                                       | 3         | 676000 | 2320000                    | 0.29137931  |             |             |
| P value                                                                               |           |        |                            |             |             |             |
| <i>Rluc -Stop-ISR1-Stop-Fluc</i> and <i>Rluc -Stop-ISR1-Stop-ISR2-Fluc</i>            |           | 0.0039 |                            |             |             |             |
| <i>Rluc- Stop-non specific-Fluc</i> and <i>Rluc -Stop-ISR1-Stop-ISR2-Fluc</i>         |           | 0.001  | Welch's correction applied |             |             |             |
| <i>Rluc- Stop-non specific-Fluc</i> and <i>Rluc- Stop-ISR1+12<sup>ISR2</sup>-FLuc</i> |           | 0.0002 |                            |             |             |             |

**Fig 4A**

| Sample                                                                                                                | Replicate | Fluc  | Rluc    | Fluc/Rluc   | Avg         | SD          |
|-----------------------------------------------------------------------------------------------------------------------|-----------|-------|---------|-------------|-------------|-------------|
| <b><i>MTCH2 -Stop-Fluc</i></b>                                                                                        | 1         | 1310  | 1270000 | 0.001031496 | 0.000696405 | 0.000335625 |
|                                                                                                                       | 2         | 634   | 909000  | 0.00069747  |             |             |
|                                                                                                                       | 3         | 348   | 966000  | 0.000360248 |             |             |
| <b><i>MTCH2 -Stop-ISR1+12<sup>ISR2</sup> (WT)-FLuc</i></b>                                                            | 1         | 8340  | 841000  | 0.009916766 | 0.013560588 | 0.003251991 |
|                                                                                                                       | 2         | 17300 | 1070000 | 0.016168224 |             |             |
|                                                                                                                       | 3         | 18100 | 1240000 | 0.014596774 |             |             |
| <b><i>MTCH2 -Stop-ISR1+12<sup>ISR2</sup> (AU-CG)-FLuc</i></b>                                                         | 1         | 2260  | 1310000 | 0.001725191 | 0.000762901 | 0.000858527 |
|                                                                                                                       | 2         | 532   | 1090000 | 0.000488073 |             |             |
|                                                                                                                       | 3         | 86    | 1140000 | 7.54386E-05 |             |             |
| <b><i>MTCH2 -Stop-ISR1+12<sup>ISR2</sup> (CC-GG)-FLuc</i></b>                                                         | 1         | 4380  | 1070000 | 0.004093458 | 0.004627088 | 0.000535764 |
|                                                                                                                       | 2         | 4540  | 879000  | 0.00516496  |             |             |
|                                                                                                                       | 3         | 4290  | 928000  | 0.004622845 |             |             |
| <b><i>MTCH2 -No Stop-FLuc</i></b>                                                                                     | 1         | 29400 | 824000  | 0.035679612 | 0.035383596 | 0.000657741 |
|                                                                                                                       | 2         | 26200 | 731000  | 0.035841313 |             |             |
|                                                                                                                       | 3         | 27600 | 797000  | 0.034629862 |             |             |
| <b>No FLuc</b>                                                                                                        | 1         | 61    | 192000  | 0.000317708 | 0.000267103 | 7.55325E-05 |
|                                                                                                                       | 2         | 64    | 211000  | 0.000303318 |             |             |
|                                                                                                                       | 3         | 64    | 355000  | 0.000180282 |             |             |
| P value                                                                                                               |           |       |         |             |             |             |
| <b><i>MTCH2 -Stop-ISR1+12<sup>ISR2</sup> (WT)-FLuc</i> and <i>MTCH2 -Stop-ISR1+12<sup>ISR2</sup> (AU-CG)-FLuc</i></b> |           |       | 0.003   |             |             |             |
| <b><i>MTCH2 -Stop-ISR1+12<sup>ISR2</sup> (WT)-FLuc</i> and <i>MTCH2 -Stop-ISR1+12<sup>ISR2</sup> (CC-GG)-FLuc</i></b> |           |       | 0.009   |             |             |             |

**Fig 4A**

MTCH2-Stop-ISR1+12<sup>ISR2</sup> (WT)-FLuc  
MTCH2-Stop-ISR1+12<sup>ISR2</sup> (AU-CG)-FLuc  
MTCH2-Stop-ISR1+12<sup>ISR2</sup> (CC-GG)-FLuc  
MTCH2-Stop-ISR1+12<sup>ISR2</sup> (WT)-FLuc  
MTCH2-Stop-ISR1+12<sup>ISR2</sup> (AU-CG)-FLuc  
MTCH2-Stop-ISR1+12<sup>ISR2</sup> (CC-GG)-FLuc

MTCH2-Stop-ISR1+12<sup>ISR2</sup> (WT)-FLuc  
MTCH2-Stop-ISR1+12<sup>ISR2</sup> (AU-CG)-FLuc  
MTCH2-Stop-ISR1+12<sup>ISR2</sup> (CC-GG)-FLuc  
MTCH2-Stop-ISR1+12<sup>ISR2</sup> (WT)-FLuc  
MTCH2-Stop-ISR1+12<sup>ISR2</sup> (AU-CG)-FLuc  
MTCH2-Stop-ISR1+12<sup>ISR2</sup> (CC-GG)-FLuc

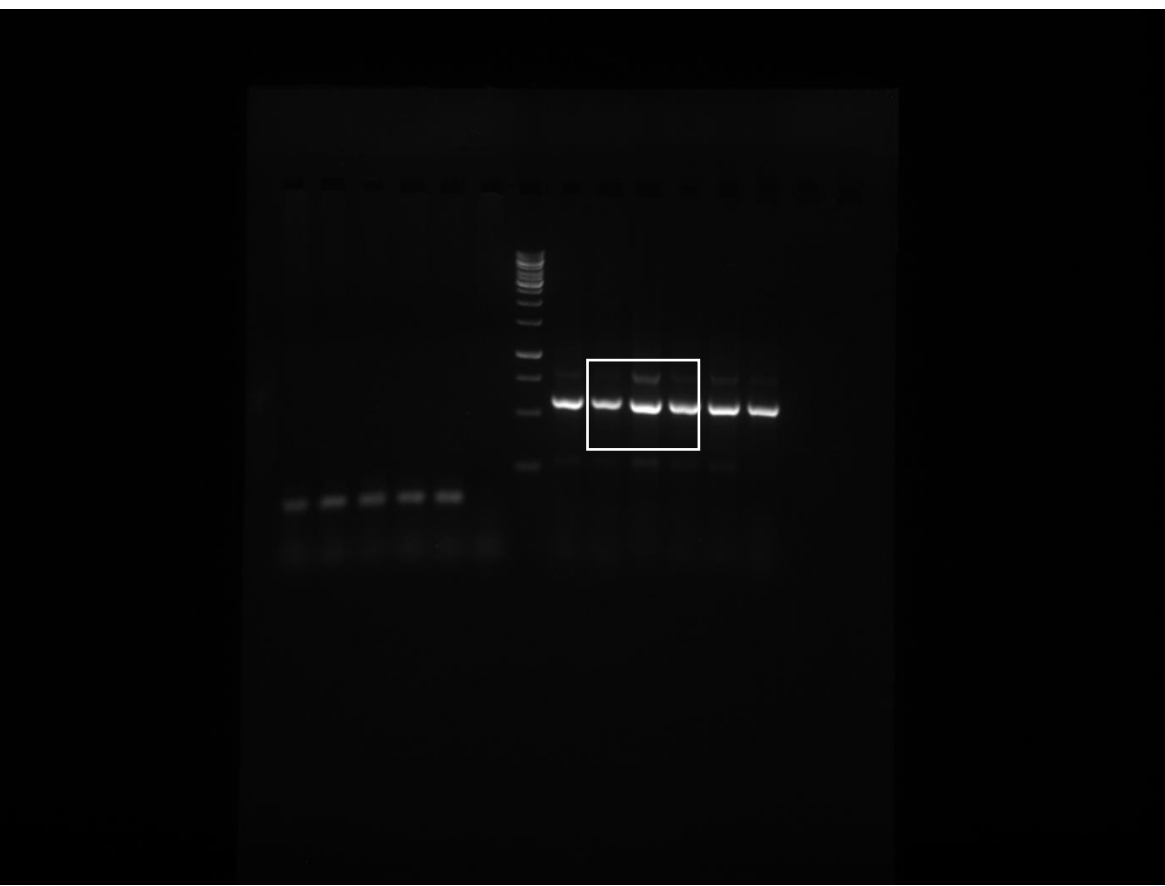

*FLuc*

*GAPDH*

Exposure 1

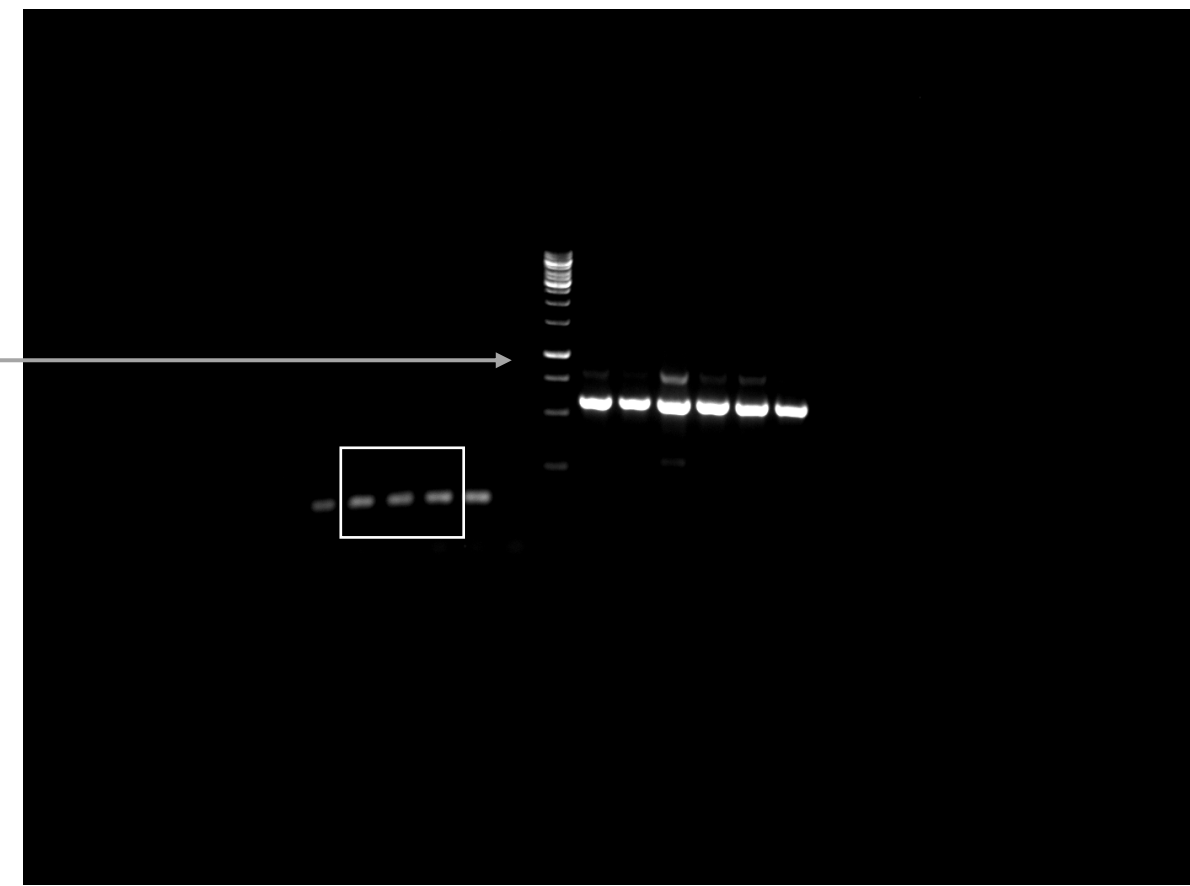

*FLuc*

*GAPDH*

Exposure 2



**Fig 4B**

| Sample                                                                               | Replicate | Fluc   | Rluc   | Fluc/Rluc   | Avg         | SD          |
|--------------------------------------------------------------------------------------|-----------|--------|--------|-------------|-------------|-------------|
| <b><i>MTCH2 -Stop-Fluc</i></b>                                                       | 1         | 476    | 285000 | 0.001670175 | 0.001987312 | 0.000281436 |
|                                                                                      | 2         | 469    | 225000 | 0.002084444 |             |             |
|                                                                                      | 3         | 362    | 164000 | 0.002207317 |             |             |
| <b><i>MTCH2 -Stop-ISR1+12<sup>ISR2</sup>-FLuc</i></b>                                | 1         | 17700  | 275000 | 0.064363636 | 0.06085084  | 0.004467126 |
|                                                                                      | 2         | 17400  | 279000 | 0.062365591 |             |             |
|                                                                                      | 3         | 13900  | 249000 | 0.055823293 |             |             |
| <b><i>MTCH2 -Stop+12<sup>ISR2</sup>-FLuc</i></b>                                     | 1         | 22200  | 326000 | 0.06809816  | 0.069119123 | 0.001209257 |
|                                                                                      | 2         | 24800  | 352000 | 0.070454545 |             |             |
|                                                                                      | 3         | 23600  | 343000 | 0.068804665 |             |             |
| <b><i>MTCH2 -Stop-Non specific-Fluc</i></b>                                          | 1         | 198    | 260000 | 0.000761538 | 0.000806828 | 6.04996E-05 |
|                                                                                      | 2         | 204    | 233000 | 0.000875536 |             |             |
|                                                                                      | 3         | 170    | 217000 | 0.00078341  |             |             |
| <b><i>MTCH2 -No Stop-FLuc</i></b>                                                    | 1         | 18000  | 171000 | 0.105263158 | 0.118811329 | 0.016649646 |
|                                                                                      | 2         | 16900  | 123000 | 0.137398374 |             |             |
|                                                                                      | 3         | 19000  | 167000 | 0.113772455 |             |             |
| P value                                                                              |           |        |        |             |             |             |
| <b><i>MTCH2 -Stop-Fluc</i> and <i>MTCH2 -Stop-ISR1+12<sup>ISR2</sup>-FLuc</i></b>    |           | <0.001 |        |             |             |             |
| <b><i>MTCH2 -Stop-Fluc</i> and <i>MTCH2 -Stop+12<sup>ISR2</sup>-FLuc</i></b>         |           | <0.001 |        |             |             |             |
| <b><i>MTCH2 -Stop+12<sup>ISR2</sup>-Fluc</i> and <i>MTCH2 -Non specific-Fluc</i></b> |           | <0.001 |        |             |             |             |

**Fig 4B**

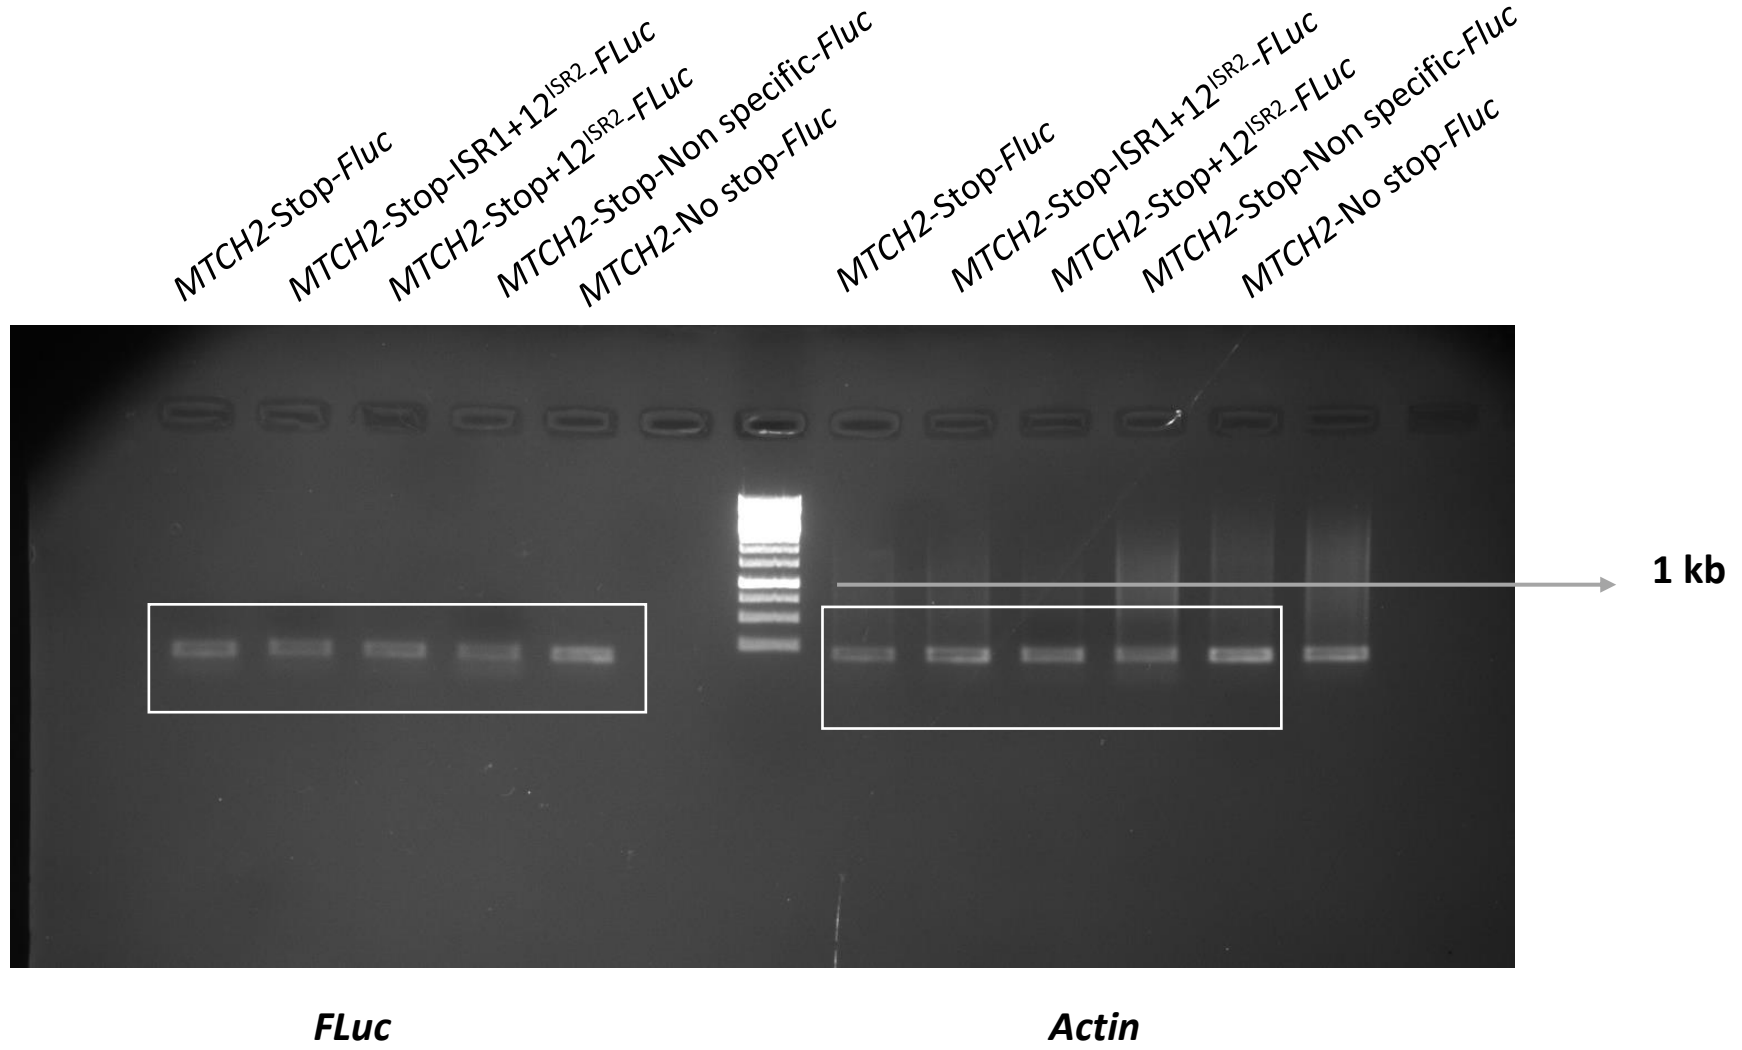

**Fig 4C**

| <b>Sample</b>                                              | <b>Replicate</b> | <b>Fluc</b> | <b>Rluc</b> | <b>Fluc/Rluc</b> | <b>Avg</b>  | <b>SD</b>   |
|------------------------------------------------------------|------------------|-------------|-------------|------------------|-------------|-------------|
| <b><i>MTCH2 -Stop-ISR1-Stop-Fluc</i></b>                   | 1                | 2620        | 6810        | 0.384728341      | 0.389873363 | 0.038611302 |
|                                                            | 2                | 1990        | 5620        | 0.354092527      |             |             |
|                                                            | 3                | 2210        | 5130        | 0.43079922       |             |             |
| <b><i>MTCH2 -Stop-ISR1-Stop-12<sup>ISR2</sup>-FLuc</i></b> | 1                | 35200       | 3330        | 10.57057057      | 8.780863016 | 2.313570607 |
|                                                            | 2                | 42500       | 6890        | 6.168359942      |             |             |
|                                                            | 3                | 31500       | 3280        | 9.603658537      |             |             |
|                                                            |                  |             |             |                  |             |             |
| P value                                                    | 0.003            |             |             |                  |             |             |

**Fig 4C**

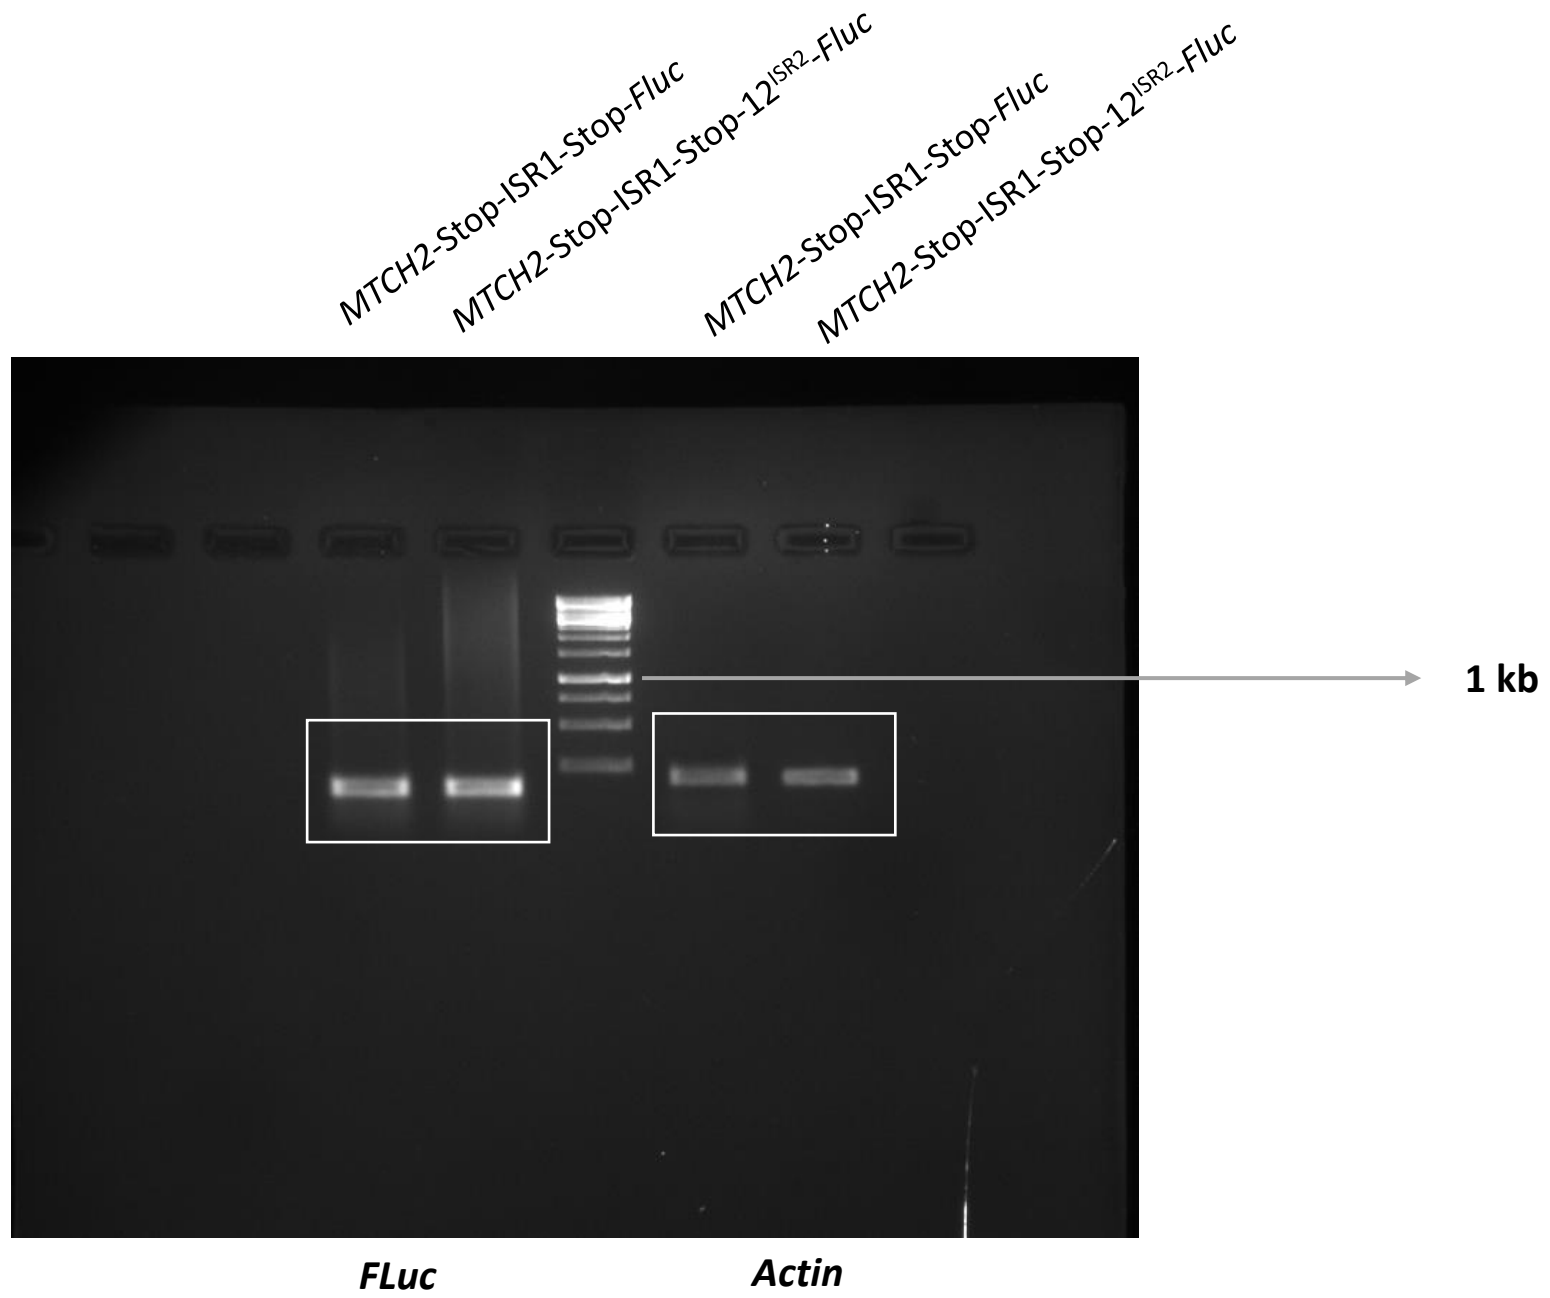

**Fig 4D**

| Sample                                                                                           | Replicate | Fluc   | Rluc    | Fluc/Rluc   | Avg         | SD          |
|--------------------------------------------------------------------------------------------------|-----------|--------|---------|-------------|-------------|-------------|
| <i>Rluc -Stop-Non specific-Fluc</i>                                                              | 1         | 254    | 187000  | 0.001358289 | 0.00181046  | 0.00043405  |
|                                                                                                  | 2         | 270    | 146000  | 0.001849315 |             |             |
|                                                                                                  | 3         | 318    | 143000  | 0.002223776 |             |             |
| <i>RLuc -Stop+12<sup>ISR2</sup>-FLuc</i>                                                         | 1         | 1080   | 173000  | 0.006242775 | 0.007183852 | 0.001220733 |
|                                                                                                  | 2         | 1490   | 174000  | 0.008563218 |             |             |
|                                                                                                  | 3         | 1140   | 169000  | 0.006745562 |             |             |
| <i>RLuc -Stop-ISR1+12<sup>ISR2</sup>-FLuc</i>                                                    | 1         | 1050   | 120000  | 0.00875     | 0.009382699 | 0.000559318 |
|                                                                                                  | 2         | 1040   | 106000  | 0.009811321 |             |             |
|                                                                                                  | 3         | 1160   | 121000  | 0.009586777 |             |             |
| <i>RLuc -MTCH2 -Stop-ISR1+12<sup>ISR2</sup>-FLuc</i>                                             | 1         | 808    | 13600   | 0.059411765 | 0.068147176 | 0.018760572 |
|                                                                                                  | 2         | 797    | 14400   | 0.055347222 |             |             |
|                                                                                                  | 3         | 1130   | 12600   | 0.08968254  |             |             |
| <i>RLuc -NoStop-FLuc</i>                                                                         | 1         | 374000 | 985000  | 0.379695431 | 0.321334454 | 0.078277173 |
|                                                                                                  | 2         | 347000 | 986000  | 0.351926978 |             |             |
|                                                                                                  | 3         | 244000 | 1050000 | 0.232380952 |             |             |
| P value                                                                                          |           |        |         |             |             |             |
| <i>Rluc -Stop-Non specific-Fluc</i> and <i>RLuc -Stop+12<sup>ISR2</sup>-FLuc</i>                 |           |        | 0.002   |             |             |             |
| <i>RLuc -Stop+12<sup>ISR2</sup>-FLuc</i> and <i>RLuc-MTCH2 -Stop-ISR1+12<sup>ISR2</sup>-FLuc</i> |           |        | 0.005   |             |             |             |

**Fig 5A**

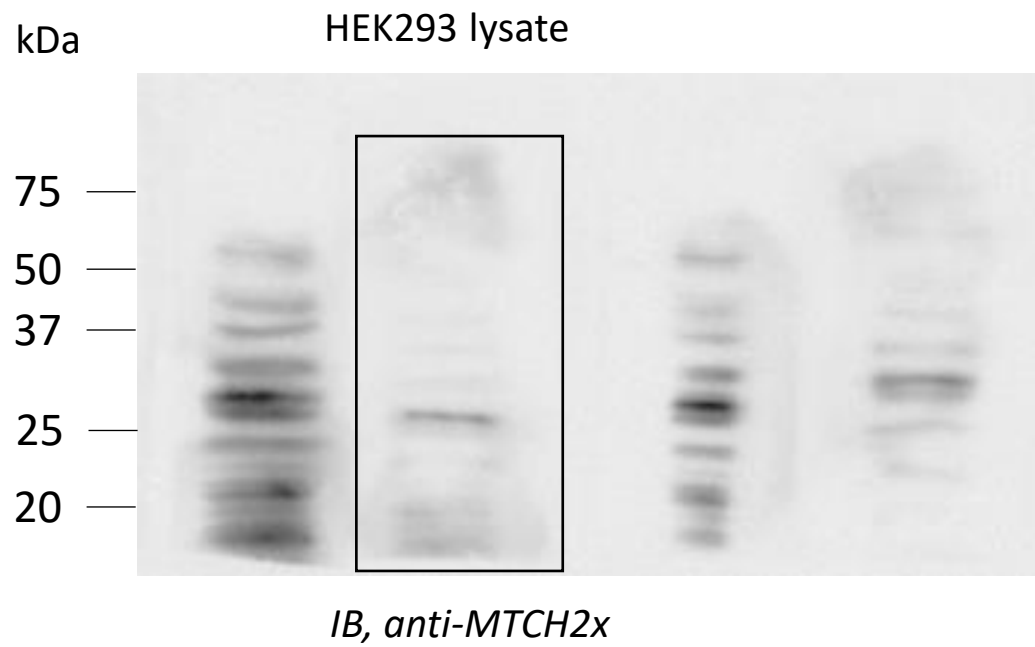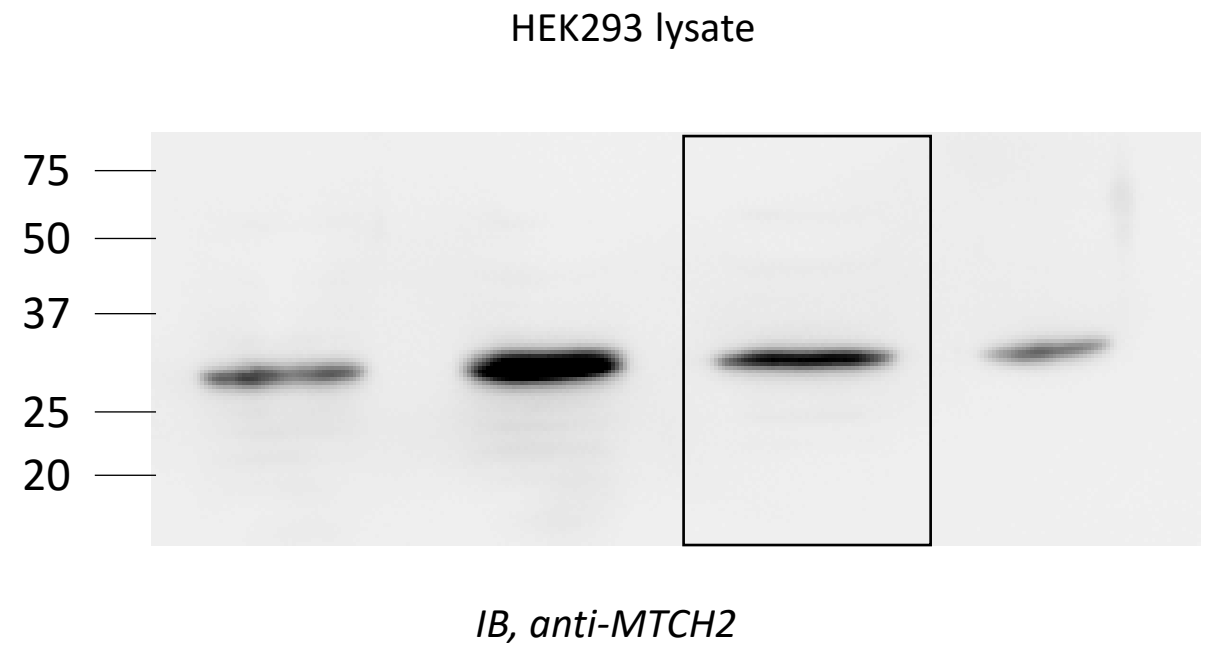

**Fig 5B**

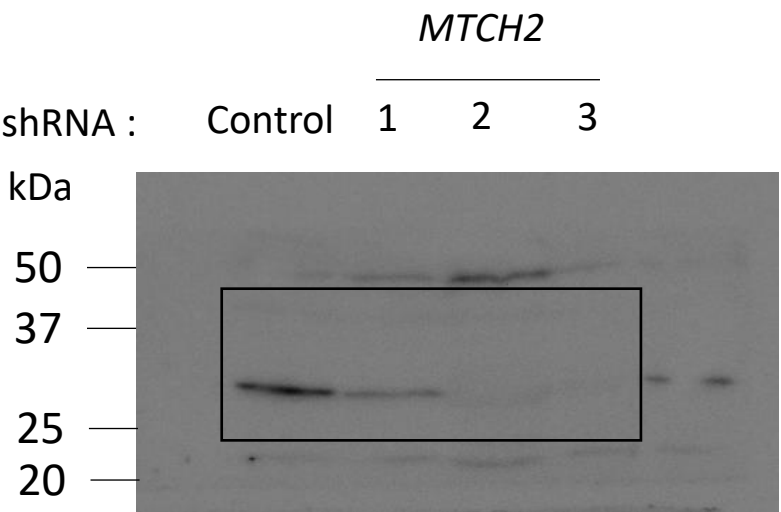

*IB, anti-MTCH2*

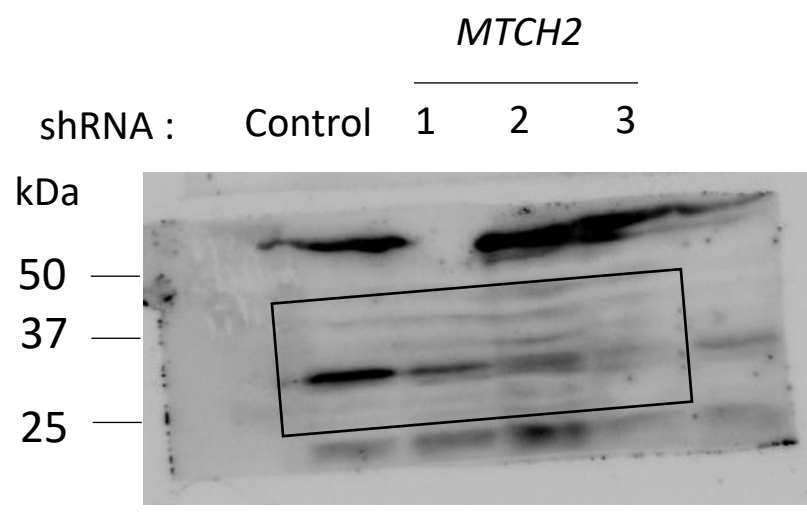

*IB, anti-MTCH2x*

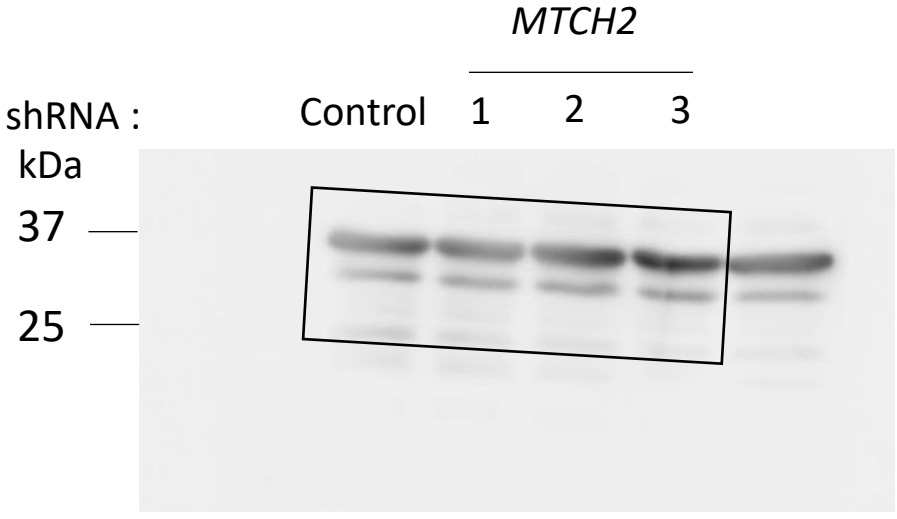

*IB, anti-GAPDH*

**Fig 5C**

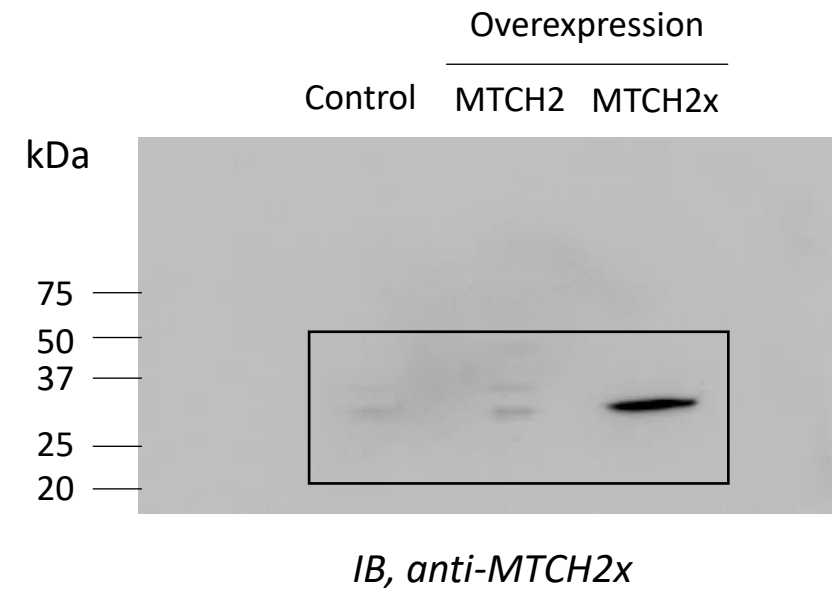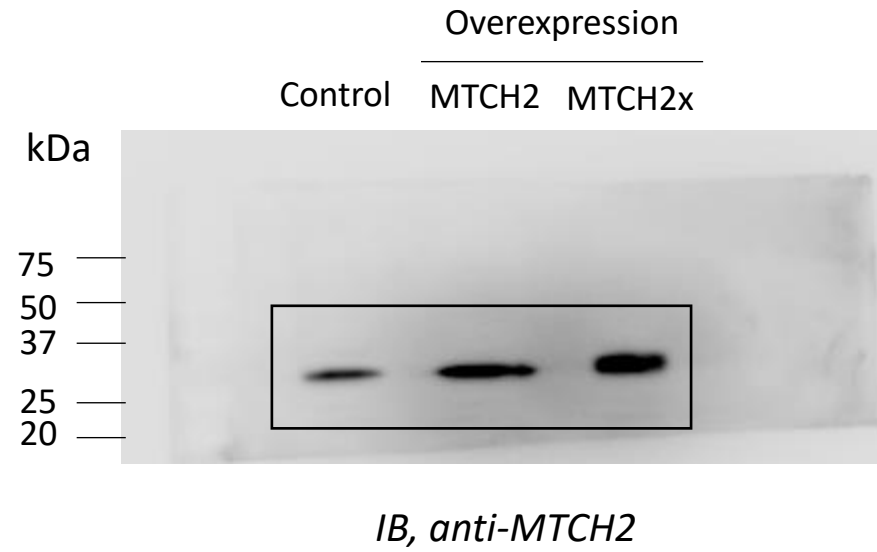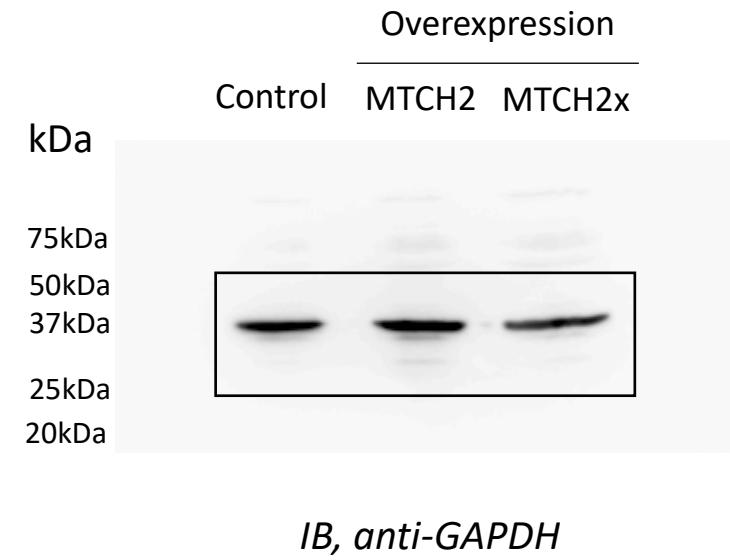



**Fig 5D**

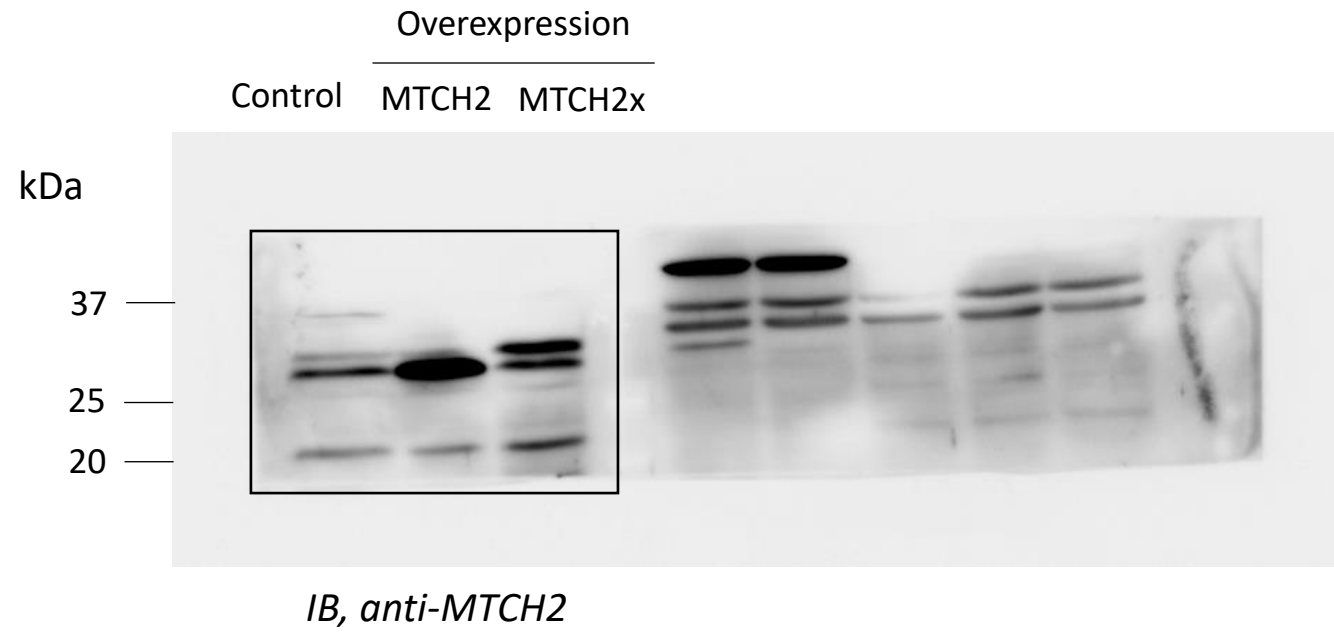

**Fig 5D**

| <b>MTCH2 isoform</b> | <b>Replicate</b> | <b>% of total MTCH2</b> | <b>Average</b> | <b>SD</b>   |
|----------------------|------------------|-------------------------|----------------|-------------|
|                      | 1                | 71.89799287             | 77.51105396    | 6.419683121 |
| <b>MTCH2</b>         | 2                | 76.12443649             |                |             |
|                      | 3                | 84.51073252             |                |             |
|                      | 1                | 28.10200713             | 22.48894604    | 6.419683121 |
| <b>MTCH2x</b>        | 2                | 23.87556351             |                |             |
|                      | 3                | 15.48926748             |                |             |

**Fig 5E**

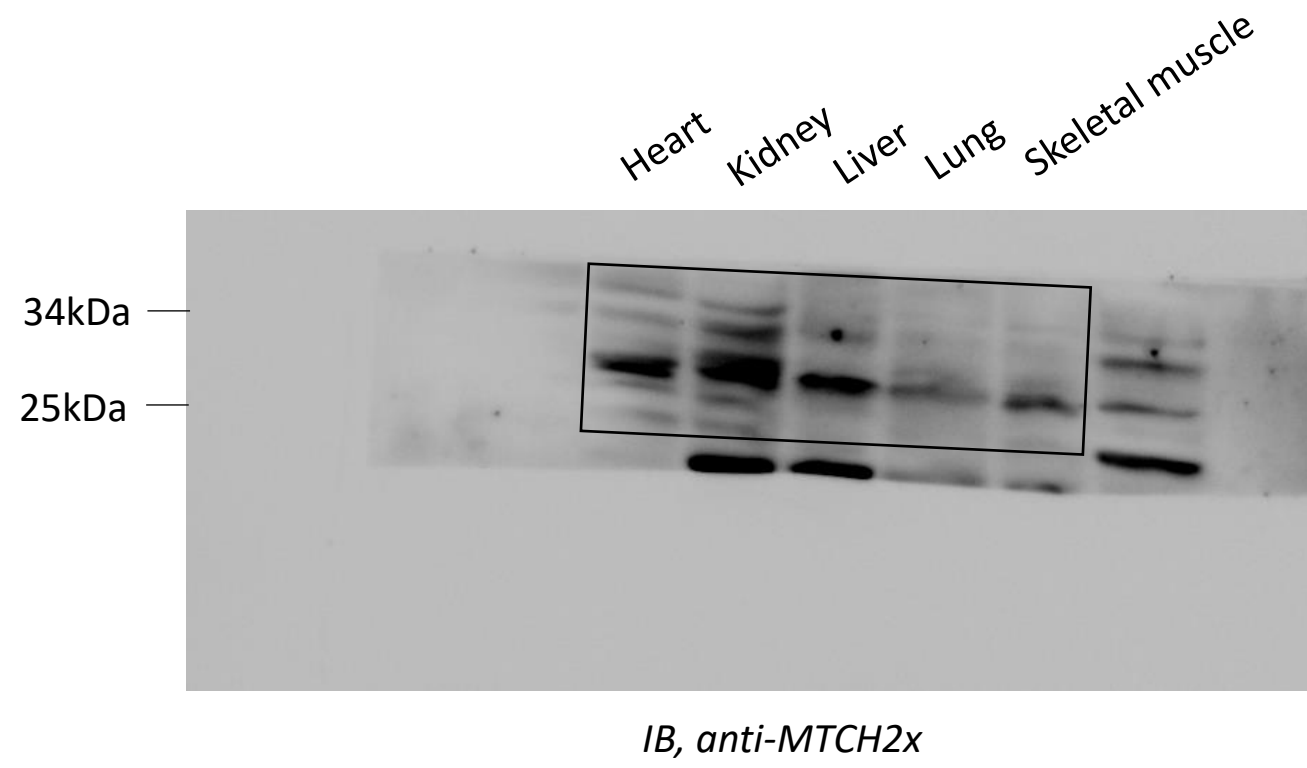

**Fig 6A**

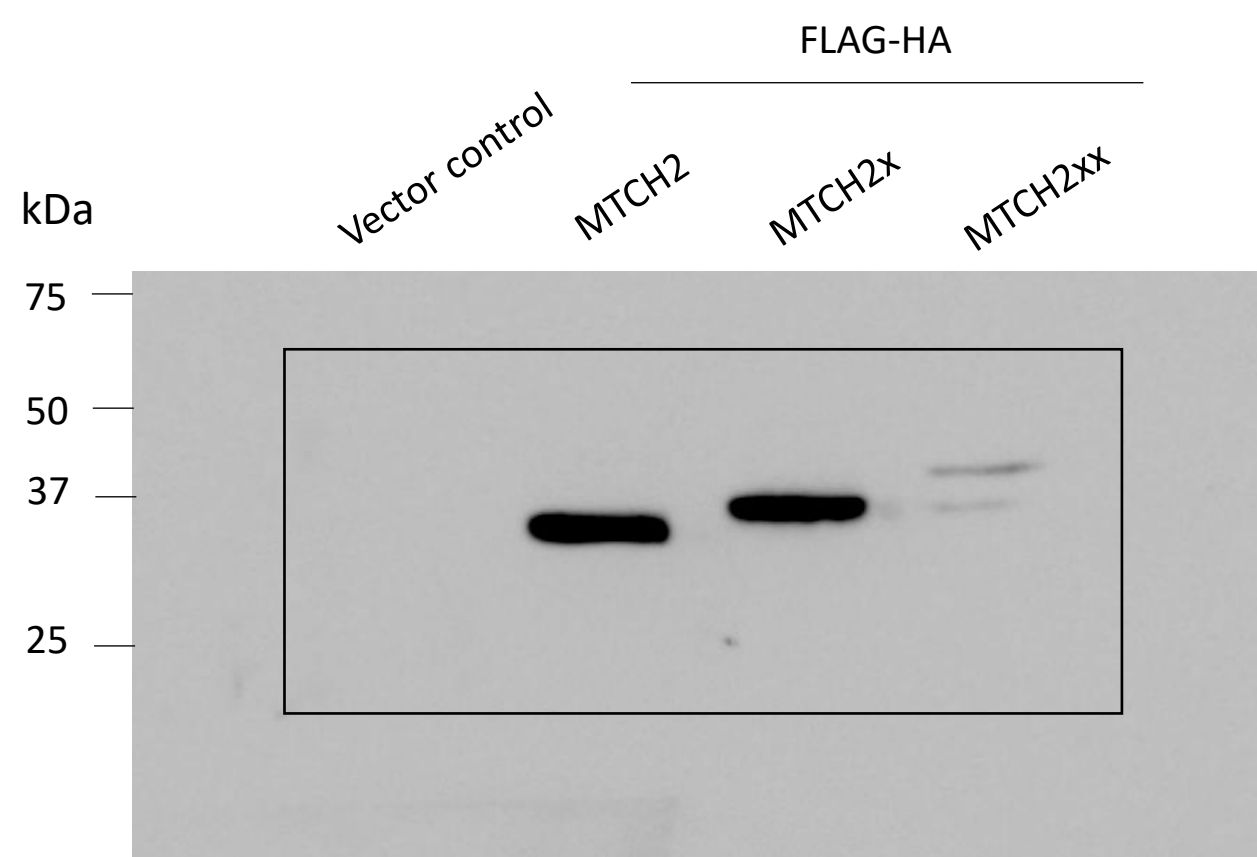

*IB, anti-HA-tag*

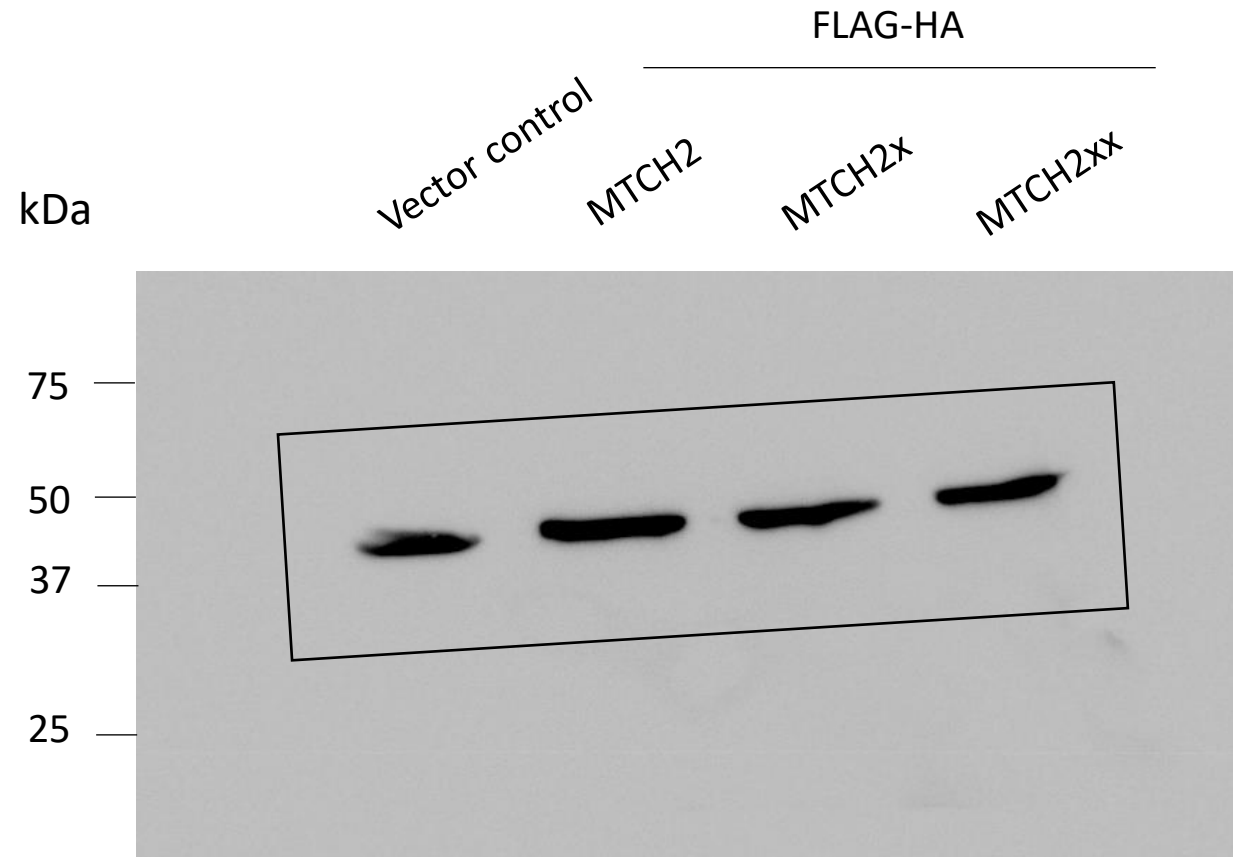

*IB, anti-Actin*

**Fig 6A**

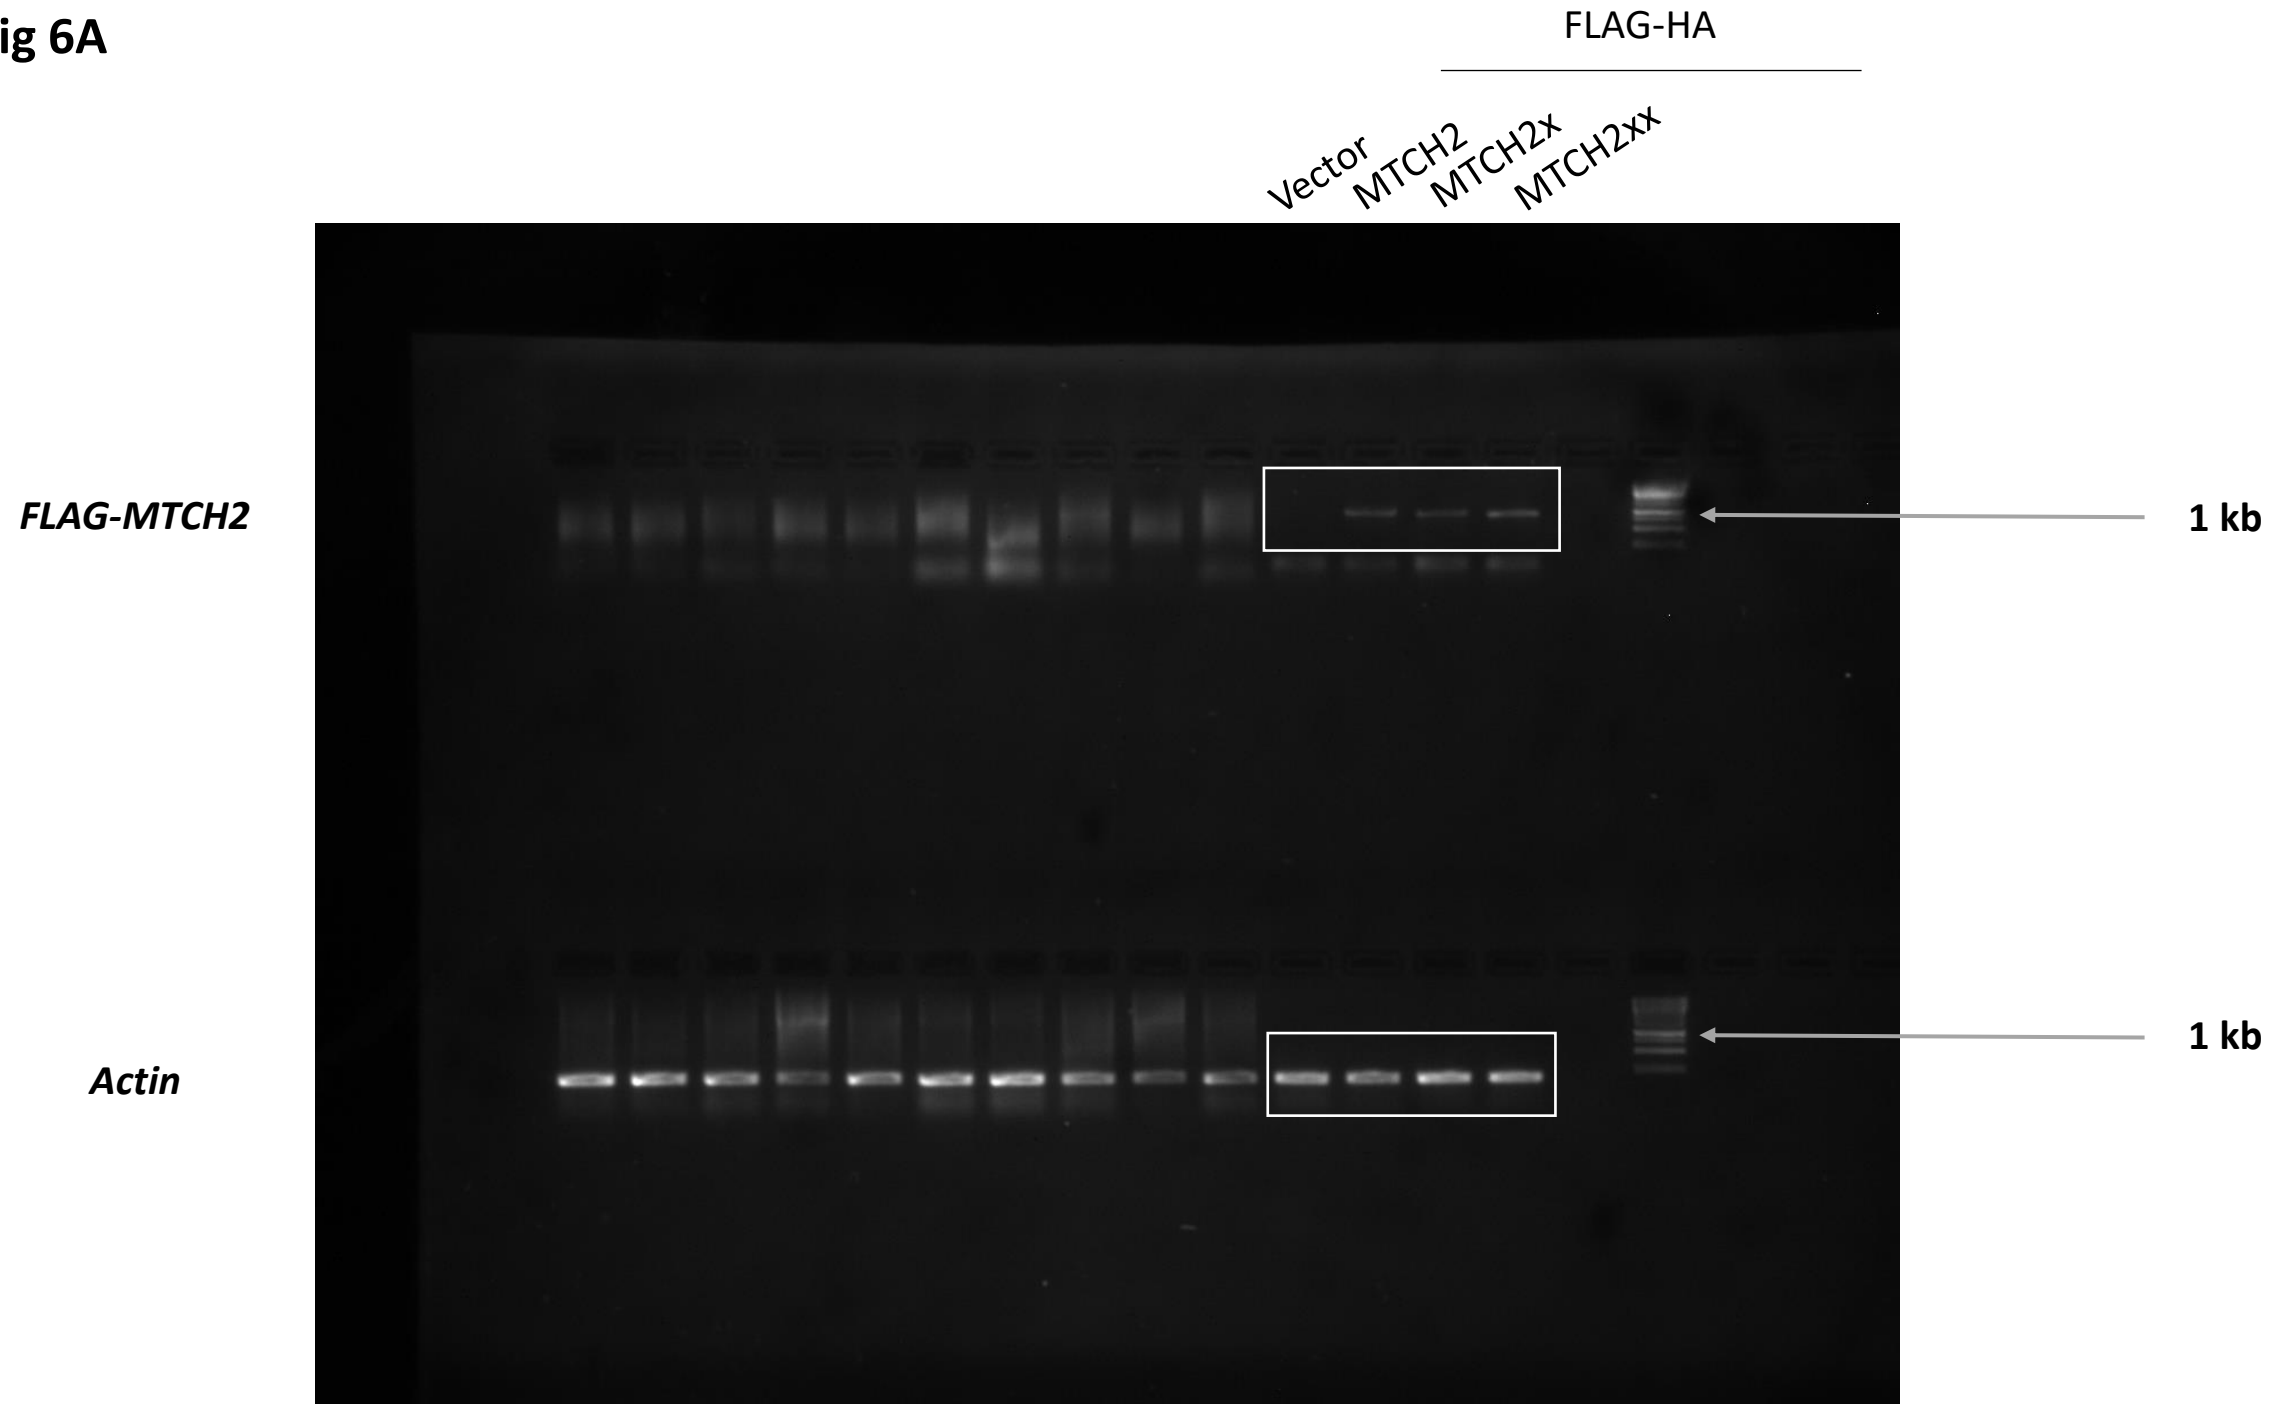

**Fig 6B**

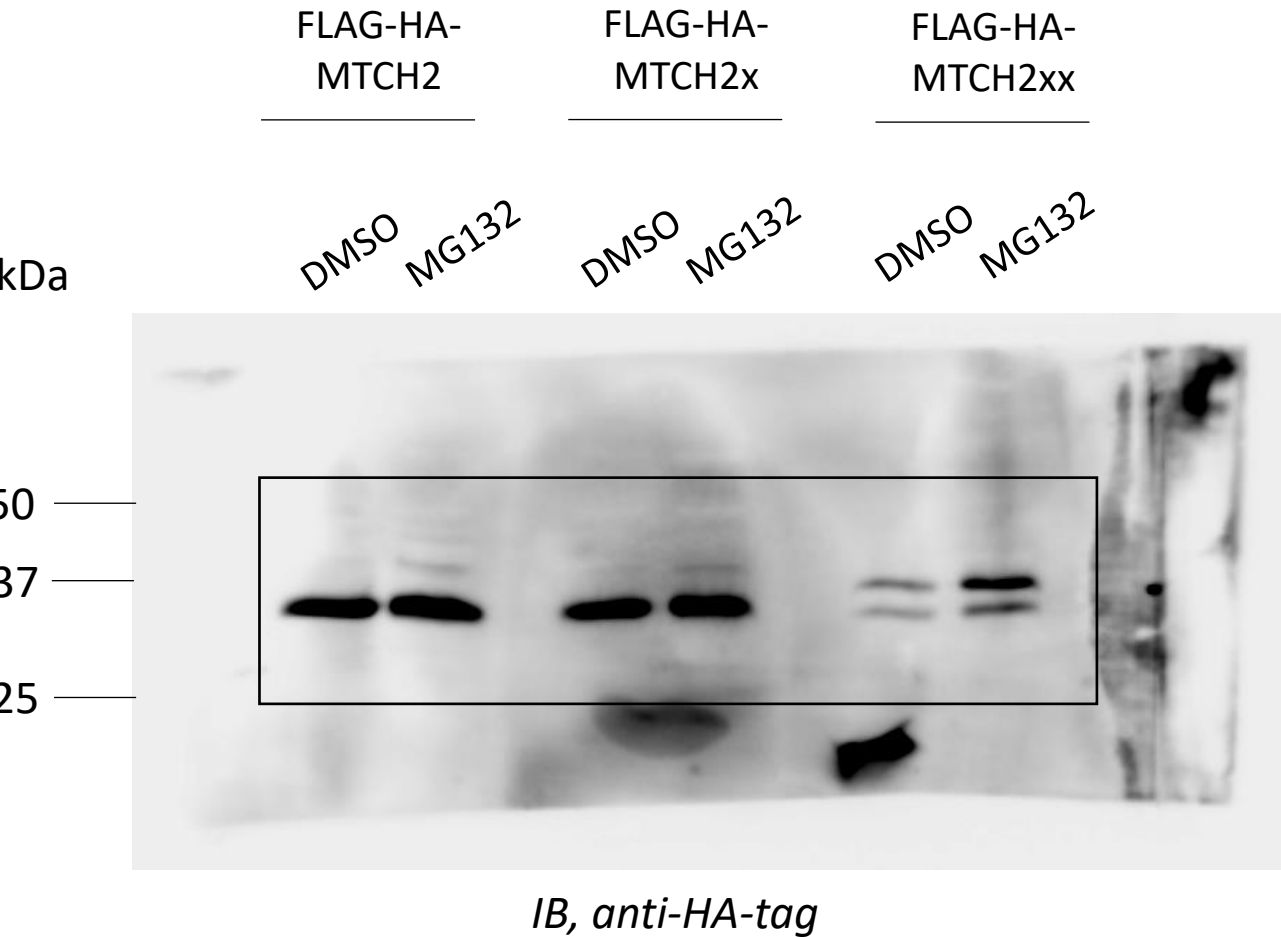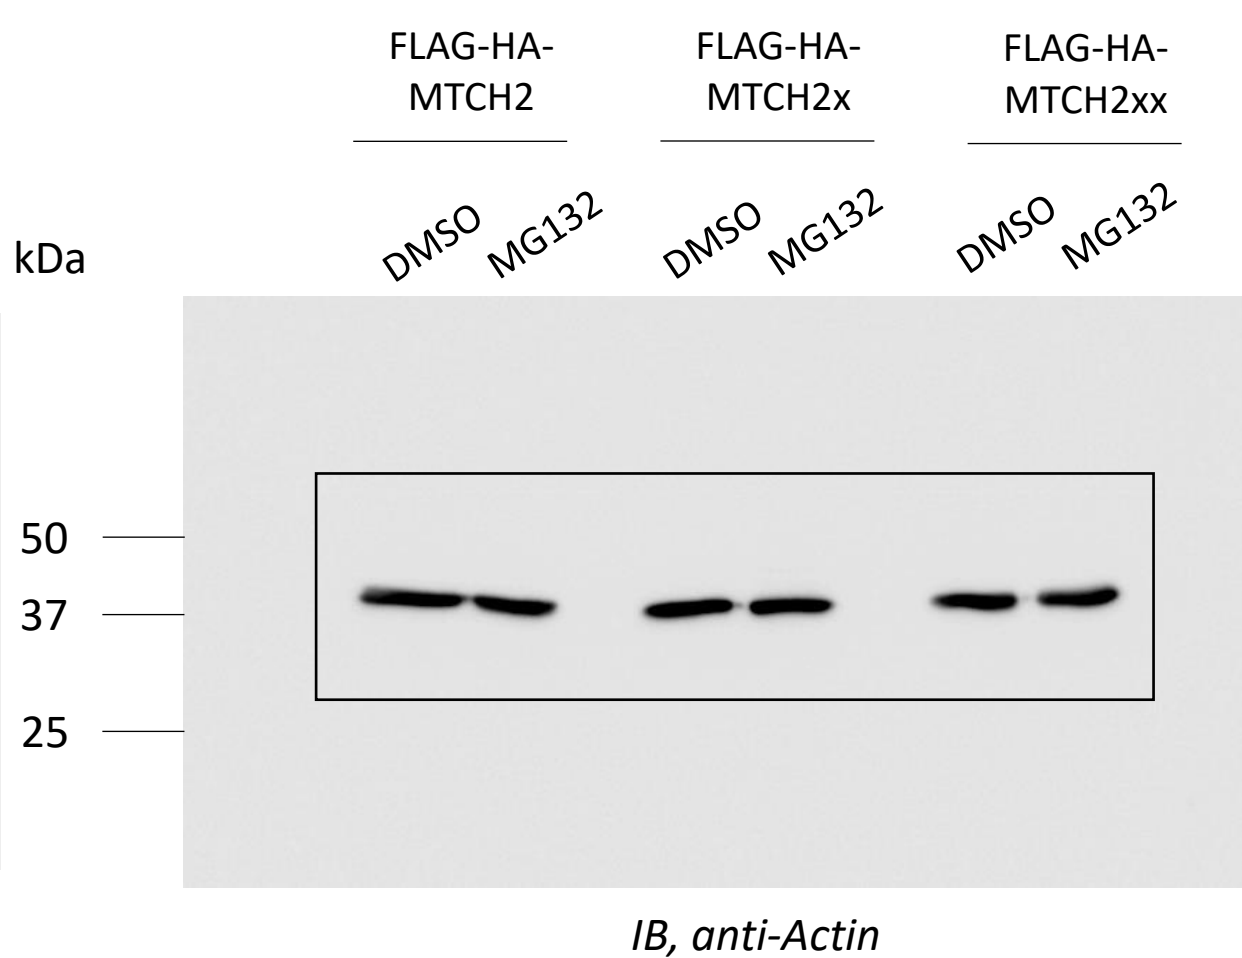

**Fig 6C**

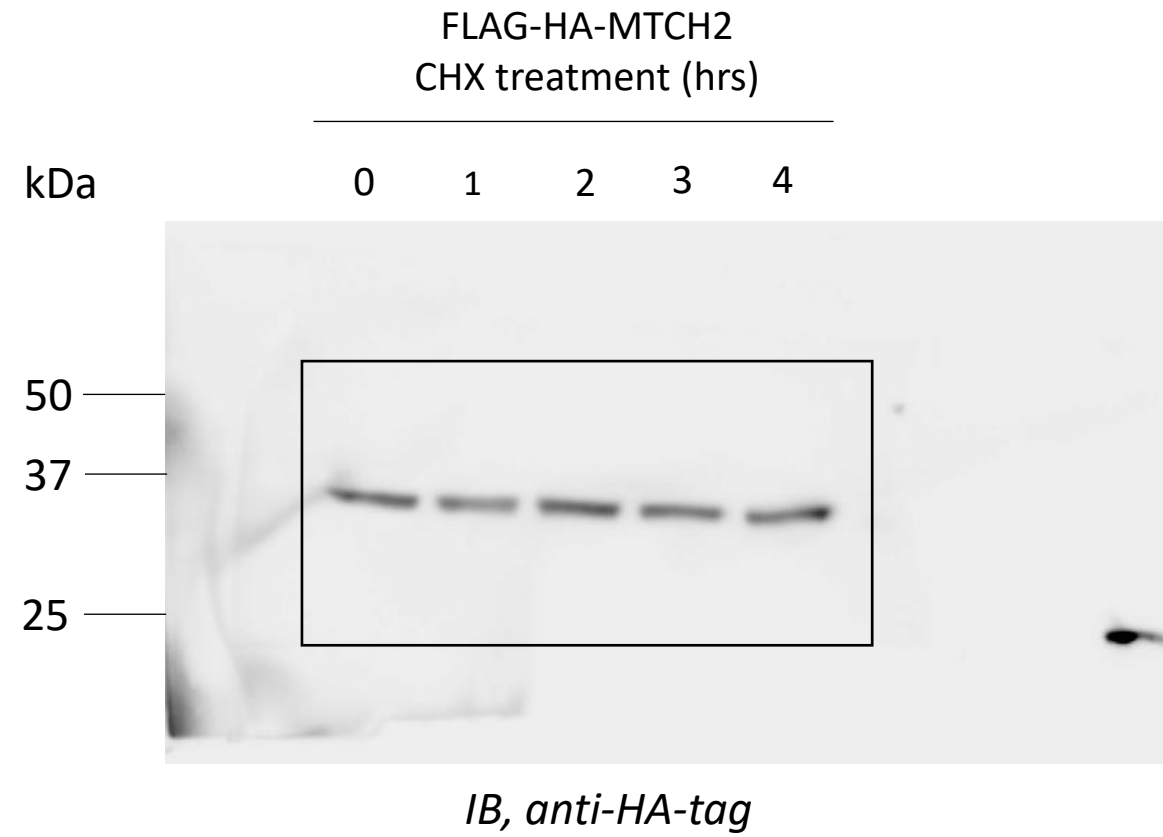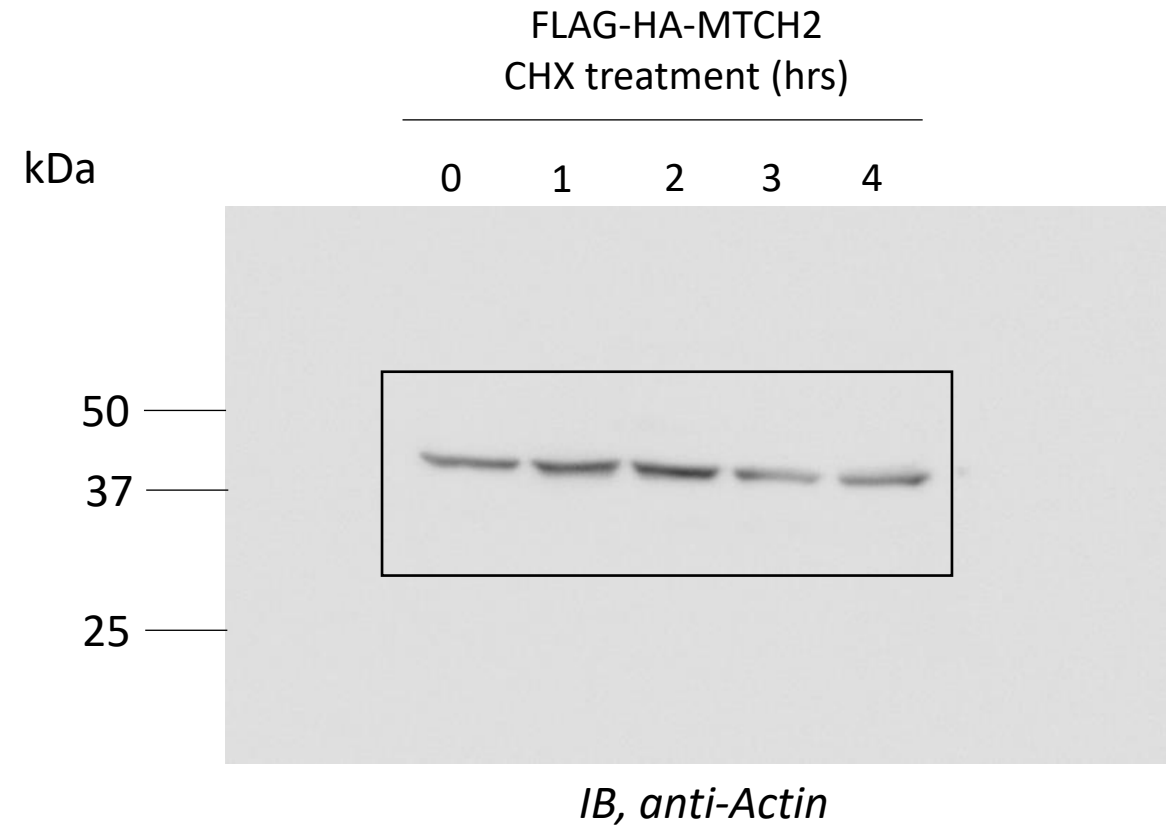

**Fig 6C**

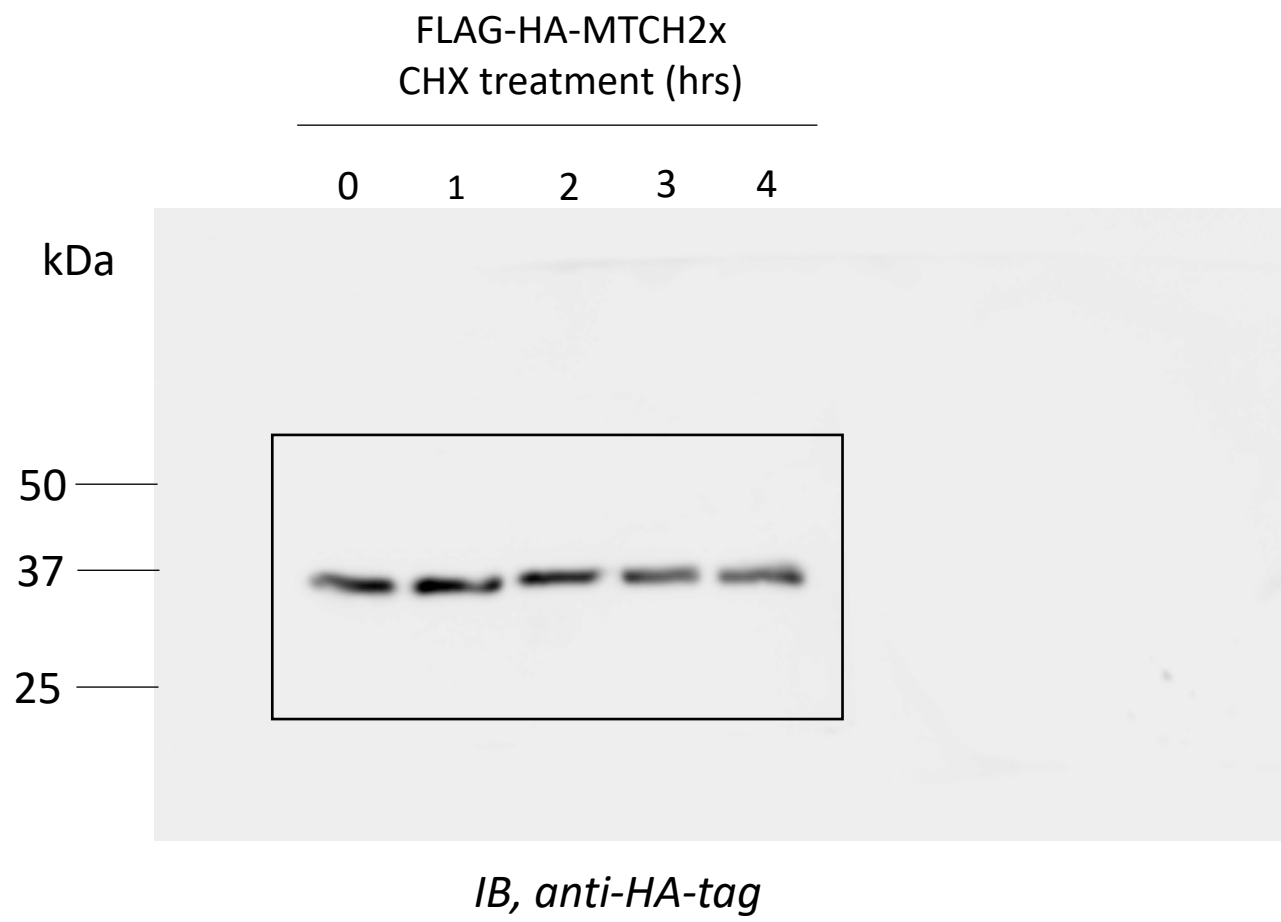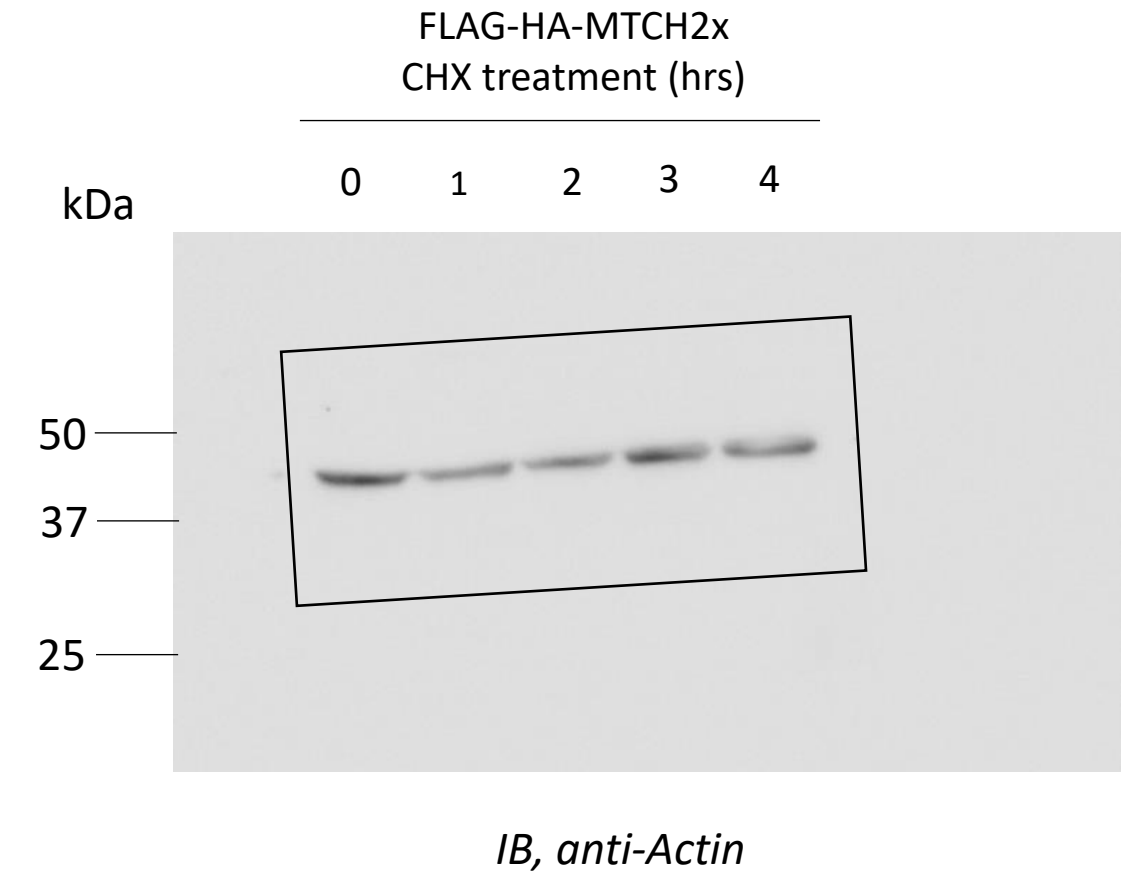



**Fig 6C**

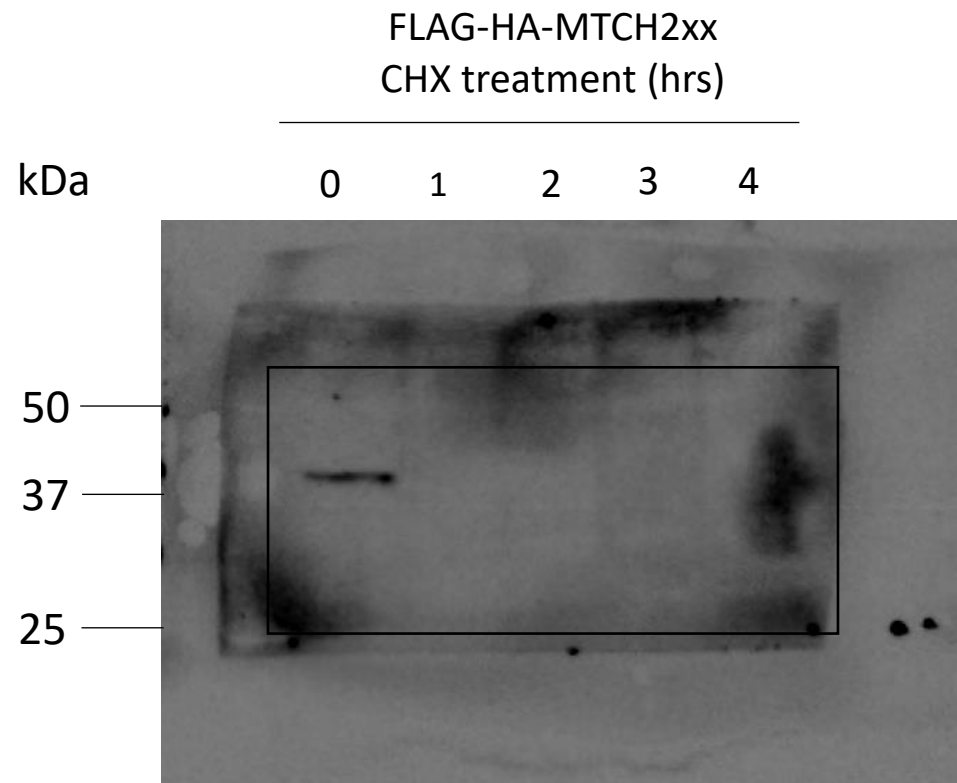

*IB, anti-HA-tag*

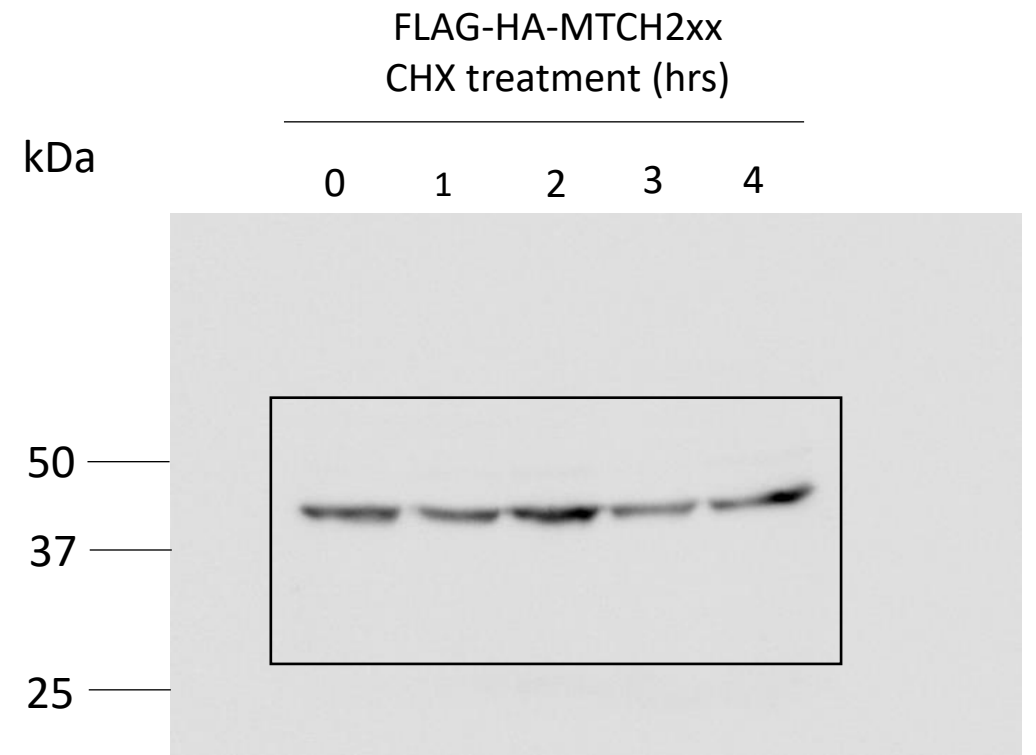

*IB, anti-Actin*

**Fig 6D**

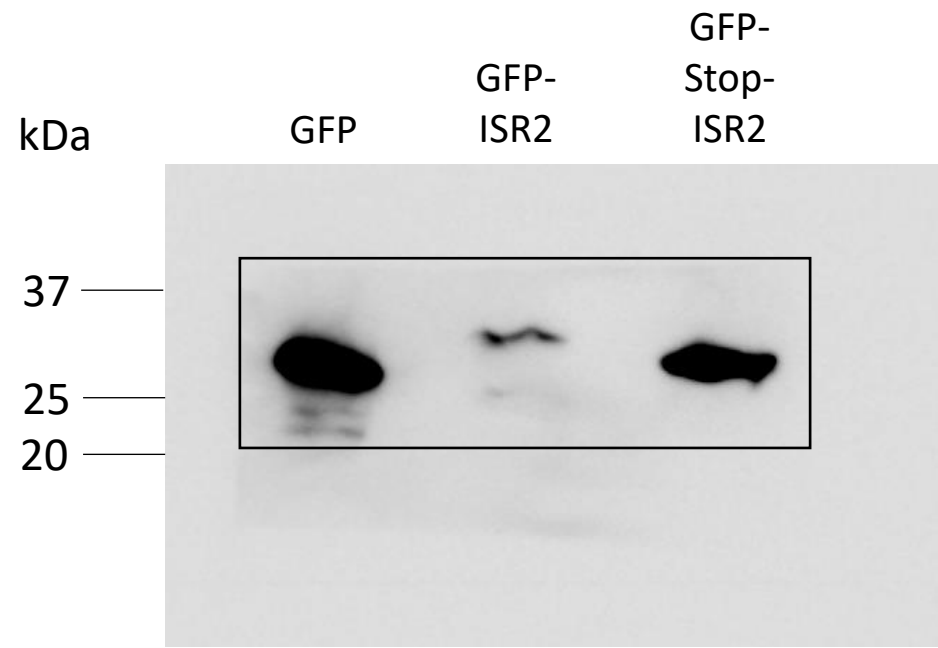

*IB, anti-GFP*

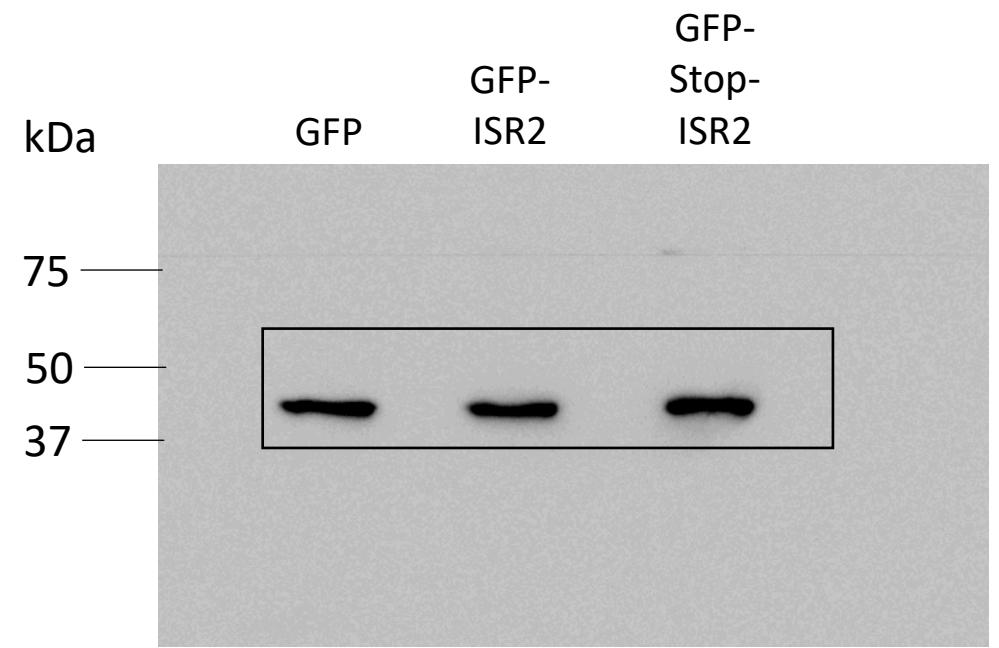

*IB, anti-Actin*

**Fig 6D**

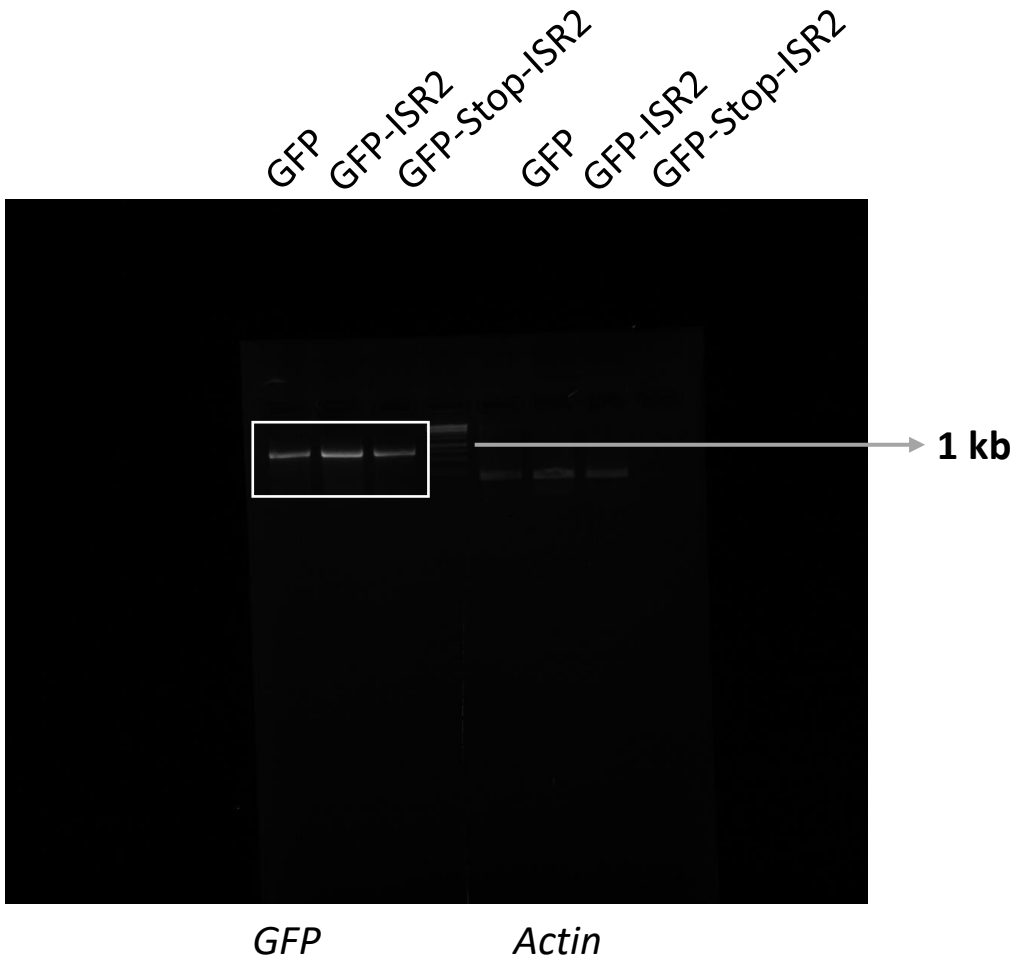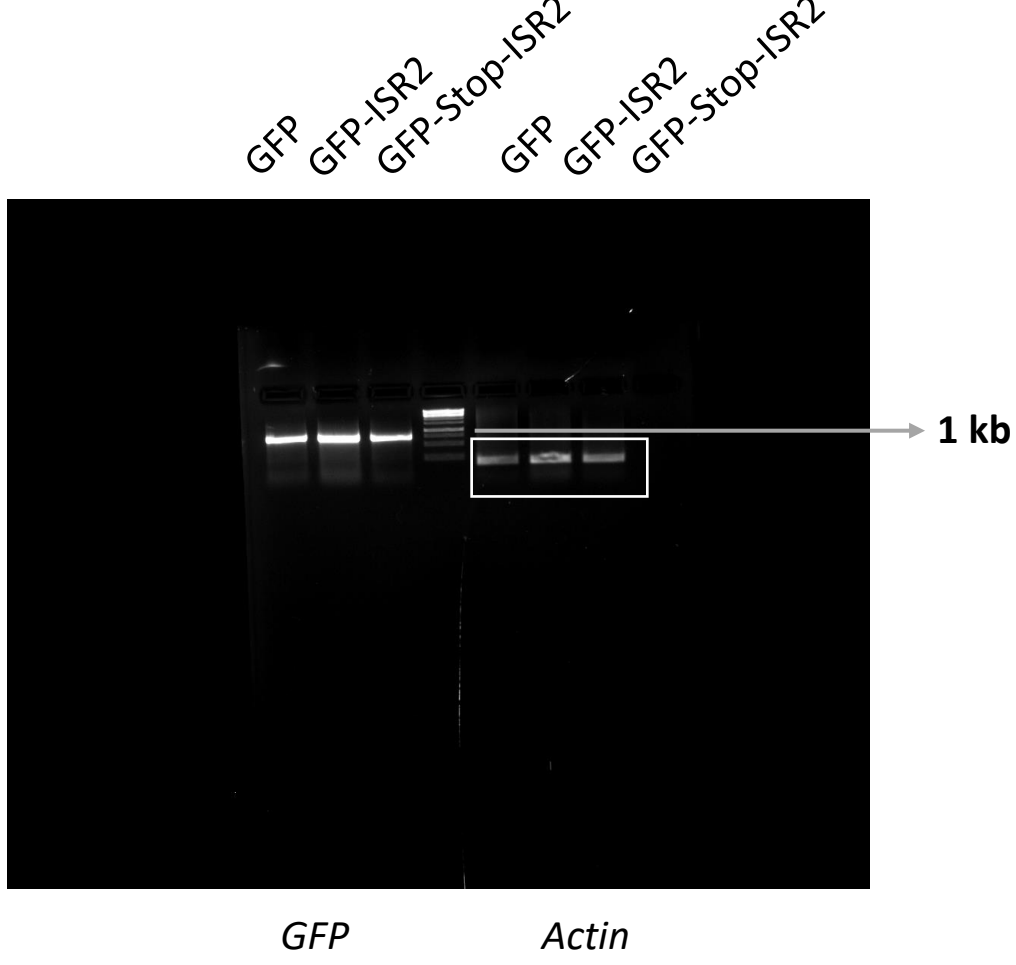

**Fig 6E**

| <b>Sample</b>              | <b>Replicate</b> | <b>%GFP positive cells</b> | <b>Average</b> | <b>SD</b>   |
|----------------------------|------------------|----------------------------|----------------|-------------|
| <b>GFP</b>                 | 1                | 19.14                      | 18.69666667    | 0.650410127 |
|                            | 2                | 19                         |                |             |
|                            | 3                | 17.95                      |                |             |
| <b>GFP-ISR2</b>            | 1                | 2.5                        | 2.05           | 0.392300905 |
|                            | 2                | 1.78                       |                |             |
|                            | 3                | 1.87                       |                |             |
| <b>GFP-Stop-ISR2</b>       | 1                | 24.68                      | 20.85333333    | 3.578412125 |
|                            | 2                | 17.59                      |                |             |
|                            | 3                | 20.29                      |                |             |
|                            |                  |                            |                |             |
| P value                    |                  |                            |                |             |
| GFP and GFP-ISR2           |                  | <0.001                     |                |             |
| GFP-ISR2 and GFP-Stop-ISR2 |                  | <0.001                     |                |             |

**Fig 6E**

GFP

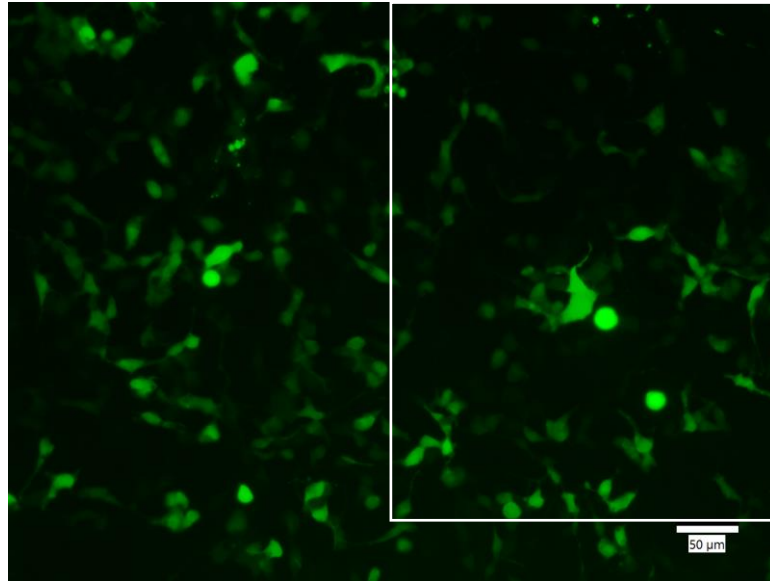

GFP-ISR2

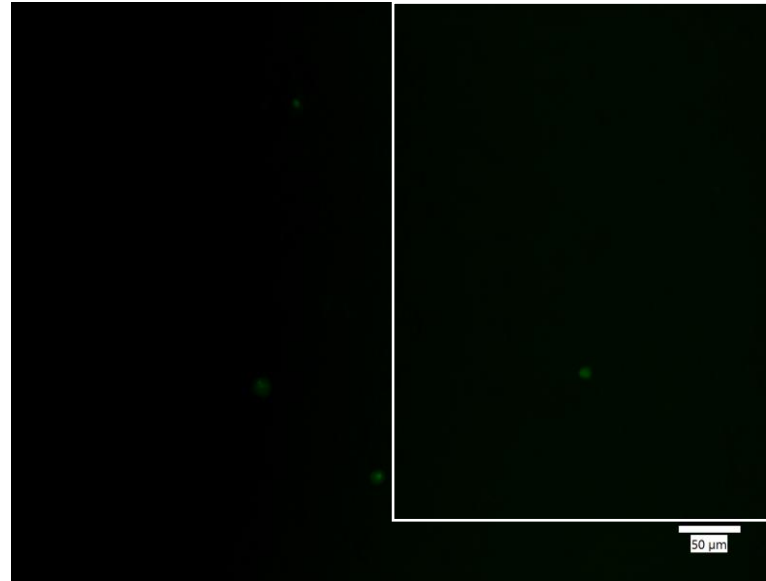

GFP-Stop-ISR2

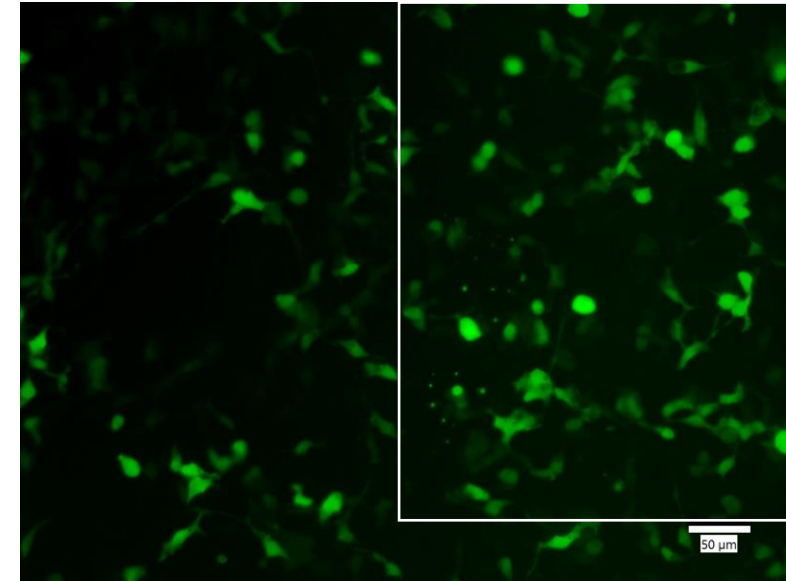

**Fig 6F**

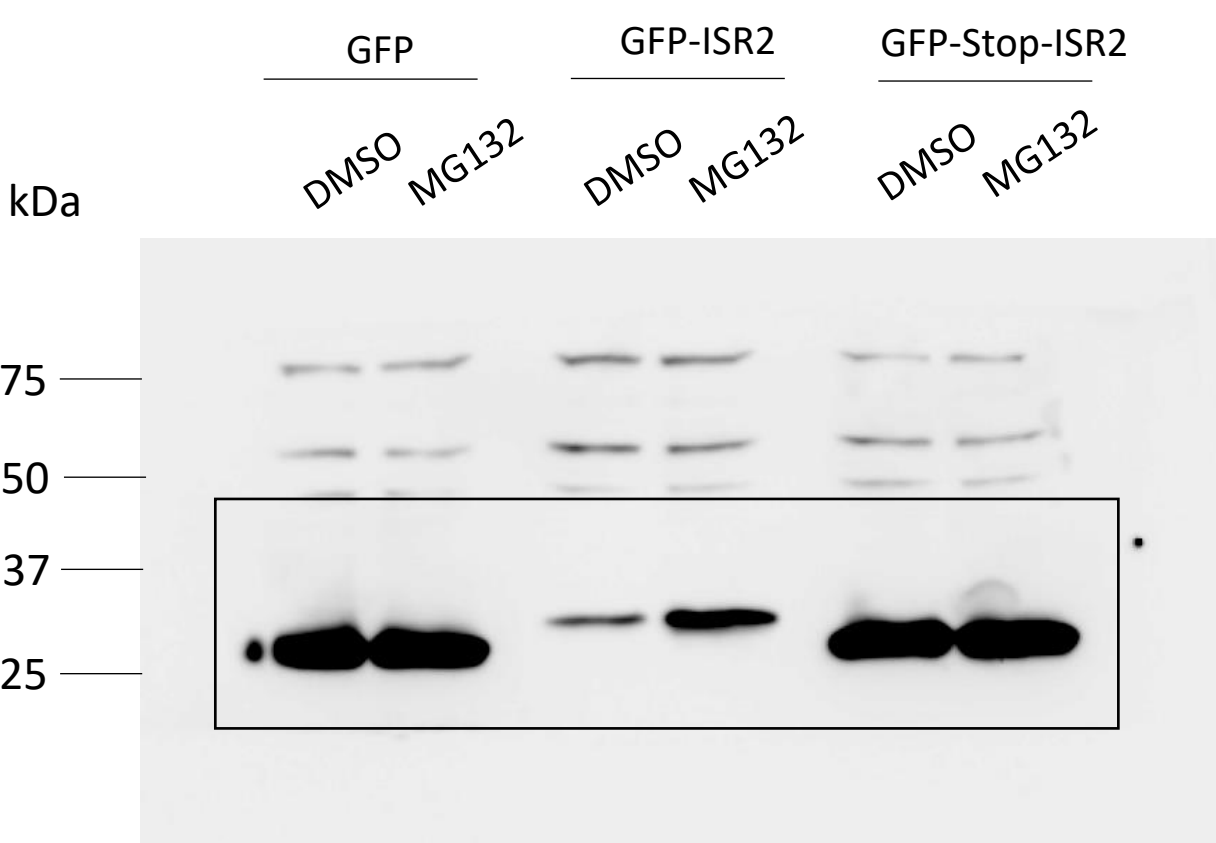

*IB, anti-GFP*

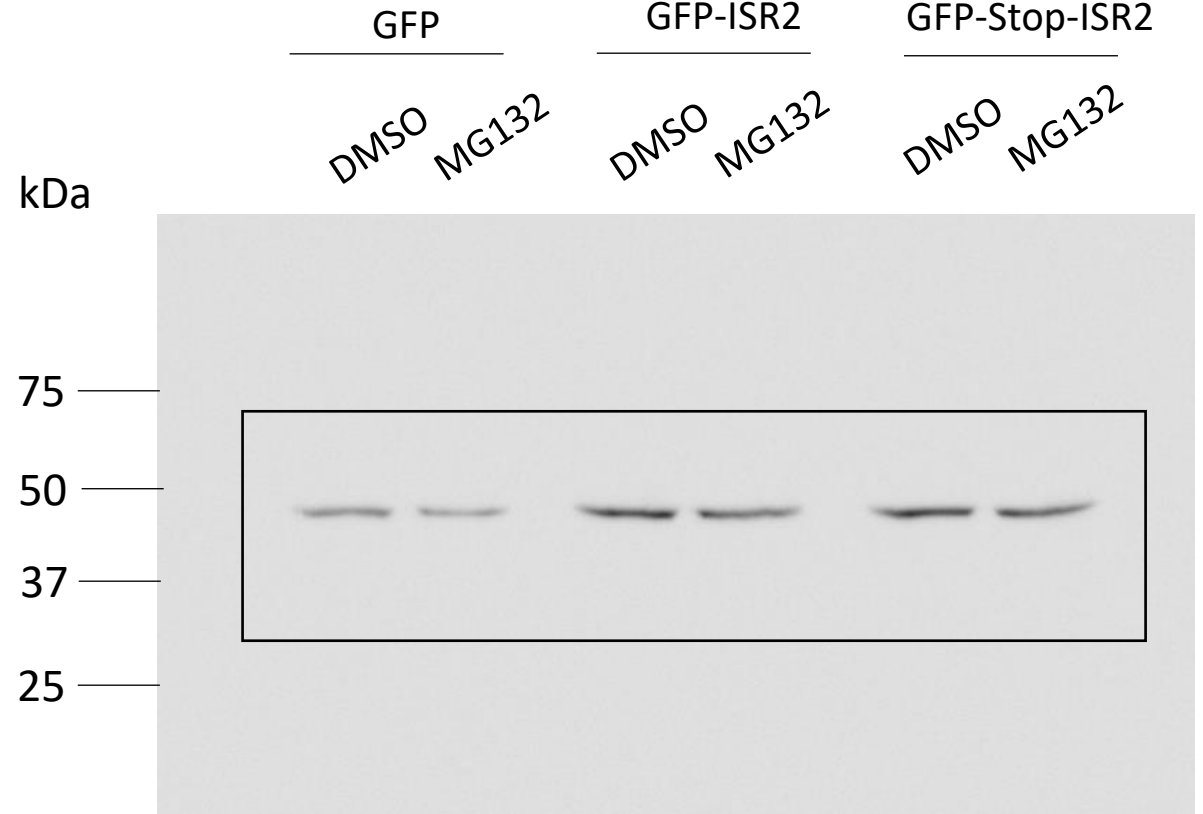

*IB, anti-Actin*

**Fig 7A**

**Mitochondrial fraction**

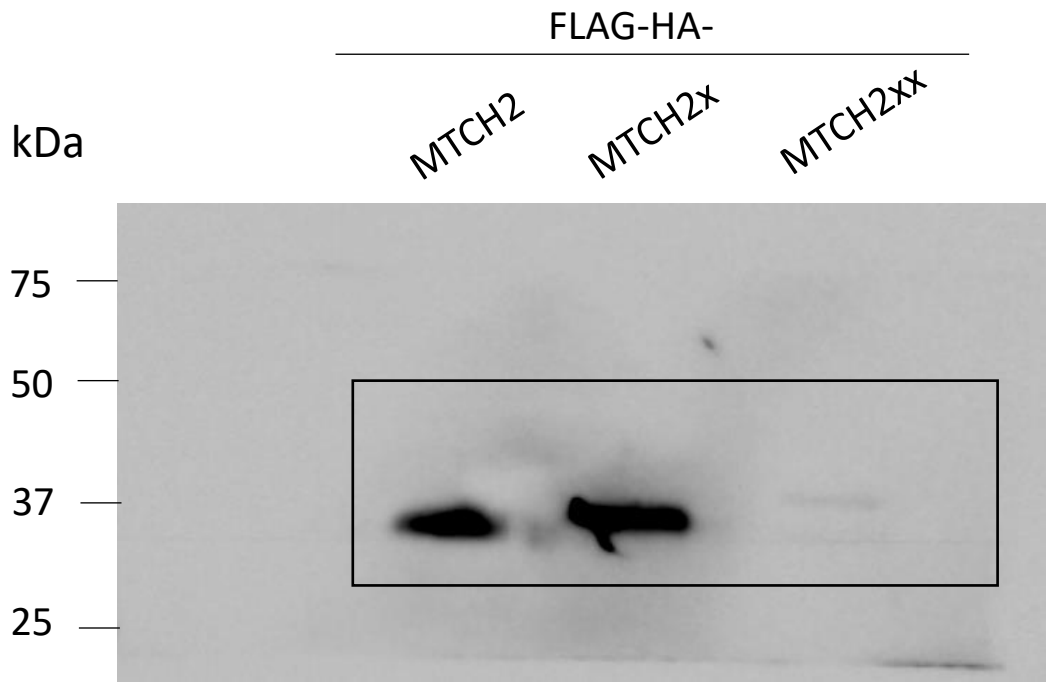

*IB, anti-HA-tag*

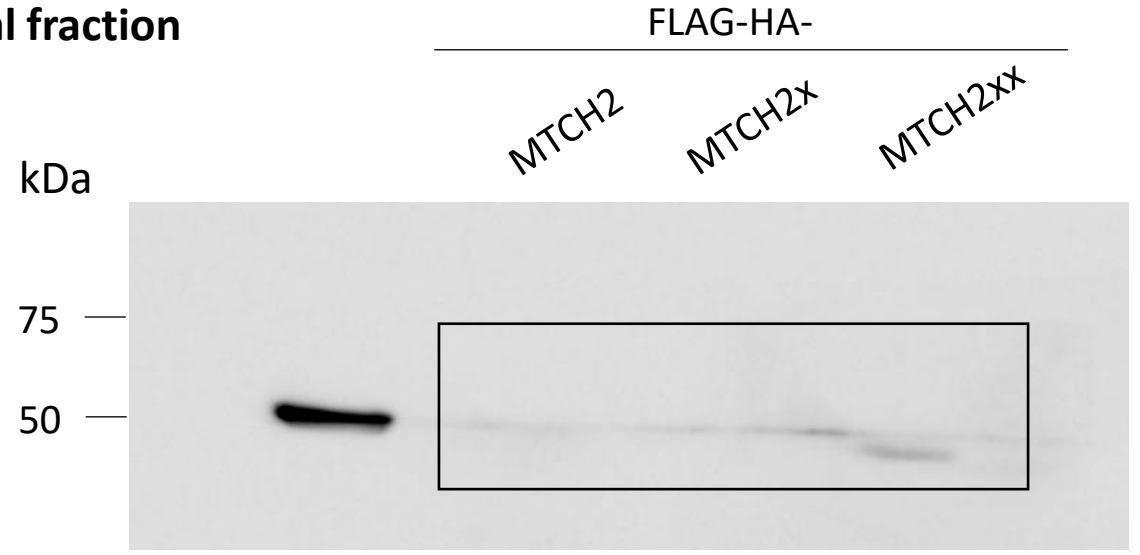

*IB, anti- $\alpha$ -Tubulin*

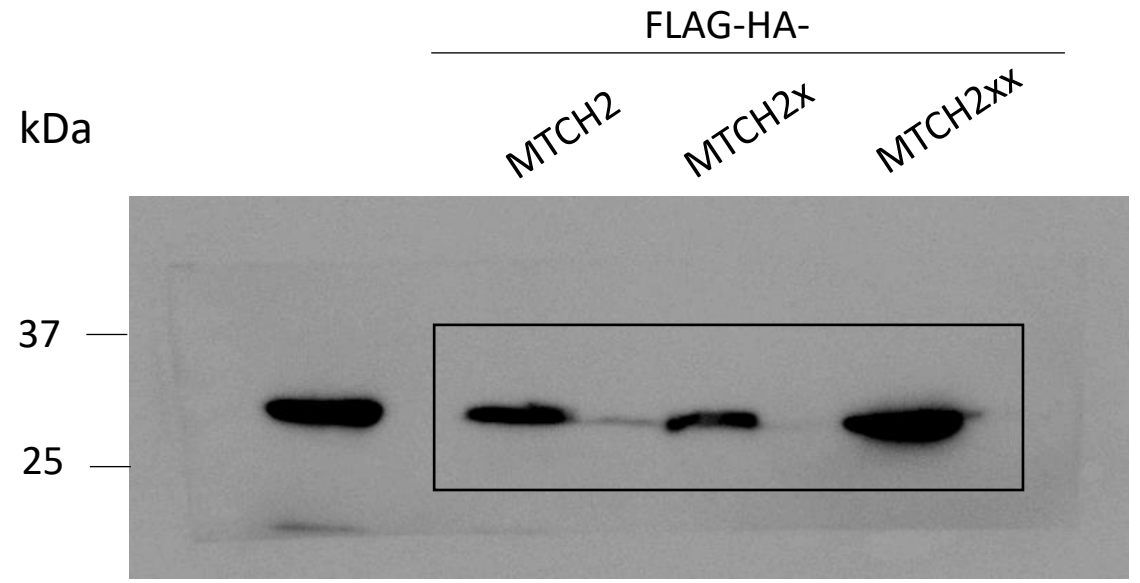

*IB, anti-VDAC*

**Fig 7A**

**Cytosolic fraction**

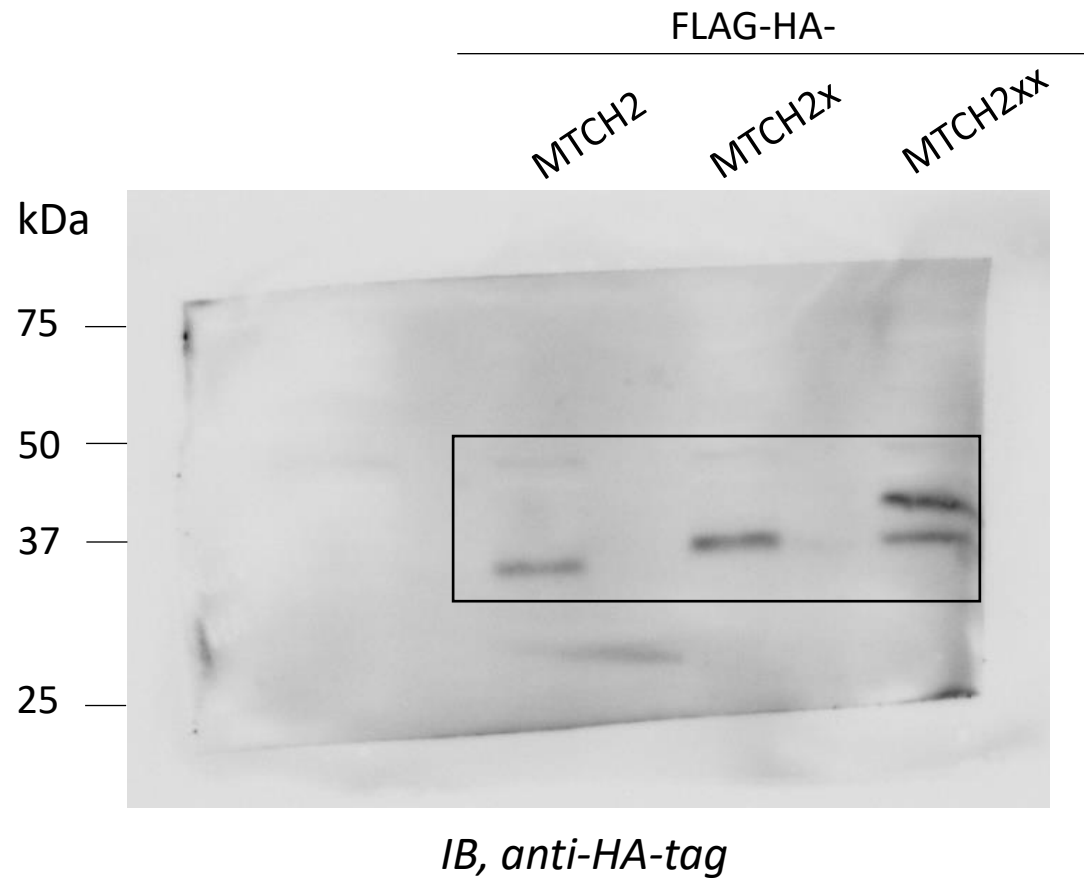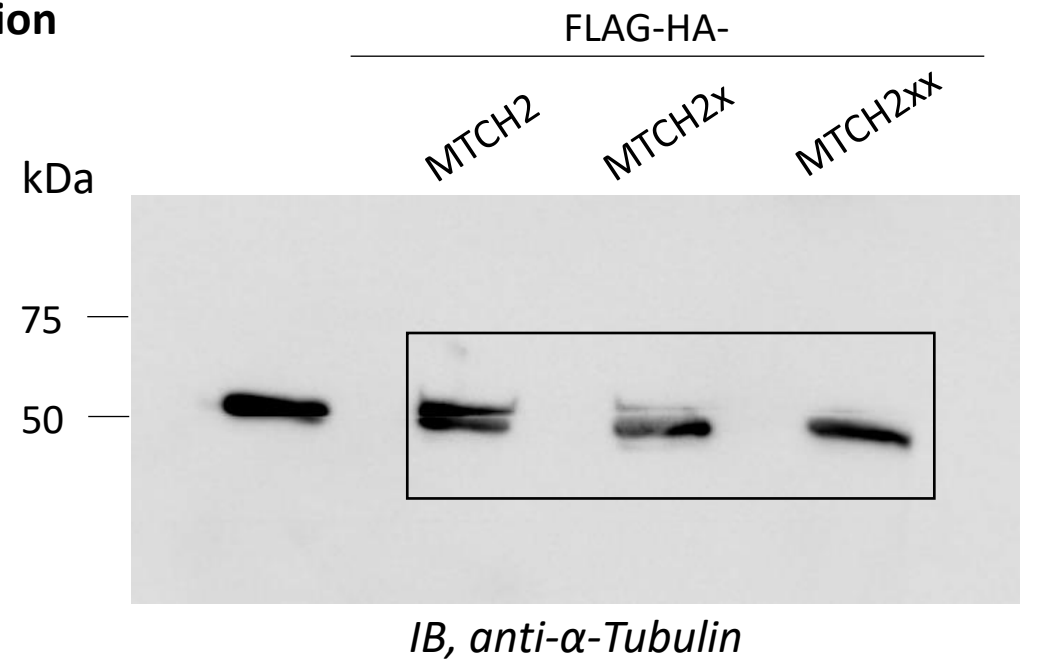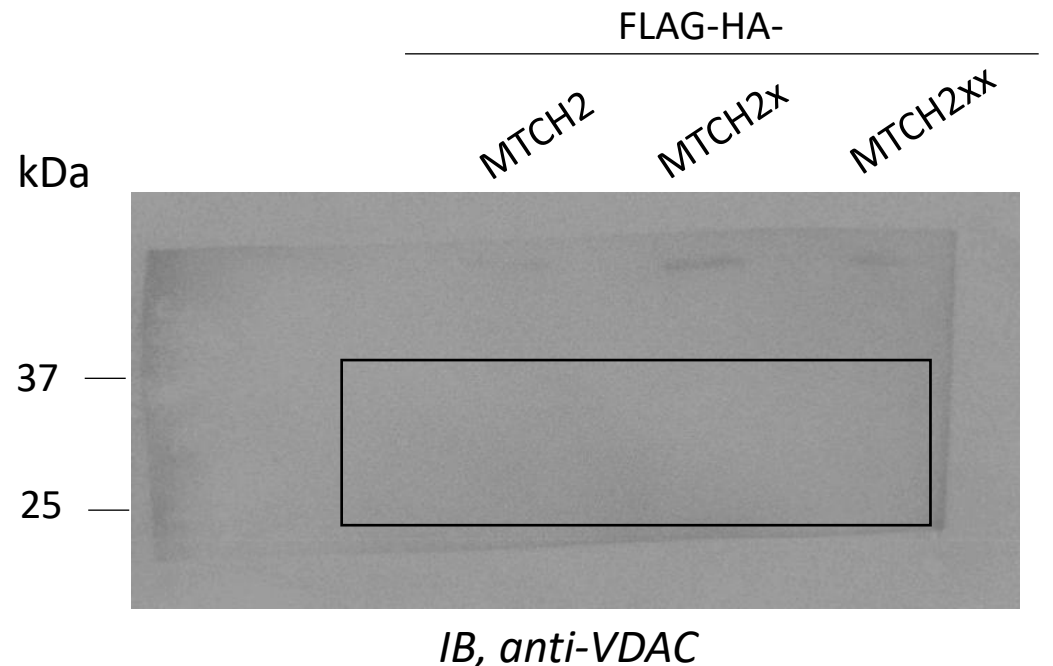



**Fig 7B**

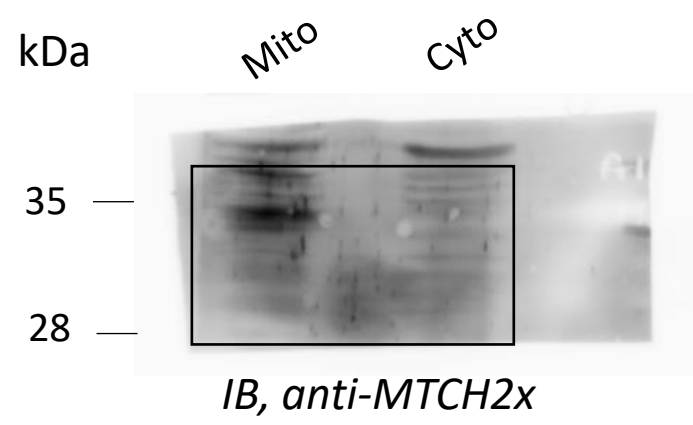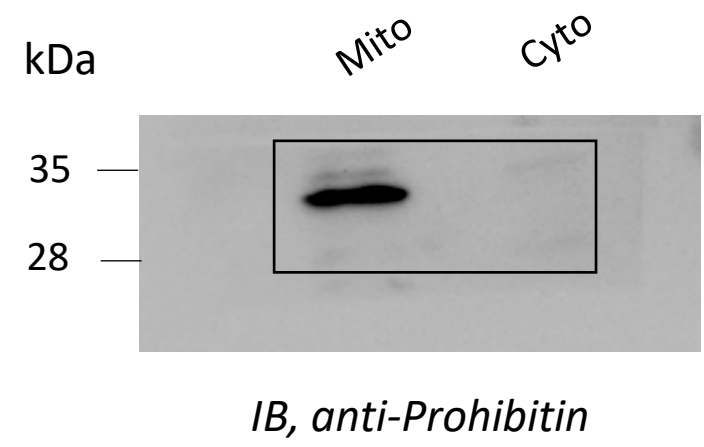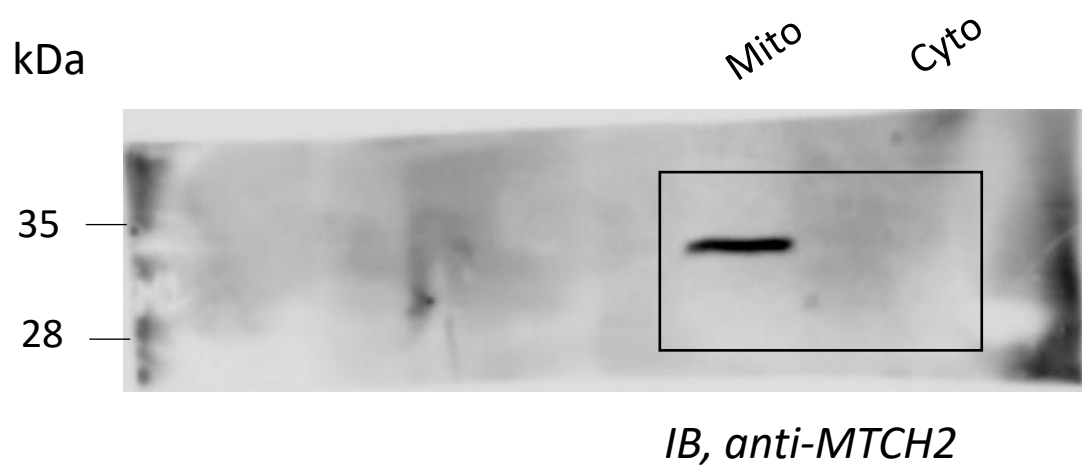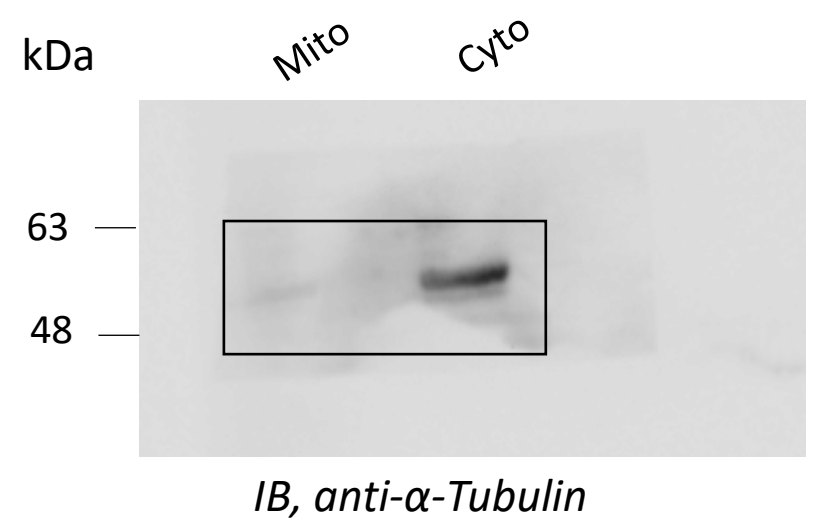

Fig 7C

GFP-MTCH2

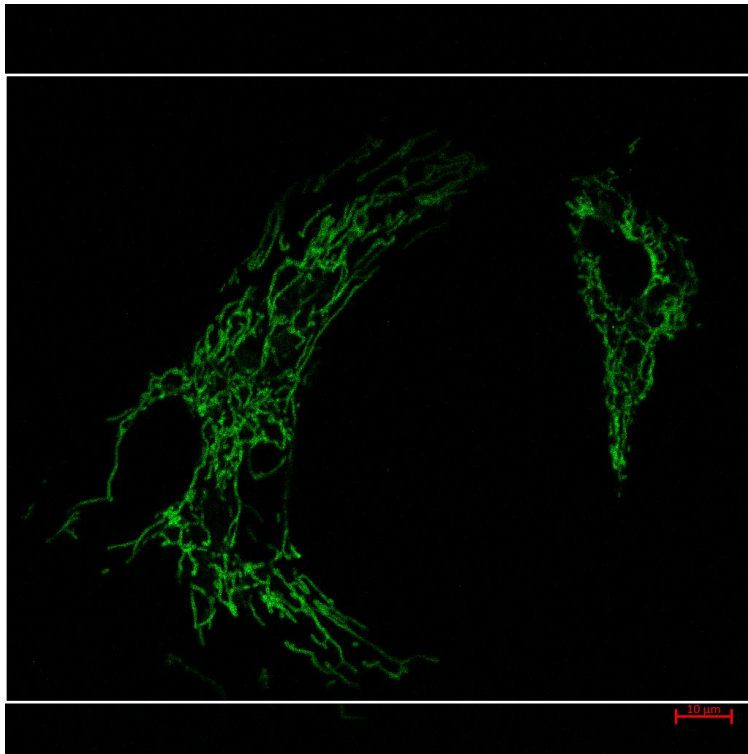

MitoTracker Red CMXRos

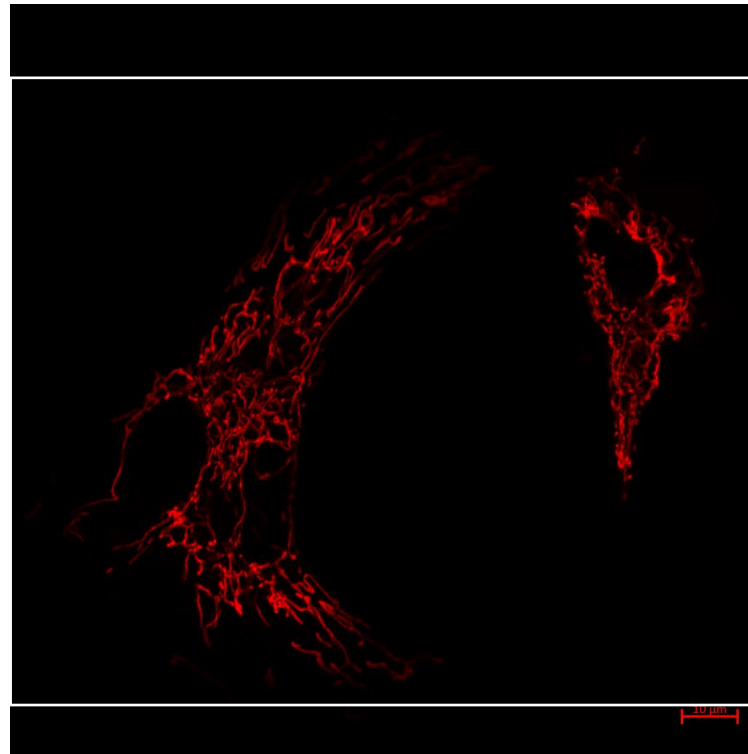

Overlay

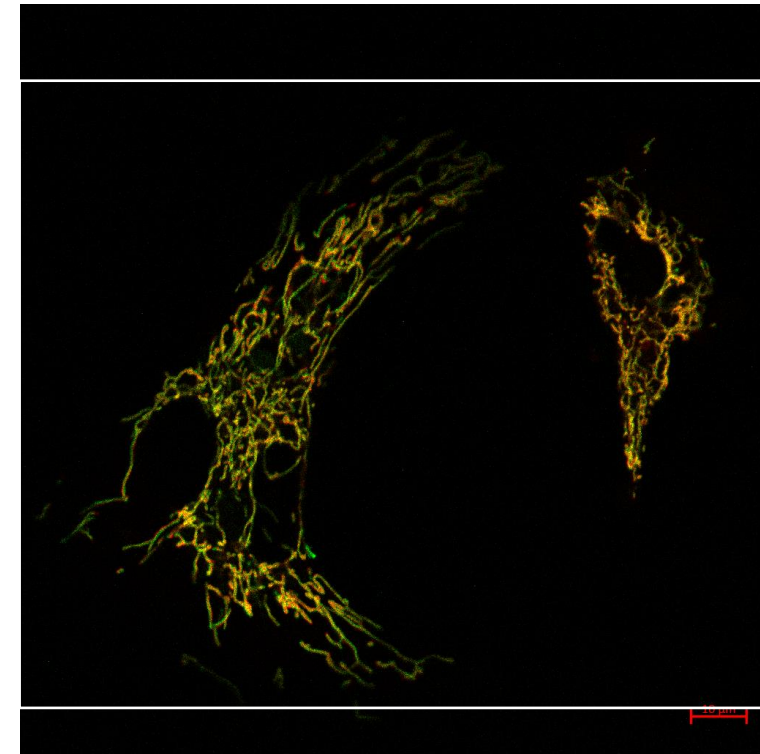

Fig 7C

GFP-MTCH2

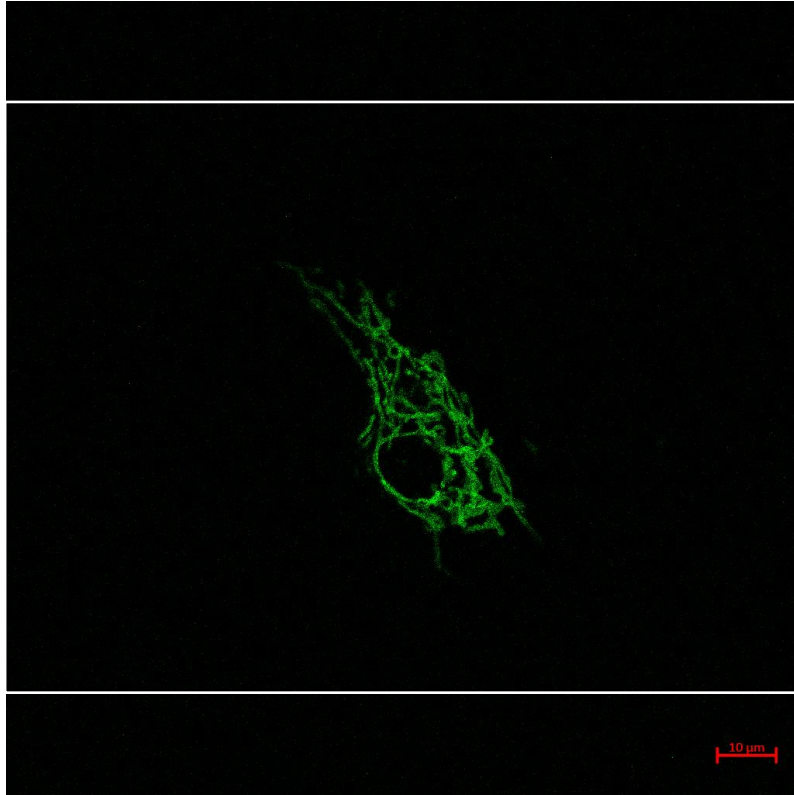

MitoTracker Red CMXRos

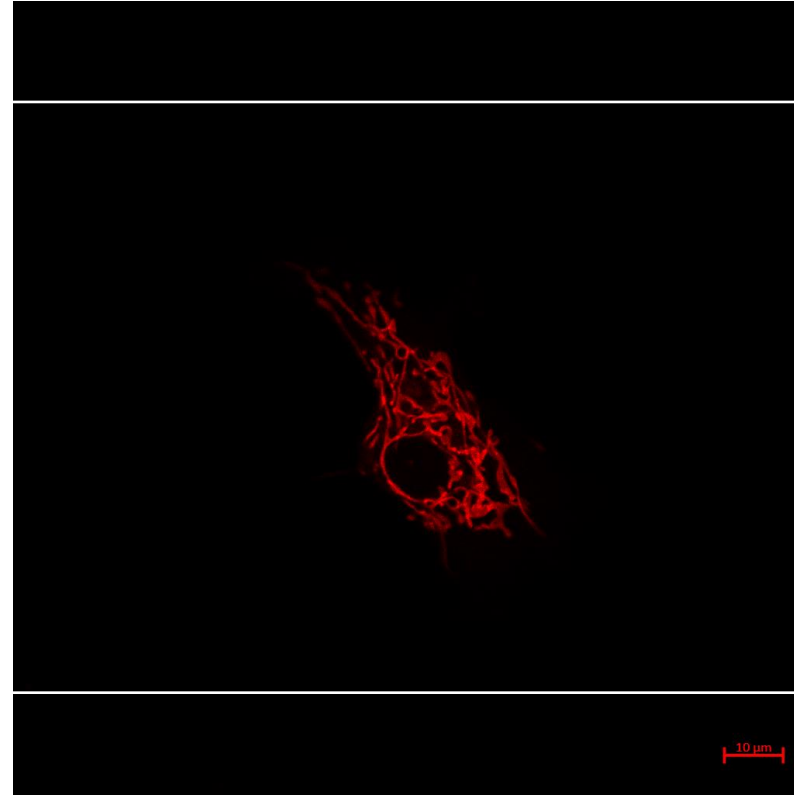

Overlay

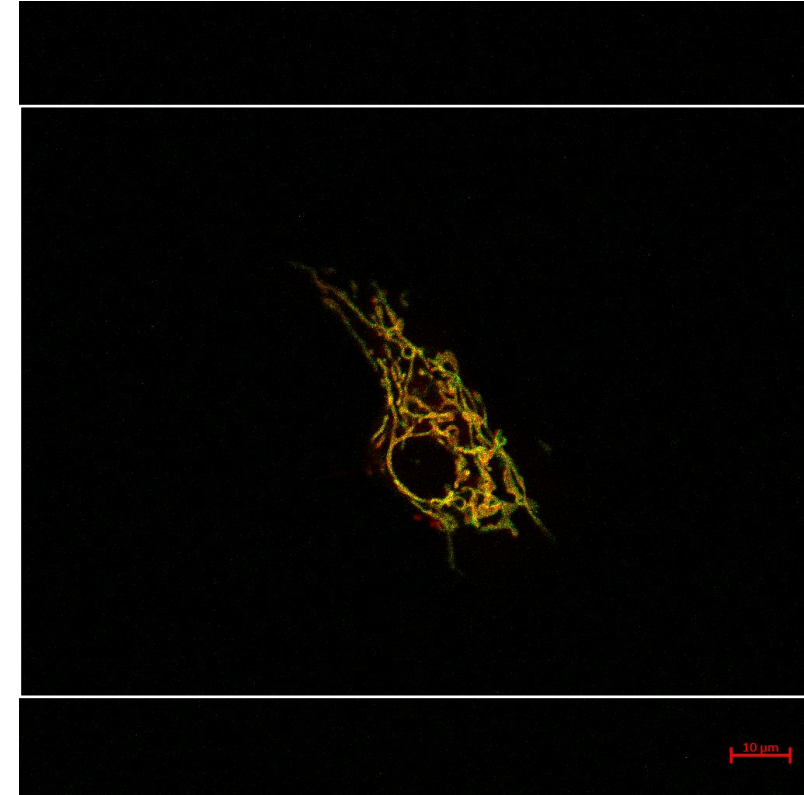

Fig 7C

GFP-MTCH2xx

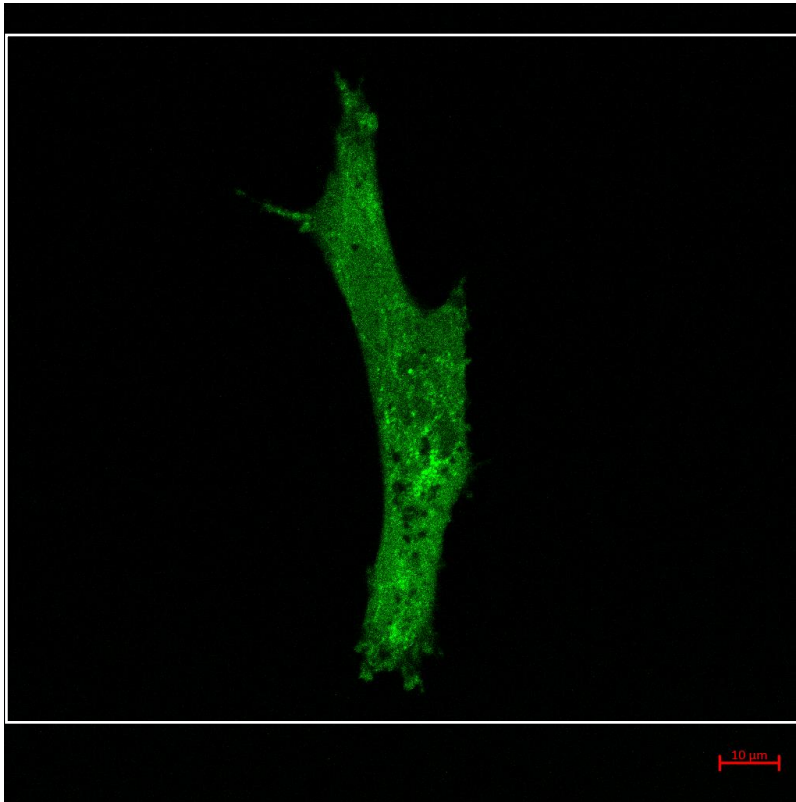

MitoTracker Red CMXRos

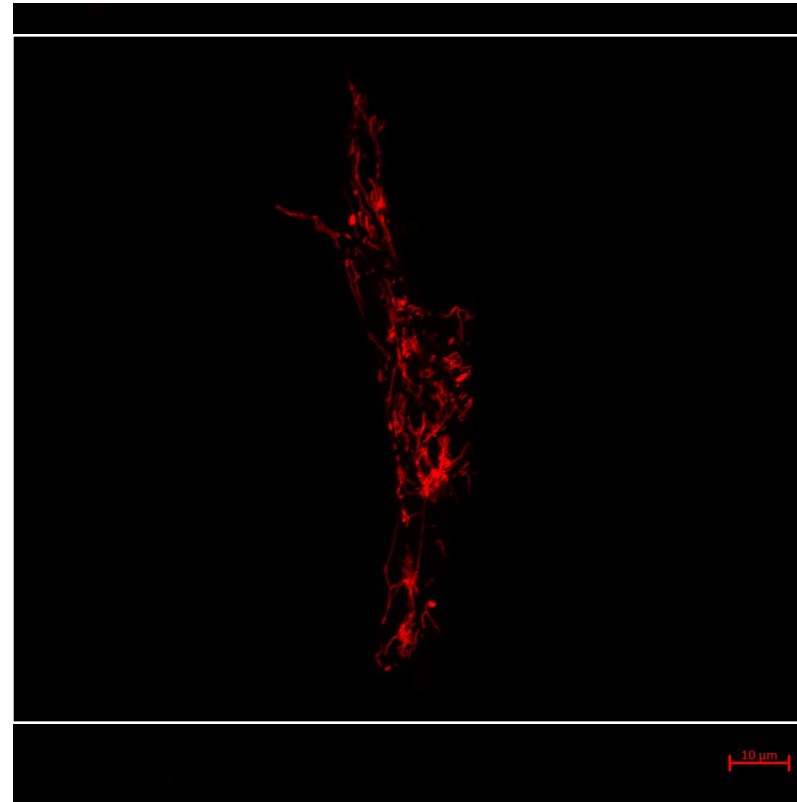

Overlay

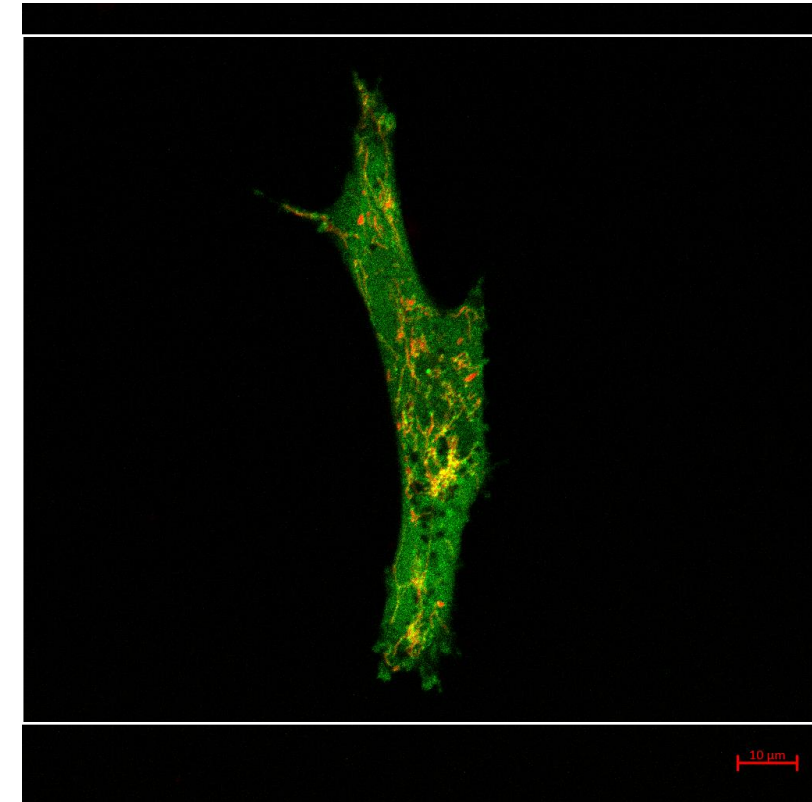

Fig 8A

Wild-type  
 $\Delta RT^{MTCH2}$

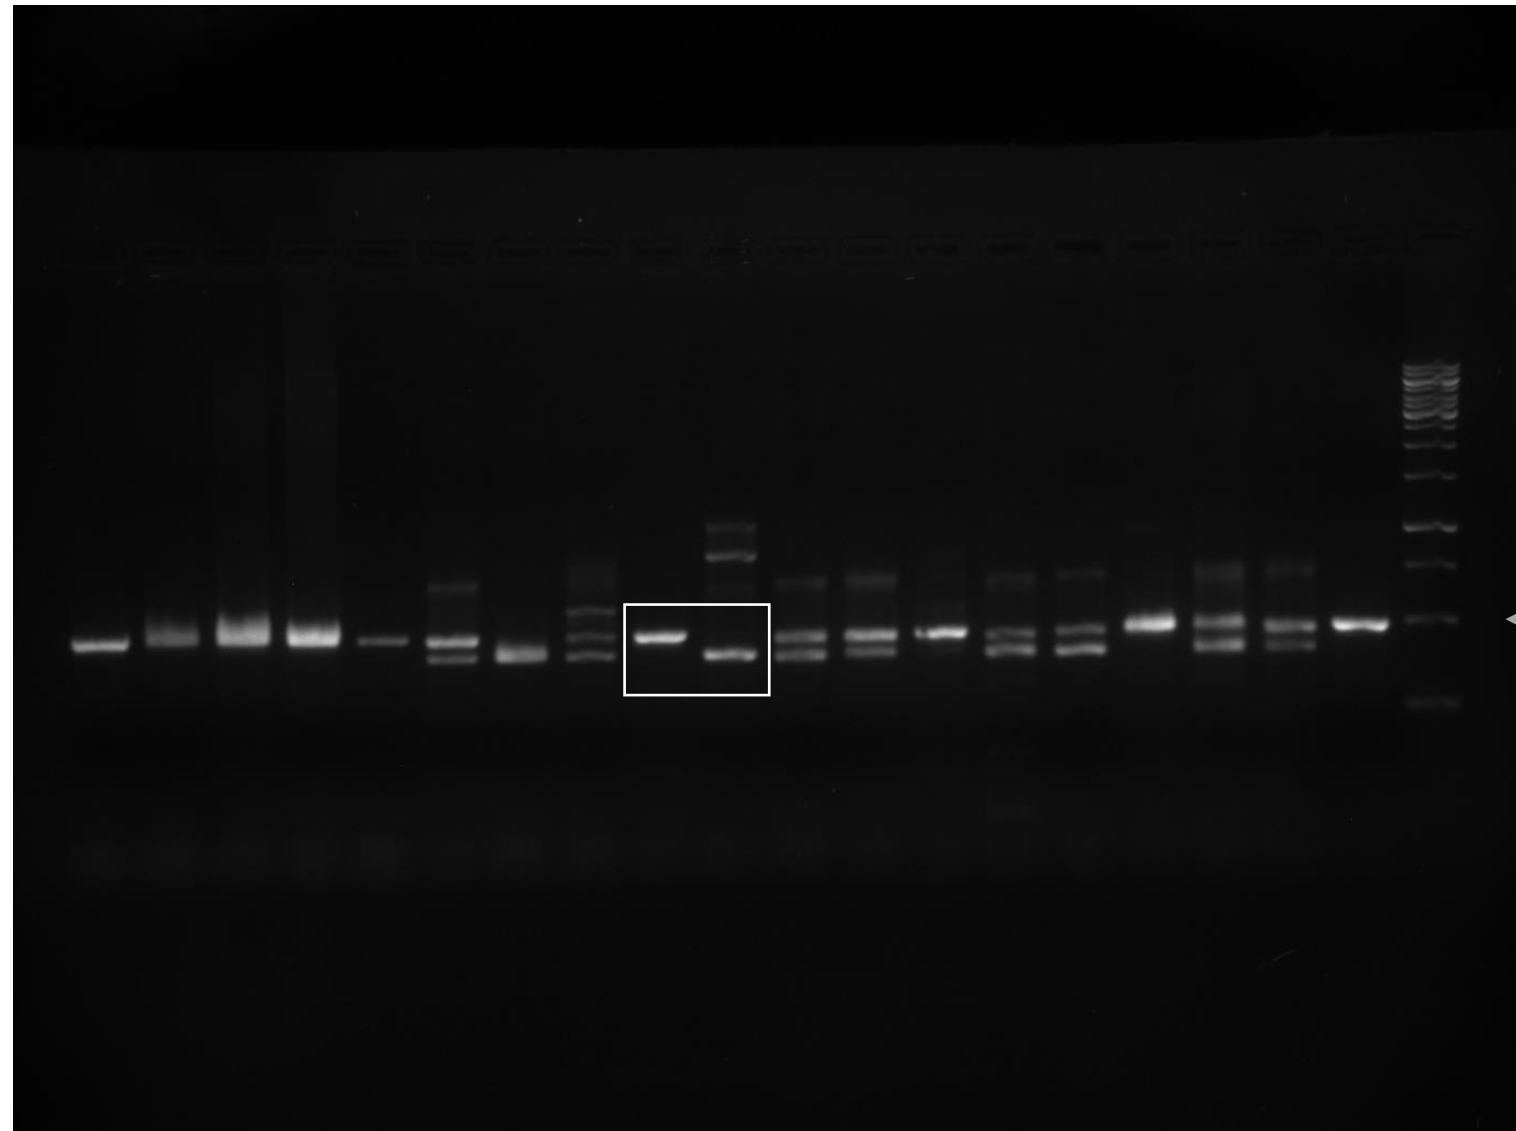

500 bp

PCR genomic DNA

**Fig 8B**

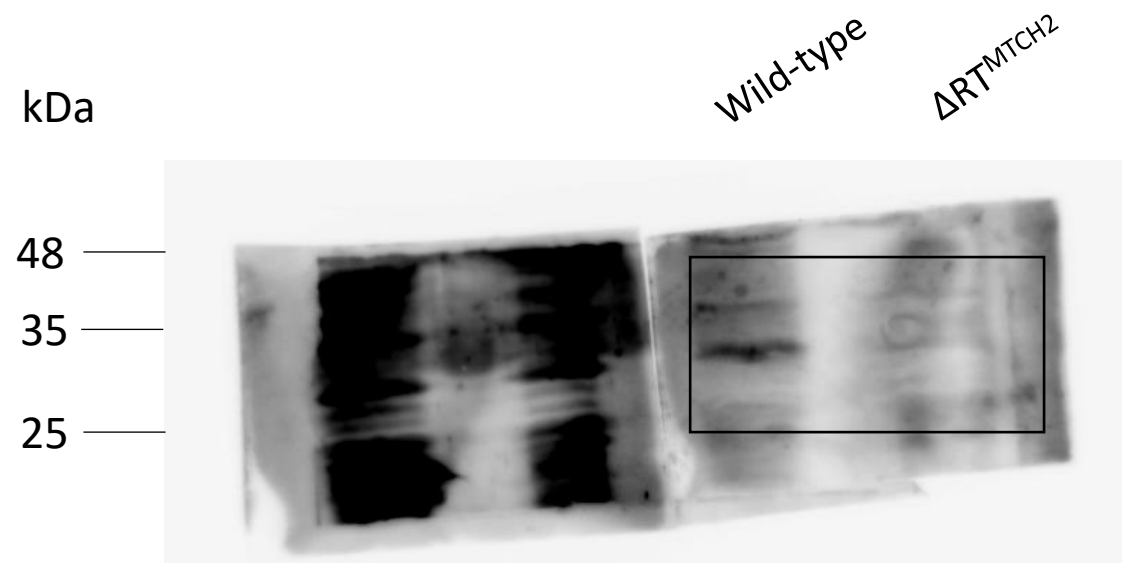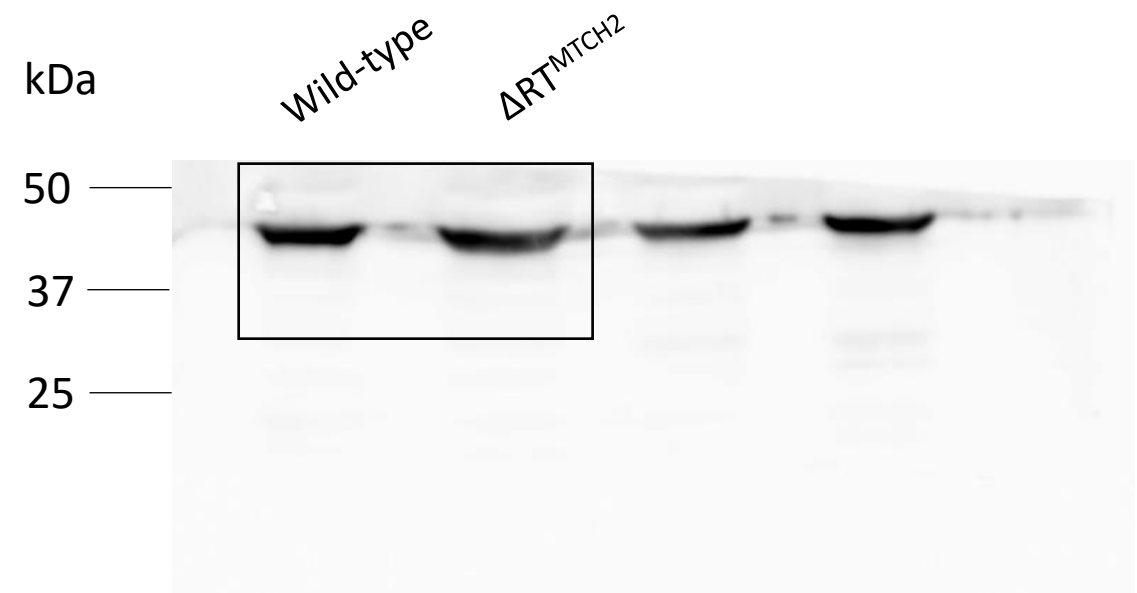

**Fig 8B**

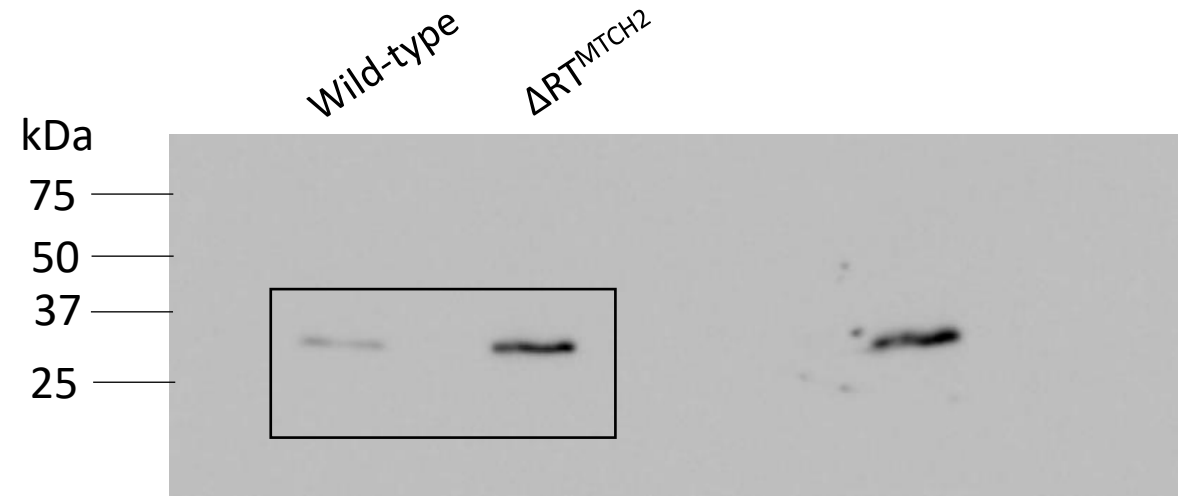

*IB, anti-MTCH2*  
short exposure

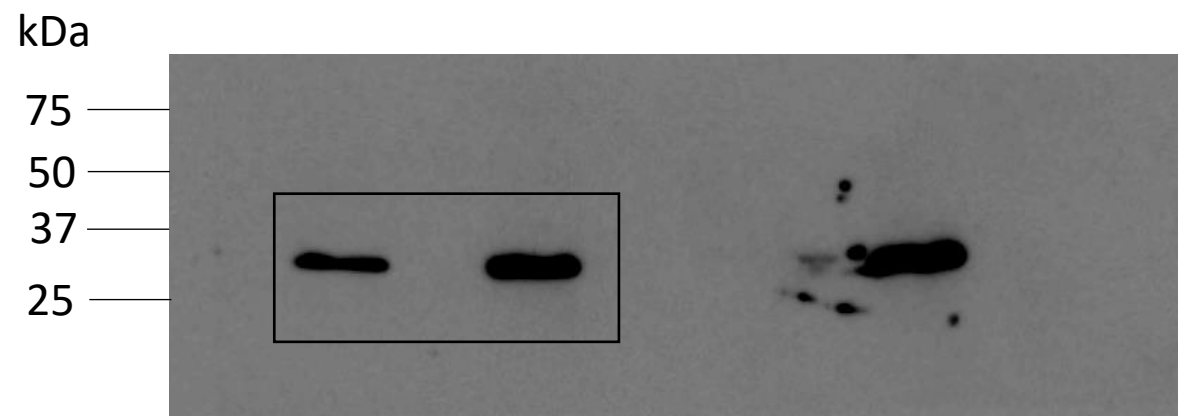

*IB, anti-MTCH2*  
long exposure

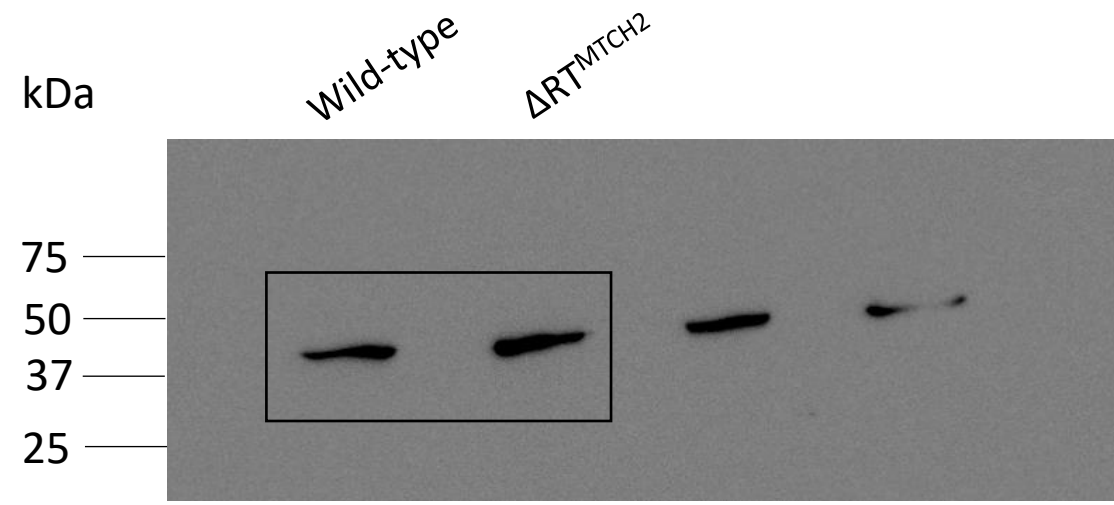

*IB, anti-Actin*

**Fig 8C**

| <b>Sample</b>                                       | <b>Replicate</b> | <b>Fluorescence ratio <math>\lambda_{594}/\lambda_{538}</math></b> | <b>Average</b> | <b>SD</b>   |
|-----------------------------------------------------|------------------|--------------------------------------------------------------------|----------------|-------------|
| <b>WT</b>                                           | 1                | 2.115625                                                           | 1.866452543    | 0.197505509 |
|                                                     | 2                | 1.749457701                                                        |                |             |
|                                                     | 3                | 1.672858617                                                        |                |             |
|                                                     | 4                | 1.927868852                                                        |                |             |
| <b><math>\Delta</math>RT<sup>MTCH2</sup> Clone1</b> | 1                | 0.875258442                                                        | 1.115097812    | 0.182050791 |
|                                                     | 2                | 1.127009646                                                        |                |             |
|                                                     | 3                | 1.140215716                                                        |                |             |
|                                                     | 4                | 1.317907445                                                        |                |             |
| <b><math>\Delta</math>RT<sup>MTCH2</sup> Clone2</b> | 1                | 1.164420485                                                        | 1.237301775    | 0.093652709 |
|                                                     | 2                | 1.150819672                                                        |                |             |
|                                                     | 3                | 1.337272727                                                        |                |             |
|                                                     | 4                | 1.296694215                                                        |                |             |
| <b>H2O2</b>                                         | 1                | 0.953448276                                                        |                |             |
|                                                     |                  |                                                                    |                |             |
| <b>P value</b>                                      |                  |                                                                    |                |             |
| WT and $\Delta$ RT <sup>MTCH2</sup> Clone1          |                  | 0.001                                                              |                |             |
| WT and $\Delta$ RT <sup>MTCH2</sup> Clone2          |                  | 0.001                                                              |                |             |



**Fig 8D**

| <b>Sample</b>                                | <b>Replicate</b> | <b>Luminescence</b> | <b>Average</b> | <b>SD</b>   |
|----------------------------------------------|------------------|---------------------|----------------|-------------|
| <b>WT</b>                                    | 1                | 1190000             | 1216666.667    | 83266.63998 |
|                                              | 2                | 1310000             |                |             |
|                                              | 3                | 1150000             |                |             |
| <b><math>\Delta</math>RT<sup>MTCH2</sup></b> | 1                | 874000              | 871333.3333    | 95028.06603 |
|                                              | 2                | 965000              |                |             |
|                                              | 3                | 775000              |                |             |
|                                              |                  |                     |                |             |
| P value                                      |                  |                     |                |             |
| WT and $\Delta$ RT <sup>MTCH2</sup>          |                  | 0.009               |                |             |

**Fig 8E**

| <b>Sample</b>                                | <b>Replicate</b> | <b>Mean fluorescence</b> | <b>Average</b> | <b>SD</b>   |
|----------------------------------------------|------------------|--------------------------|----------------|-------------|
| <b>WT</b>                                    | 1                | 5911.62                  | 5932.093333    | 461.6006452 |
|                                              | 2                | 5481.07                  |                |             |
|                                              | 3                | 6403.59                  |                |             |
| <b><math>\Delta</math>RT<sup>MTCH2</sup></b> | 1                | 6175.87                  | 6319.166667    | 126.5572267 |
|                                              | 2                | 6365.99                  |                |             |
|                                              | 3                | 6415.64                  |                |             |
|                                              |                  |                          |                |             |
| P value                                      |                  |                          |                |             |
| WT and $\Delta$ RT <sup>MTCH2</sup>          |                  | ns                       |                |             |

**Fig 8F**

| <b>Sample</b>              | <b>Replicate</b> | <b>Expression in <math>\Delta RT^{MTCH2}</math> relative to WT</b> | <b>Average</b> | <b>SD</b>   |
|----------------------------|------------------|--------------------------------------------------------------------|----------------|-------------|
| <b><i>MT-ND1</i></b>       | 1                | 0.271683716                                                        | 0.306139678    | 0.032727104 |
|                            | 2                | 0.336808394                                                        |                |             |
|                            | 3                | 0.309926925                                                        |                |             |
| <b><i>MT-CYB</i></b>       | 1                | 0.287174589                                                        | 0.285195496    | 0.001976813 |
|                            | 2                | 0.285190929                                                        |                |             |
|                            | 3                | 0.283220971                                                        |                |             |
| <b><i>MT-CO1</i></b>       | 1                | 0.305660069                                                        | 0.346787207    | 0.063936831 |
|                            | 2                | 0.420448208                                                        |                |             |
|                            | 3                | 0.314253344                                                        |                |             |
| <b><i>MT-ATP6</i></b>      | 1                | 0.236514412                                                        | 0.321583023    | 0.087753691 |
|                            | 2                | 0.316439148                                                        |                |             |
|                            | 3                | 0.411795509                                                        |                |             |
| P value                    |                  |                                                                    |                |             |
| WT and $\Delta RT^{MTCH2}$ |                  | <0.01                                                              |                |             |



**Fig 8G**

**WT**

**$\Delta RT^{MTCH2}$**

Day 0

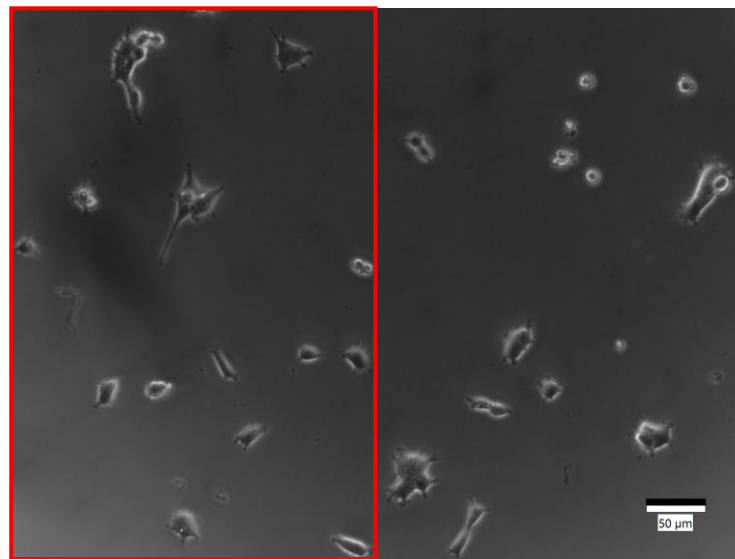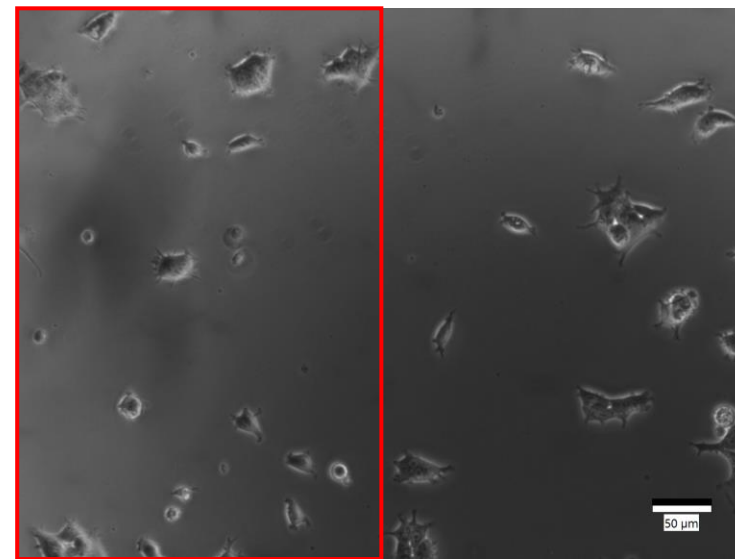

Day 3

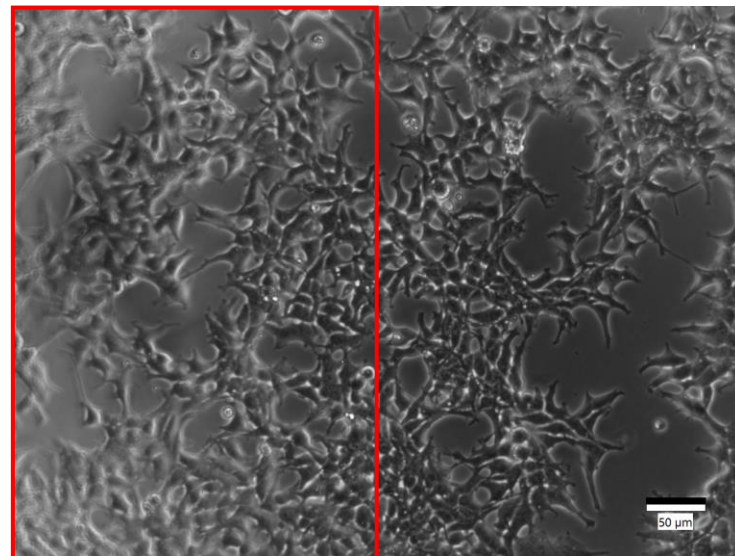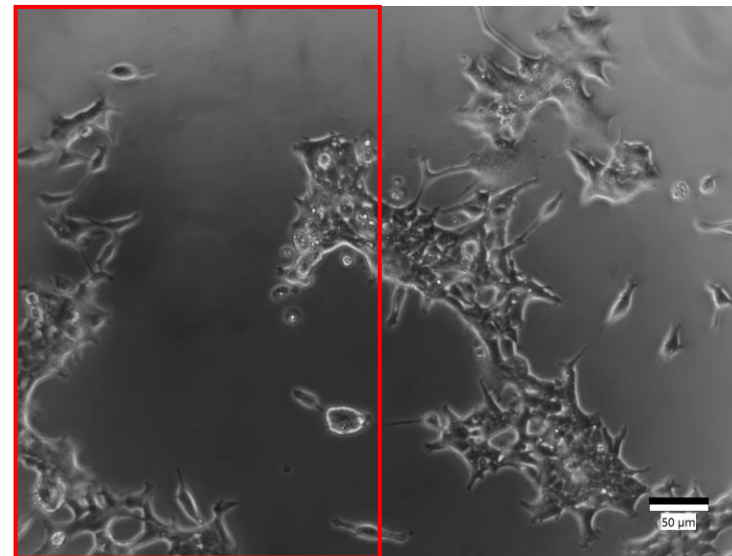

**Fig S3**

| Sample                                                                            | Replicate | Fluc   | Rluc  | Fluc/Rluc   | Avg         | SD          |
|-----------------------------------------------------------------------------------|-----------|--------|-------|-------------|-------------|-------------|
| <b><i>MTCH2 -Stop-Fluc</i></b>                                                    | 1         | 98     | 940   | 0.104255319 | 0.089402752 | 0.025513265 |
|                                                                                   | 2         | 332    | 3192  | 0.104010025 |             |             |
|                                                                                   | 3         | 63     | 1051  | 0.059942912 |             |             |
| <b><i>MTCH2 -Stop-ISR1-FLuc</i></b>                                               | 1         | 1061   | 4498  | 0.235882614 | 0.237692587 | 0.03628877  |
|                                                                                   | 2         | 1211   | 4406  | 0.274852474 |             |             |
|                                                                                   | 3         | 881    | 4354  | 0.202342673 |             |             |
| <b><i>MTCH2 -Stop-ISR1+12<sup>ISR2</sup>-FLuc</i></b>                             | 1         | 28155  | 10658 | 2.641677613 | 2.253733598 | 0.346227203 |
|                                                                                   | 2         | 27455  | 12809 | 2.143414786 |             |             |
|                                                                                   | 3         | 24648  | 12473 | 1.976108394 |             |             |
| <b><i>MTCH2 -No Stop-Fluc</i></b>                                                 | 1         | 51825  | 12858 | 4.030564629 | 4.207588089 | 0.163085407 |
|                                                                                   | 2         | 47981  | 11315 | 4.240477243 |             |             |
|                                                                                   | 3         | 51668  | 11873 | 4.351722395 |             |             |
|                                                                                   |           |        |       |             |             |             |
| P value                                                                           |           |        |       |             |             |             |
| <b><i>MTCH2- Stop-Fluc</i> and <i>MTCH2- Stop-ISR1-FLuc</i></b>                   |           | 0.005  |       |             |             |             |
| <b><i>MTCH2- Stop-Fluc</i> and <i>MTCH2- Stop-ISR1+12<sup>ISR2</sup>-FLuc</i></b> |           | 0.0004 |       |             |             |             |

**Fig S3**

MTCH2-Stop-FLuc  
MTCH2-Stop-ISR1-FLuc  
MTCH2-Stop-ISR1+12<sup>ISR2</sup>-FLuc  
MTCH2-No Stop-FLuc

*FLuc*

1 kb

*GAPDH*

1 kb

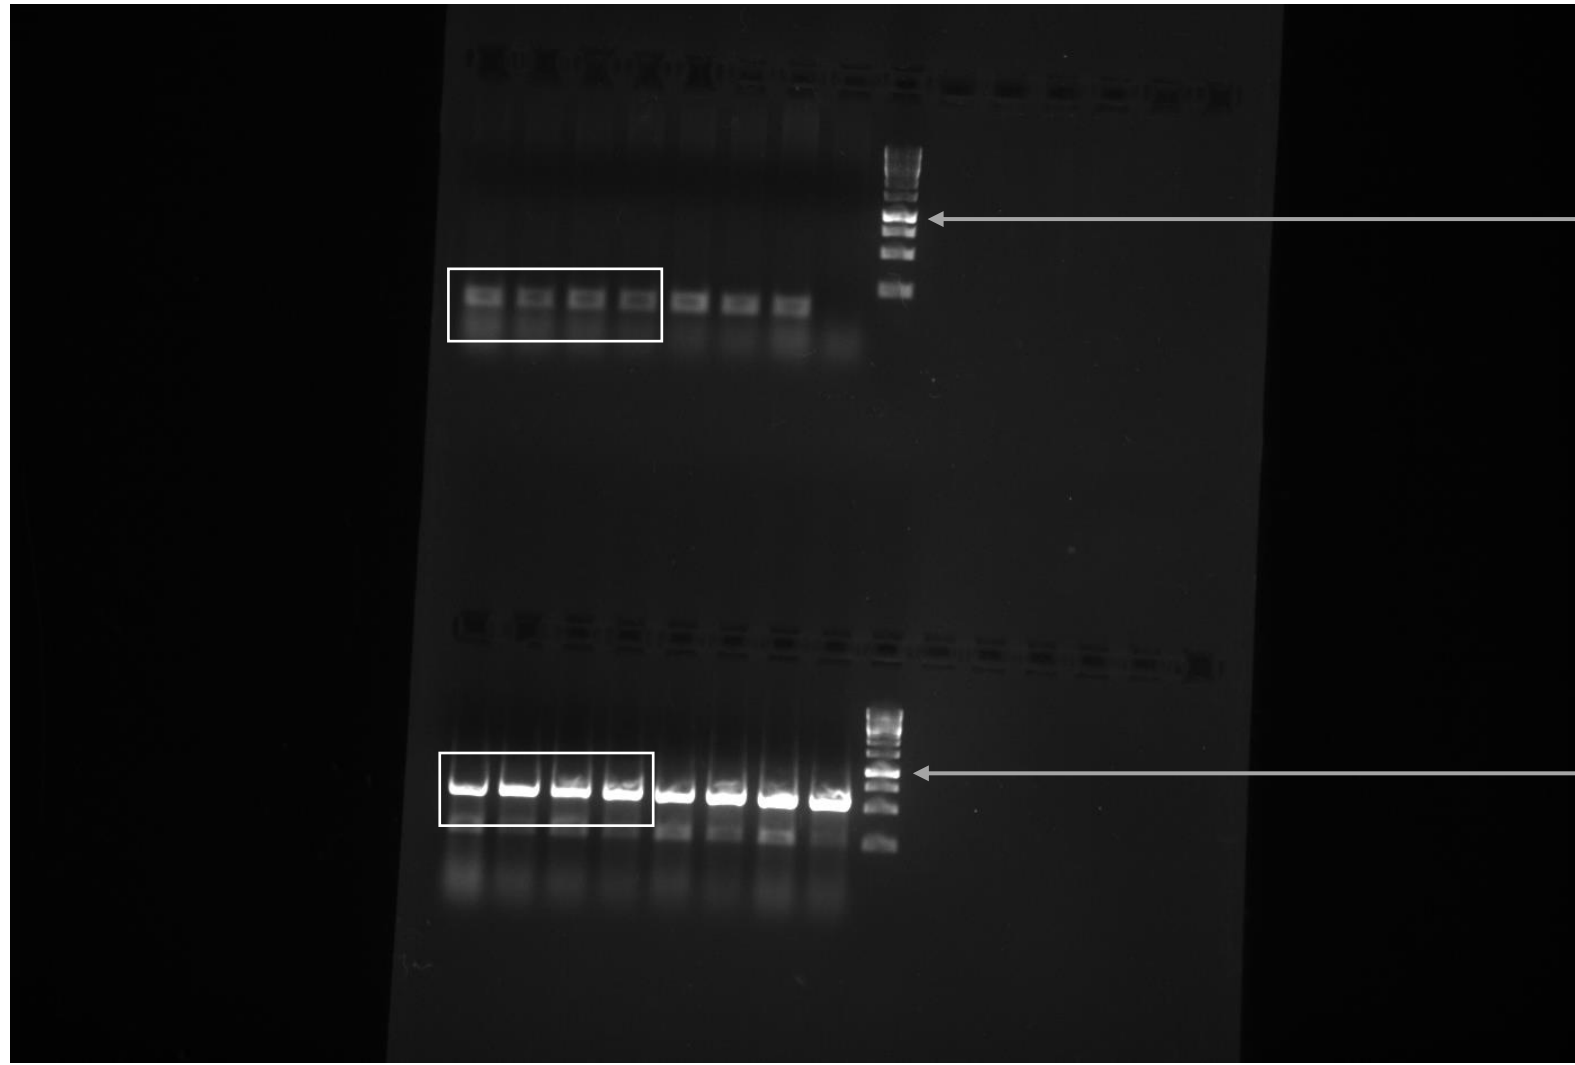

**Fig S4**

| <b>Sample</b>                                         | <b>Replicate</b> | <b>Fluc</b> | <b>Avg</b>  | <b>SD</b>   |
|-------------------------------------------------------|------------------|-------------|-------------|-------------|
| <b>MTCH2-Stop-Fluc</b>                                | 1                | 35          | 36          | 6.557438524 |
|                                                       | 2                | 43          |             |             |
|                                                       | 3                | 30          |             |             |
| <b>MTCH2-Stop-ISR1+12<sup>ISR2</sup> (WT)-FLuc</b>    | 1                | 2110        | 1990        | 355.5277767 |
|                                                       | 2                | 2270        |             |             |
|                                                       | 3                | 1590        |             |             |
| <b>MTCH2-Stop-ISR1+12<sup>ISR2</sup> (GG-CU)-FLuc</b> | 1                | 2090        | 1873.333333 | 188.2374387 |
|                                                       | 2                | 1750        |             |             |
|                                                       | 3                | 1780        |             |             |
| <b>MTCH2-Stop-ISR1+12<sup>ISR2</sup> (AG-GA)-FLuc</b> | 1                | 2860        | 2923.333333 | 290.229794  |
|                                                       | 2                | 3240        |             |             |
|                                                       | 3                | 2670        |             |             |



**Fig S5A**

| Sample                                                                        | Replicate | Fluc   | Avg         | SD          |
|-------------------------------------------------------------------------------|-----------|--------|-------------|-------------|
| MTCH2-Stop-Fluc                                                               | 1         | 18     | 17.33333333 | 1.154700538 |
|                                                                               | 2         | 18     |             |             |
|                                                                               | 3         | 16     |             |             |
| MTCH2-Stop-ISR1+12 <sup>ISR2</sup> -FLuc                                      | 1         | 924    | 1132        | 497.7388874 |
|                                                                               | 2         | 1700   |             |             |
|                                                                               | 3         | 772    |             |             |
| MTCH2-Stop-12 <sup>ISR2</sup> -FLuc                                           | 1         | 1050   | 1002.333333 | 118.8963134 |
|                                                                               | 2         | 1090   |             |             |
|                                                                               | 3         | 867    |             |             |
| MTCH2-non specific-FLuc                                                       | 1         | 40     | 39.33333333 | 1.154700538 |
|                                                                               | 2         | 40     |             |             |
|                                                                               | 3         | 38     |             |             |
| P value                                                                       |           |        |             |             |
| <i>MTCH2 -Stop-Fluc</i> and <i>MTCH2 -Stop-ISR1+12<sup>ISR2</sup>-FLuc</i>    |           | 0.018  |             |             |
| <i>MTCH2 -Stop-Fluc</i> and <i>MTCH2 -Stop+12<sup>ISR2</sup>-FLuc</i>         |           | <0.001 |             |             |
| <i>MTCH2 -Stop+12<sup>ISR2</sup>-Fluc</i> and <i>MTCH2 -Non specific-Fluc</i> |           | <0.001 |             |             |

**Fig S5B**

| <b>Sample</b>                                      | <b>Replicate</b> | <b>Fluc</b>                | <b>Avg</b>  | <b>SD</b>   |
|----------------------------------------------------|------------------|----------------------------|-------------|-------------|
| <b>MTCH2-Stop-ISR1-Stop-Fluc</b>                   | 1                | 135                        | 164.6666667 | 29.0229794  |
|                                                    | 2                | 166                        |             |             |
|                                                    | 3                | 193                        |             |             |
| <b>MTCH2-Stop-ISR1-Stop-12<sup>ISR2</sup>-FLuc</b> | 1                | 18000                      | 23333.33333 | 5401.234427 |
|                                                    | 2                | 28800                      |             |             |
|                                                    | 3                | 23200                      |             |             |
|                                                    |                  |                            |             |             |
| P value                                            | 0.018            | Welch's correction applied |             |             |

**Fig S6A**

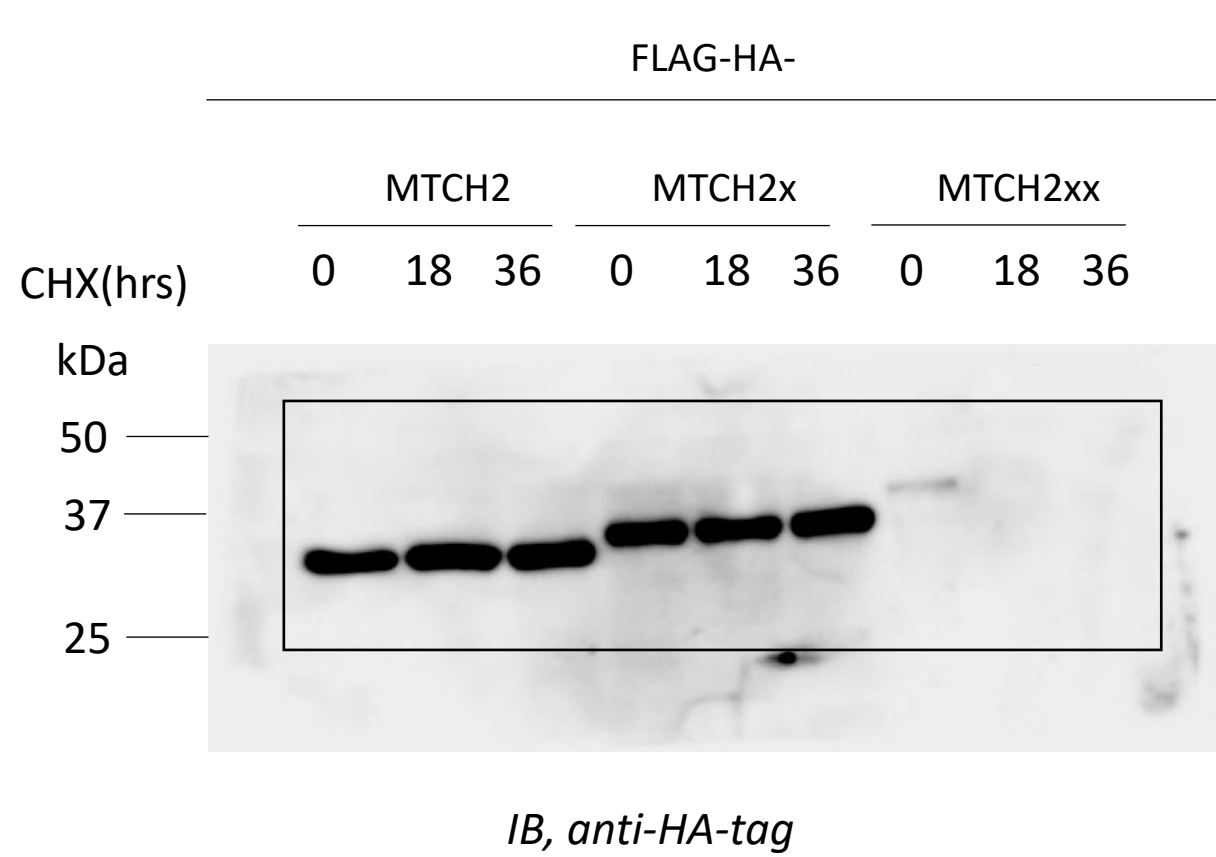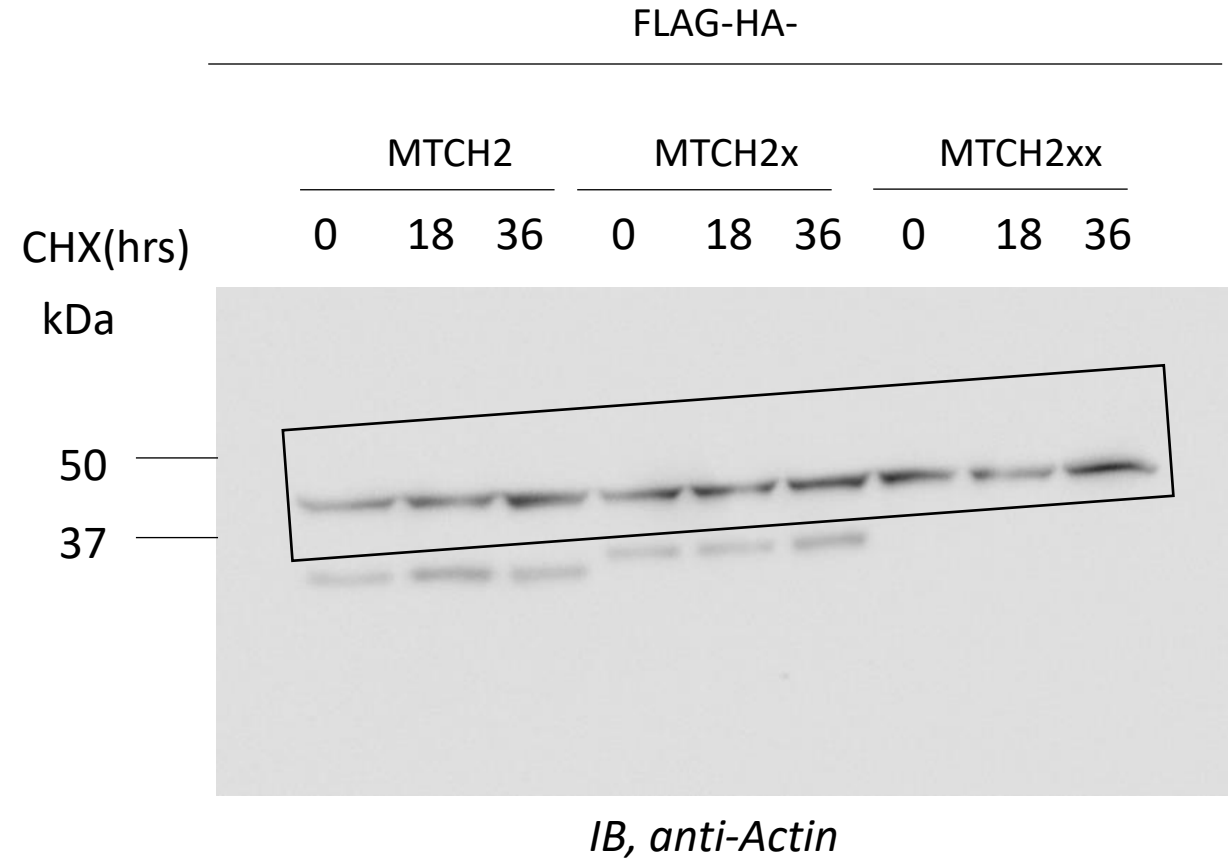

**Fig S6B**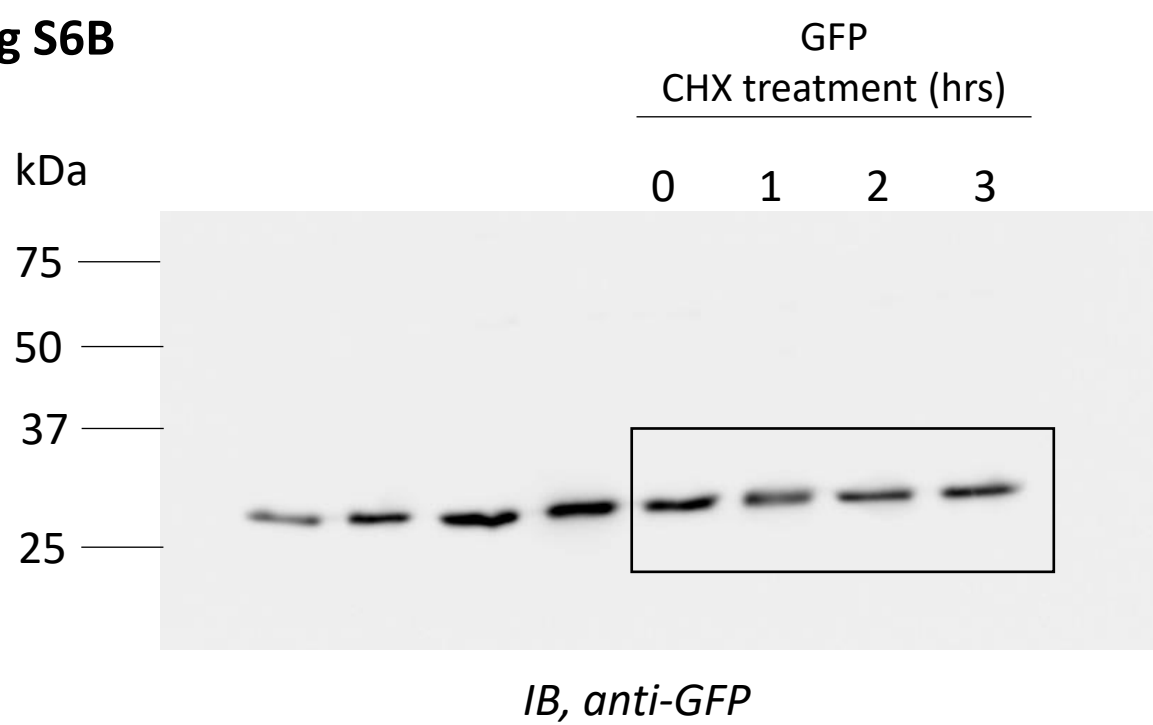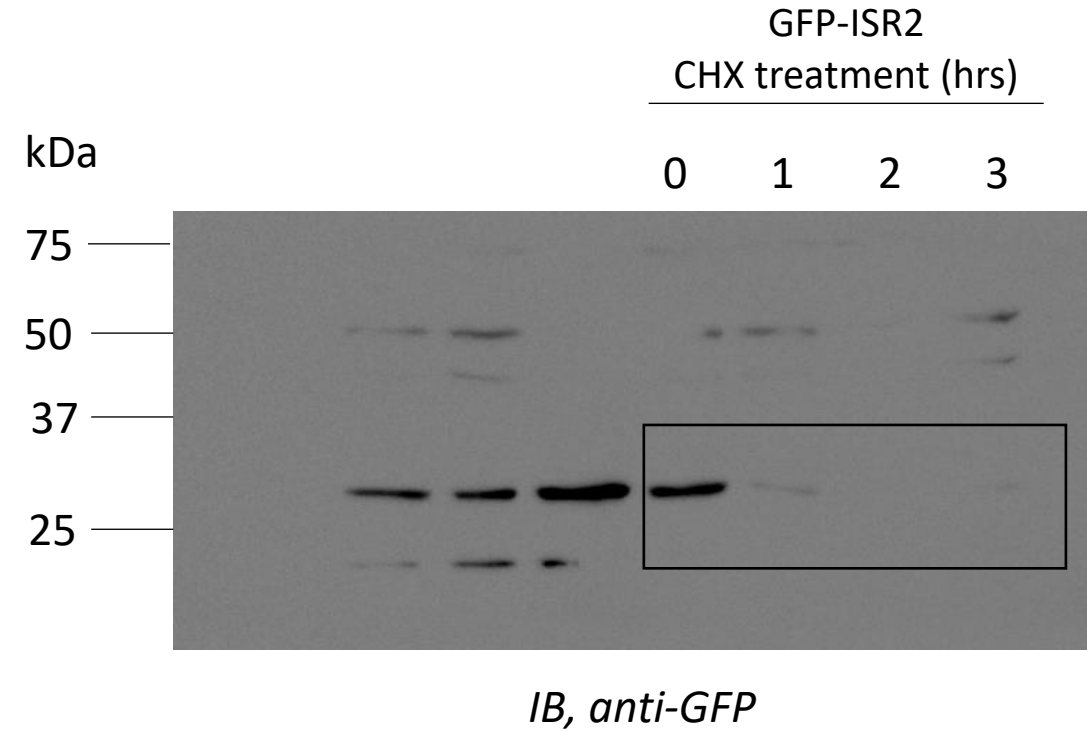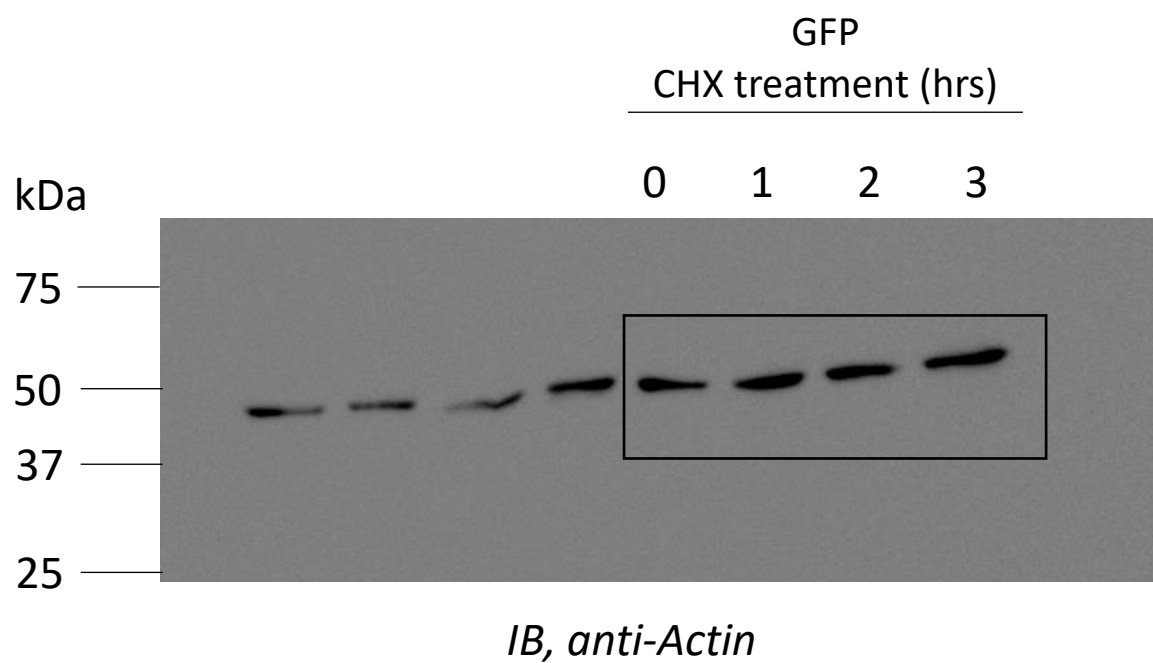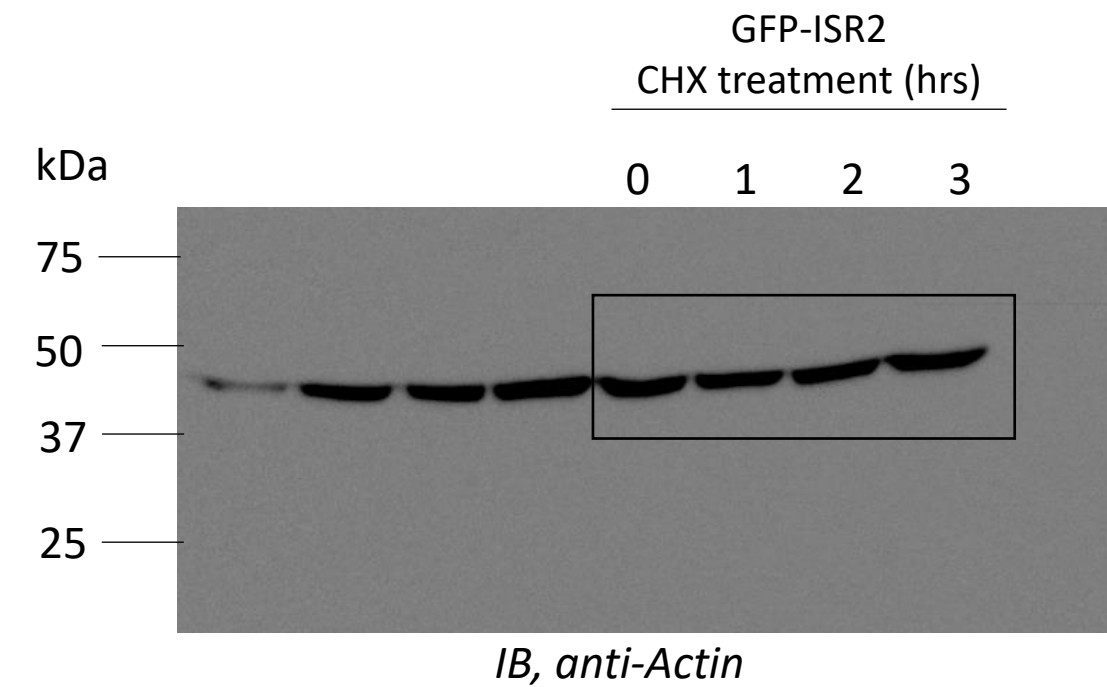

**Fig S6C**

DsRed

Brightfield

mtDsRed  
Stop  
ISR1+ISR2

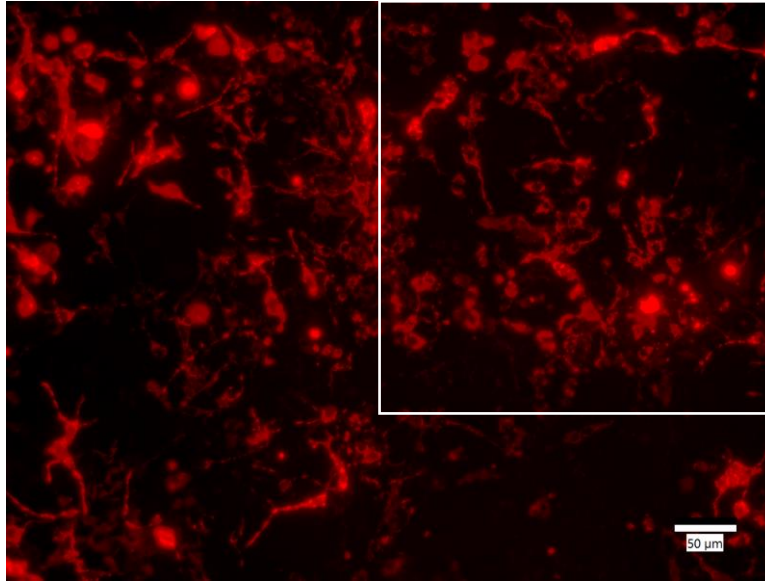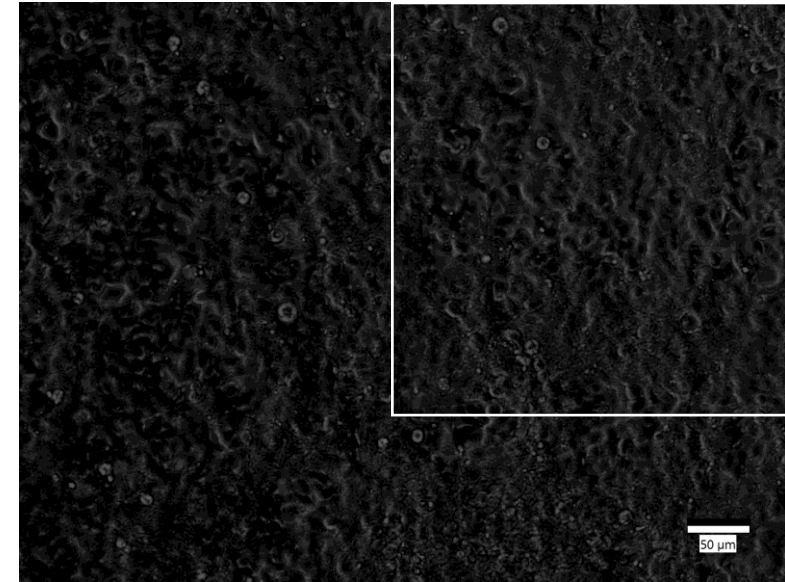

mtDsRed  
ISR1+ISR2

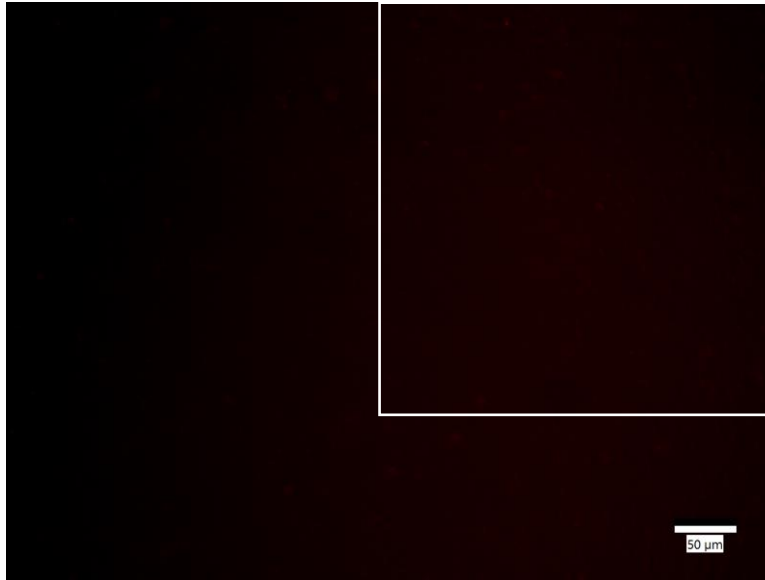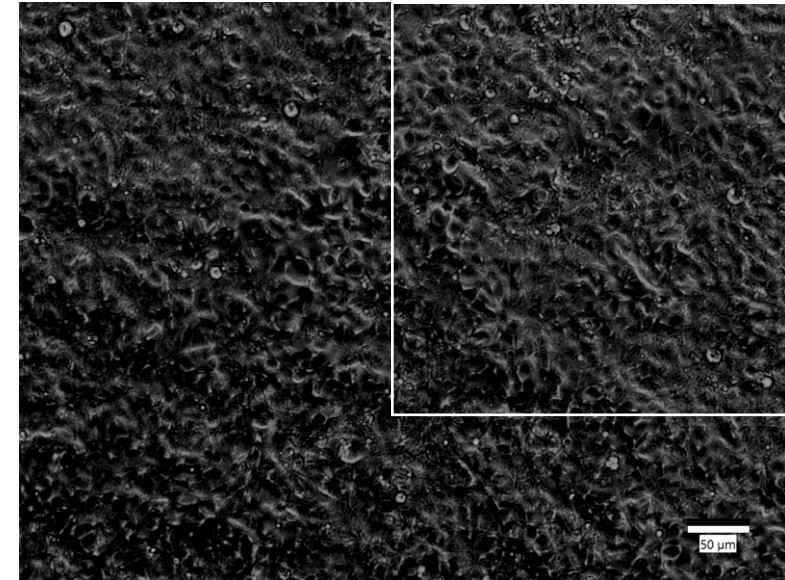

Fig S6C

mtDsRed

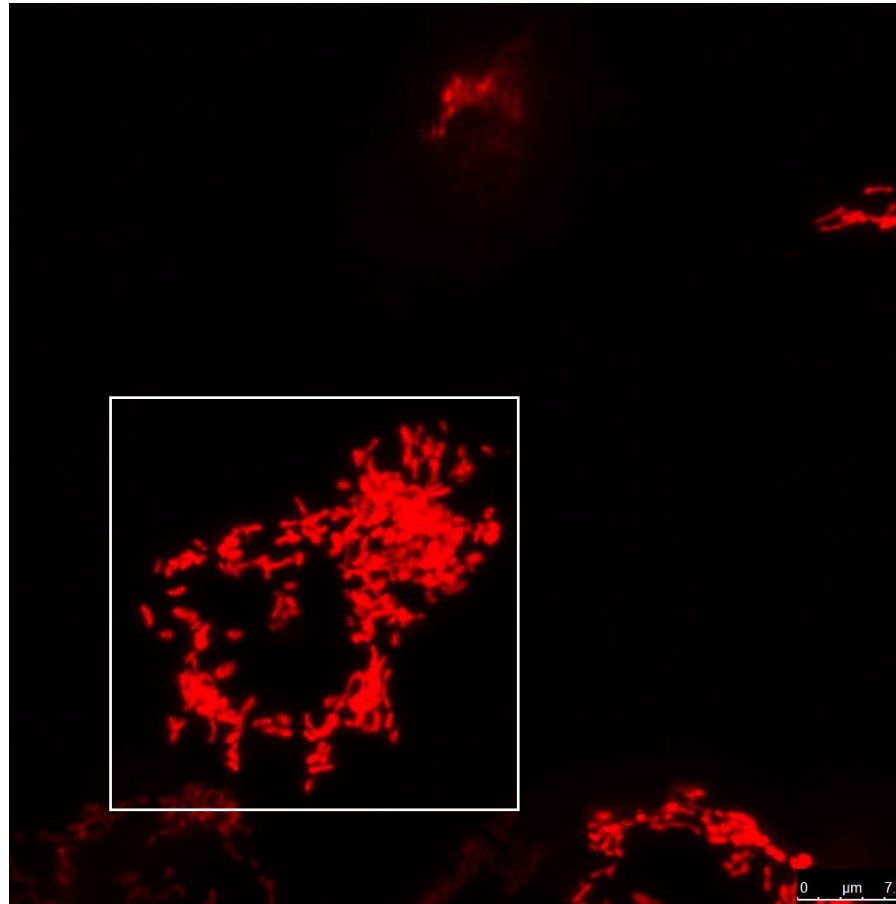

HEK293

Fig S7A

GFP-MTCH2xx

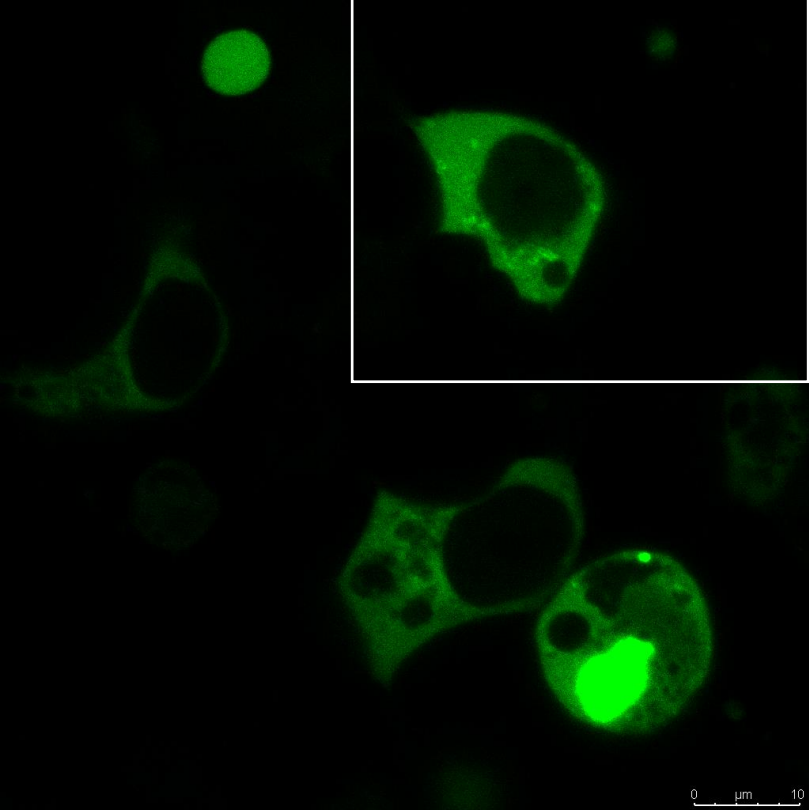

MitoTracker Red CMXRos

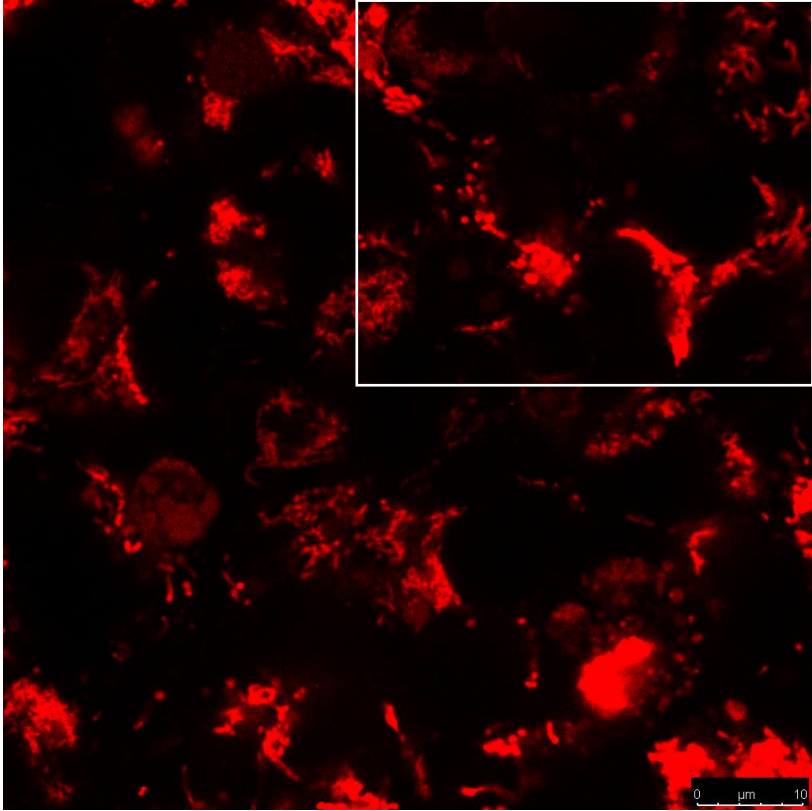

Overlay

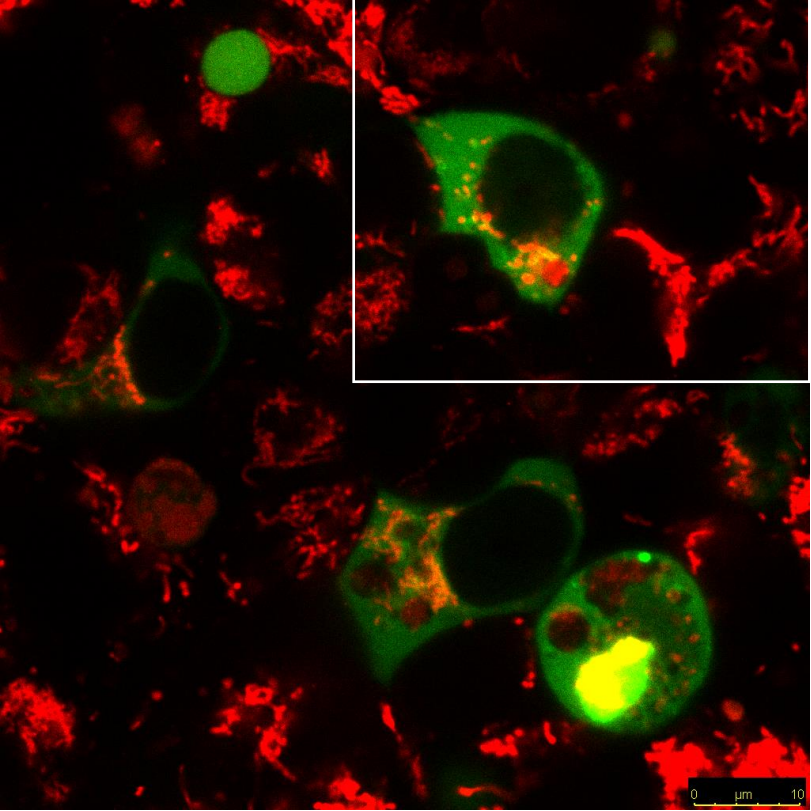



Fig S7A

GFP-MTCH2x

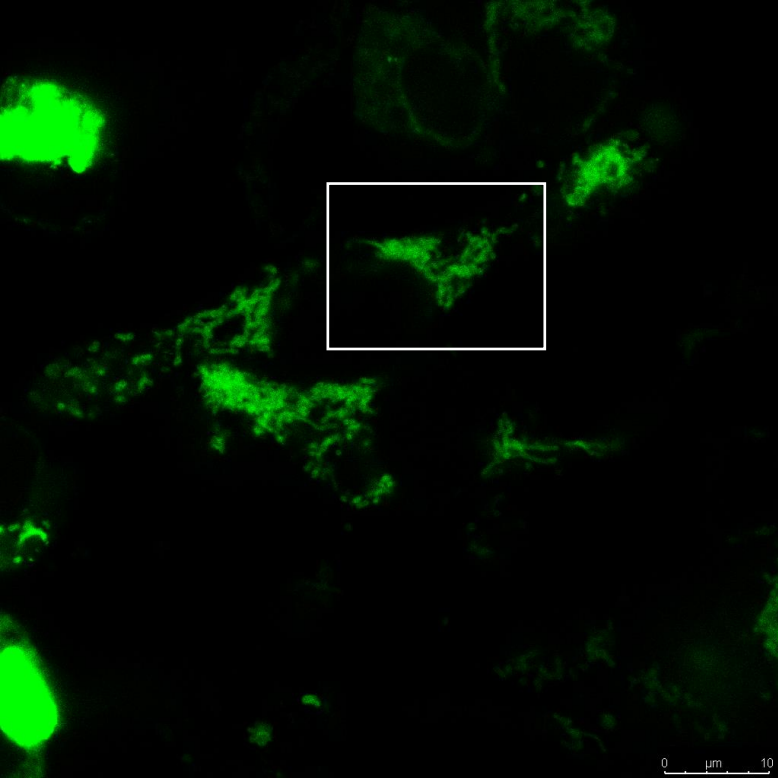

MitoTracker Red CMXRos

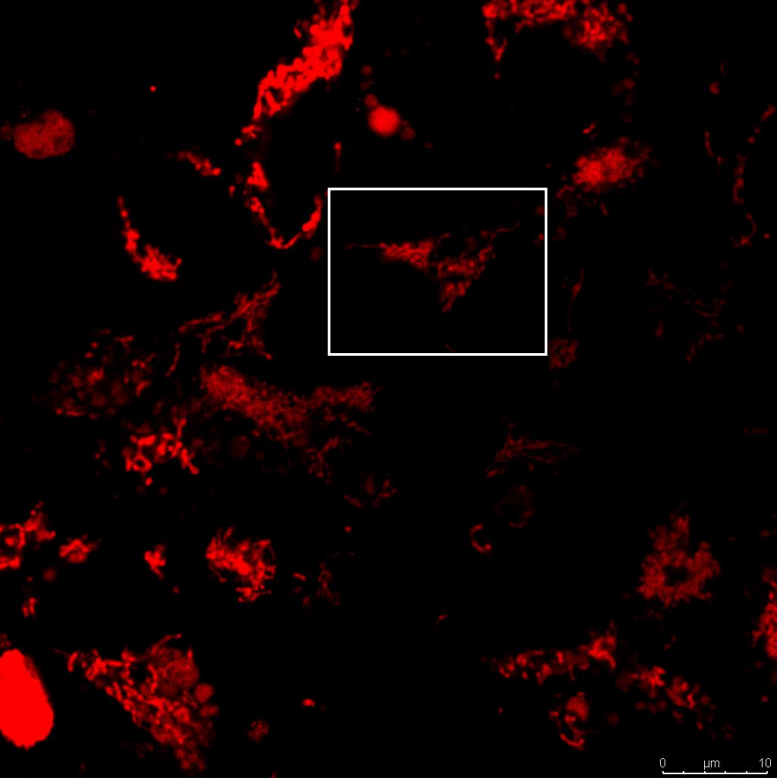

Overlay

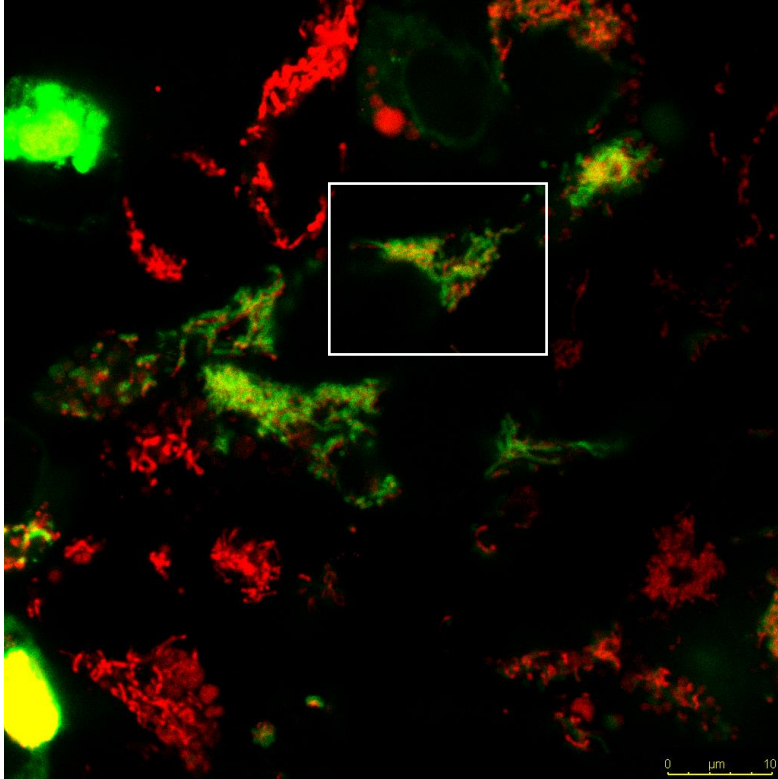



Fig S7A

GFP-MTCH2

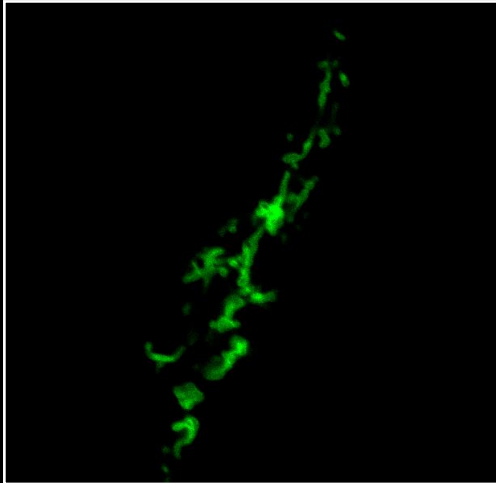

0 μm 10

MitoTracker Red CMXRos

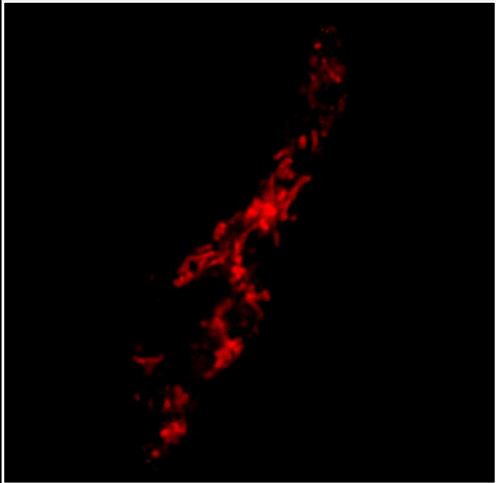

0 μm 10

Overlay

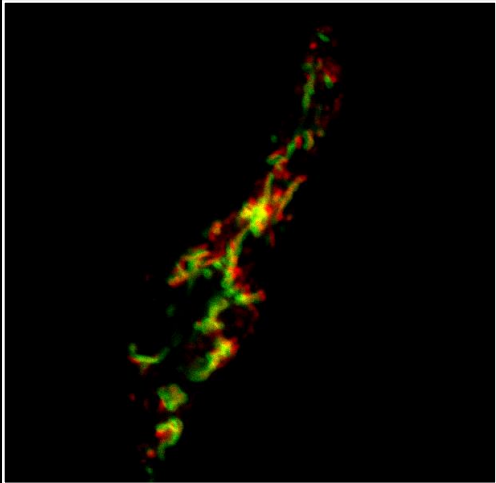

0 μm 10

Fig S7B

GFP-MTCH2xx

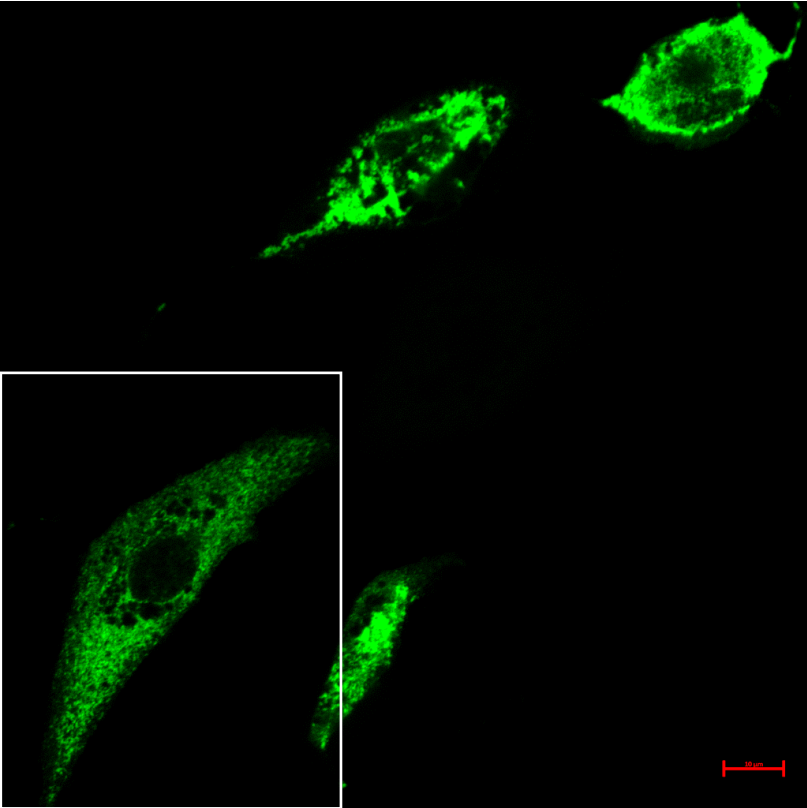

RPL10a

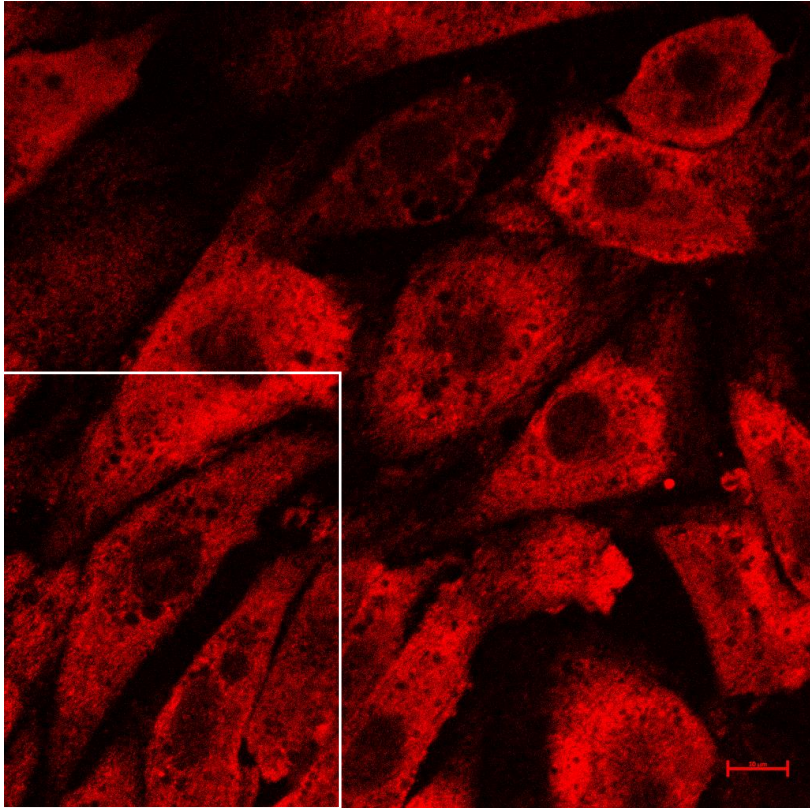

Overlay

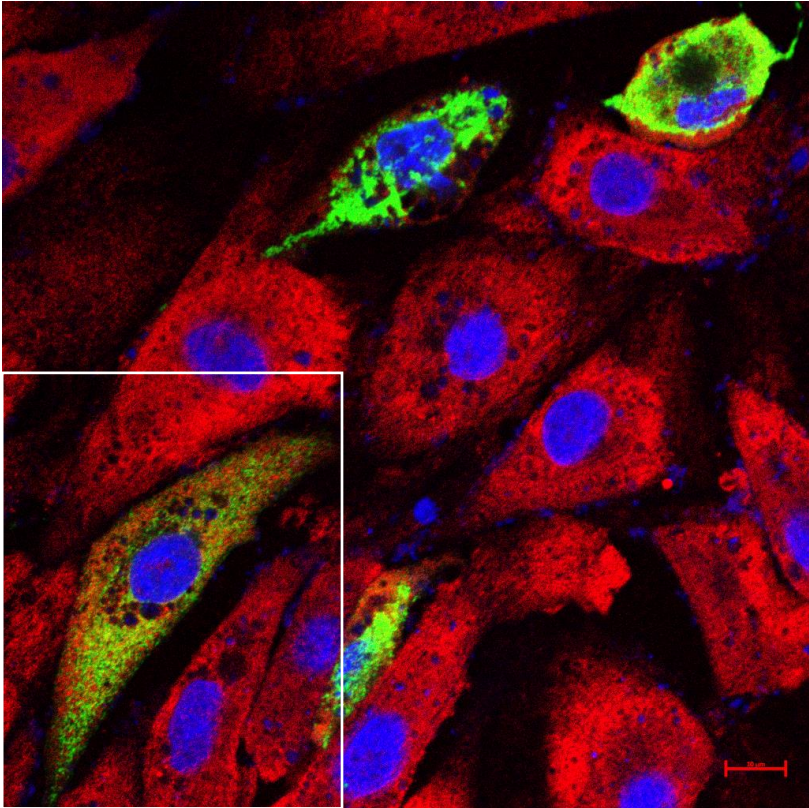

Supplement: supp_RA120.014253_160699_2_supp_606529_qhl9hf.pdf [file supp_RA120.014253_160699_2_supp_606529_qhl9hf.pdf]
